# Supplementary material for: Distinct roles of nonmuscle myosin II isoforms for establishing tension and elasticity during cell morphodynamics
Source: eLife journal article supplement (doi:10.7554/elife.71888), 2021-08-10
Supplement: data1 [file Figure 1 and Figure 1_figure supplement 2_source data.xlsx]

## Sheet: Tabelle2
Column1	Column2	Column3	Column4	Column5	Column6	Column7	Column8	Column9	Column10	Column11
	filename	focaladhesioncount	pixelarea	nucleuscount	totalarea	cellArea	type	date	scaling	FA density
0	Experiment 3_080320/NM IIA-KO/Snap-4415.czi	52	0.530516659459014	1	27.5868662918687	2290.05853566804	NM IIA-KO	80320	0.00498047775625	0.02270684316147
6	Experiment 3_080320/NM IIA-KO/Snap-4411.czi	85	0.713966134822426	1	60.6871214599062	2286.46263072803	NM IIA-KO	80320	0.00498047775625	0.037175328762288
11	Experiment 3_080320/NM IIA-KO/Snap-4403.czi	73	0.551946096548801	1	40.2920650480625	2190.08042518908	NM IIA-KO	80320	0.00498047775625	0.033332109250599
12	Experiment 3_080320/NM IIA-KO/Snap-4412.czi	75	0.375992867411833	1	28.1994650558875	2894.255233712	NM IIA-KO	80320	0.00498047775625	0.025913402220512
15	Experiment 3_080320/NM IIA-KO/Snap-4400.czi	96	0.431018845822135	1	41.377809198925	2697.13788507514	NM IIA-KO	80320	0.00498047775625	0.035593285953686
16	Experiment 3_080320/NM IIA-KO/Snap-4402.czi	30	0.416533956347708	1	12.4960186904313	2220.32188612503	NM IIA-KO	80320	0.00498047775625	0.013511554422569
17	Experiment 3_080320/NM IIA-KO/Snap-4404.czi	80	0.596349955338984	1	47.7079964271188	2016.83450643792	NM IIA-KO	80320	0.00498047775625	0.039666120221879
18	Experiment 3_080320/NM IIA-KO/Snap-4398.czi	25	0.340266240307	1	8.506656007675	1450.96258472831	NM IIA-KO	80320	0.00498047775625	0.017229941187409
19	Experiment 3_080320/NM IIA-KO/Snap-4405.czi	40	0.459075537182344	1	18.3630214872937	2021.71039416129	NM IIA-KO	80320	0.00498047775625	0.019785227456672
25	Experiment 2_040320/NM IIA-KO/Snap-4425.czi	3	0.27890675435	1	0.83672026305	2130.78783750092	NM IIA-KO	40320	0.00498047775625	0.001407929943658
26	Experiment 2_040320/NM IIA-KO/Snap-4428.czi	0		1	0	1906.93030379076	NM IIA-KO	40320	0.00498047775625	0
27	Experiment 2_040320/NM IIA-KO/Snap-4429.czi	1	0.27890675435	1	0.27890675435	2303.3713527105	NM IIA-KO	40320	0.00498047775625	0.000434146234746
31	Experiment 2_040320/NM IIA-KO/Snap-4437.czi	0		1	0	2020.7989667319	NM IIA-KO	40320	0.00498047775625	0
32	Experiment 2_040320/NM IIA-KO/Snap-4441.czi	29	0.356533511102586	1	10.339471821975	2160.19257817383	NM IIA-KO	40320	0.00498047775625	0.013424729023241
34	Experiment 2_040320/NM IIA-KO/Snap-4430.czi	5	0.354610016245	1	1.773050081225	2231.60764872069	NM IIA-KO	40320	0.00498047775625	0.002240537221167
37	Experiment 2_040320/NM IIA-KO/Snap-4438.czi	0		1	0	2009.54806748053	NM IIA-KO	40320	0.00498047775625	0
40	Experiment 1_270220/NM IIA-KO/Experiment-1653-Orthogonal Projection-25.czi	9	0.330925077581944	1	2.9783256982375	1683.90949034364	NM IIA-KO	270220	0.00498047775625	0.005344705313207
41	Experiment 1_270220/NM IIA-KO/Experiment-1654-Orthogonal Projection-26.czi	12	0.341162726303125	1	4.0939527156375	2638.33836468485	NM IIA-KO	270220	0.00498047775625	0.004548317289634
44	Experiment 1_270220/NM IIA-KO/Snap-4391.czi	2	0.455713714696875	1	0.91142742939375	1261.59485948018	NM IIA-KO	270220	0.00498047775625	0.00158529498196
46	Experiment 1_270220/NM IIA-KO/Snap-4387.czi	12	0.447412918436458	1	5.3689550212375	1399.17059654107	NM IIA-KO	270220	0.00498047775625	0.008576509561926
47	Experiment 1_270220/NM IIA-KO/Snap-4381.czi	5	0.28189504100375	1	1.40947520501875	2163.09121622796	NM IIA-KO	270220	0.00498047775625	0.00231150677442
50	Experiment 1_270220/NM IIA-KO/Snap-4386.czi	11	0.376252455949432	1	4.13877701544375	1384.68736722589	NM IIA-KO	270220	0.00498047775625	0.007944031454579
51	Experiment 1_270220/NM IIA-KO/Snap-4394.czi	2	0.2490238878125	1	0.498047775625	1923.33599751984	NM IIA-KO	270220	0.00498047775625	0.001039859911414
54	Experiment 1_270220/NM IIA-KO/Experiment-1651-Orthogonal Projection-23.czi	6	0.300488824627083	1	1.8029329477625	3327.41734512857	NM IIA-KO	270220	0.00498047775625	0.001803200313536
55	Experiment 1_270220/NM IIA-KO/Snap-4392.czi	37	0.475299106954561	1	17.5860669573187	3114.17320951697	NM IIA-KO	270220	0.00498047775625	0.011881163156541
56	Experiment 1_270220/NM IIA-KO/Experiment-1656-Orthogonal Projection-28.czi	6	0.346973283685417	1	2.0818397021125	2506.75414236472	NM IIA-KO	270220	0.00498047775625	0.002393533493612
58	Experiment 1_270220/NM IIA-KO/Snap-4389.czi	21	0.479548858244643	1	10.0705260231375	1898.73243740397	NM IIA-KO	270220	0.00498047775625	0.011060010134294
62	Experiment 3_080320/NM IIB-KO/Snap-4393.czi	142	0.622384350596171	1	88.3785777846562	2083.32886496162	NM IIB-KO	80320	0.00498047775625	0.068160146191137
67	Experiment 3_080320/NM IIB-KO/Snap-4387.czi	162	0.554247240677006	1	89.788052989675	2352.10532755541	NM IIB-KO	80320	0.00498047775625	0.068874466675508
71	Experiment 3_080320/NM IIB-KO/Snap-4394.czi	168	0.510291450109115	1	85.7289636183313	2325.94287790182	NM IIB-KO	80320	0.00498047775625	0.072228772940266
72	Experiment 3_080320/NM IIB-KO/Snap-4379.czi	134	0.563611676834142	1	75.523964695775	2011.14680084029	NM IIB-KO	80320	0.00498047775625	0.06662865184382
74	Experiment 3_080320/NM IIB-KO/Snap-4375.czi	226	0.477993639526825	1	108.026562533062	3306.41467043047	NM IIB-KO	80320	0.00498047775625	0.068351983198338
75	Experiment 3_080320/NM IIB-KO/Snap-4377.czi	133	0.457043090338581	1	60.7867310150313	2503.60648042277	NM IIB-KO	80320	0.00498047775625	0.053123364650159
78	Experiment 3_080320/NM IIB-KO/Snap-4389.czi	113	0.513738484308407	1	58.05244872685	1895.6893654949	NM IIB-KO	80320	0.00498047775625	0.059608922251088
79	Experiment 3_080320/NM IIB-KO/Snap-4383.czi	118	0.490872511060911	1	57.9229563051875	2547.96759579769	NM IIB-KO	80320	0.00498047775625	0.046311420990838
82	Experiment 2_040320/NM IIB-KO/Snap-4442.czi	97	0.506468377192268	1	49.12743258765	1974.63491840922	NM IIB-KO	40320	0.00498047775625	0.049123004508673
83	Experiment 2_040320/NM IIB-KO/Snap-4457.czi	104	0.699326121870373	1	72.7299166745187	1724.93866609962	NM IIB-KO	40320	0.00498047775625	0.060291998807796
84	Experiment 2_040320/NM IIB-KO/Snap-4456.czi	140	0.551410037299107	1	77.197405221875	2654.88849226887	NM IIB-KO	40320	0.00498047775625	0.052732911535714
85	Experiment 2_040320/NM IIB-KO/Snap-4447.czi	106	0.678049759438149	1	71.8732745004437	1694.44818127586	NM IIB-KO	40320	0.00498047775625	0.062557239089003
88	Experiment 2_040320/NM IIB-KO/Snap-4458.czi	64	0.540148376658301	1	34.5694961061312	1401.32714340952	NM IIB-KO	40320	0.00498047775625	0.045670991460483
89	Experiment 2_040320/NM IIB-KO/Snap-4461.czi	35	0.373251232989821	1	13.0637931546437	1905.16721466504	NM IIB-KO	40320	0.00498047775625	0.018371090857846
92	Experiment 2_040320/NM IIB-KO/Snap-4448.czi	95	0.560329960618947	1	53.2313462588	1586.52620877568	NM IIB-KO	40320	0.00498047775625	0.059879250323454
93	Experiment 2_040320/NM IIB-KO/Snap-4460.czi	89	0.473872872358708	1	42.174685639925	1694.30374742093	NM IIB-KO	40320	0.00498047775625	0.052528951869153
94	Experiment 2_040320/NM IIB-KO/Snap-4452.czi	119	0.611552445162395	1	72.774740974325	2230.36252928163	NM IIB-KO	40320	0.00498047775625	0.053354554893069
95	Experiment 2_040320/NM IIB-KO/Snap-4331.czi	98	0.571992623944834	1	56.0552771465938	1753.47182316518	NM IIB-KO	40320	0.00498047775625	0.055889121630196
96	Experiment 2_040320/NM IIB-KO/Snap-4453.czi	74	0.430474807148311	1	31.855135728975	1298.80898927487	NM IIB-KO	40320	0.00498047775625	0.056975275510924
97	Experiment 2_040320/NM IIB-KO/Snap-4451.czi	144	0.579395578977083	1	83.4329633727	2655.62560297679	NM IIB-KO	40320	0.00498047775625	0.05422451110525
103	Experiment 1_270220/NM IIB-KO/Snap-4349.czi	154	0.485176151293912	1	74.7171272992625	2069.99114553038	NM IIB-KO	270220	0.00498047775625	0.074396453498134
106	Experiment 1_270220/NM IIB-KO/Snap-4353.czi	149	0.579373294960277	1	86.3266209490812	1872.76422638288	NM IIB-KO	270220	0.00498047775625	0.079561536845342
112	Experiment 1_270220/NM IIB-KO/Snap-4334.czi	110	0.556681581937216	1	61.2349740130937	1722.08983282305	NM IIB-KO	270220	0.00498047775625	0.063875877961416
123	Experiment 3_080320/WT/Snap-4373.czi	126	0.767586488481101	1	96.7158975486187	2435.82715863797	WT	80320	0.00498047775625	0.051727808171108
125	Experiment 3_080320/WT/Snap-4353.czi	100	0.951321056221312	1	95.1321056221313	2046.7771387085	WT	80320	0.00498047775625	0.048857297704185
128	Experiment 3_080320/WT/Snap-4360.czi	119	0.628502810635347	1	74.7918344656062	1906.61653369211	WT	80320	0.00498047775625	0.062414228502236
131	Experiment 3_080320/WT/Snap-4358.czi	120	0.686641866661667	1	82.3970239994	2589.6890579618	WT	80320	0.00498047775625	0.046337609386374
132	Experiment 3_080320/WT/Snap-4368.czi	64	1.00325498802461	1	64.208319233575	1814.35318325758	WT	80320	0.00498047775625	0.035274278784625
134	Experiment 3_080320/WT/Snap-4371.czi	116	0.73290306292403	1	85.0167552991875	1903.69299324919	WT	80320	0.00498047775625	0.06093419496282
138	Experiment 3_080320/WT/Snap-4367.czi	116	0.975830159000431	1	113.19629844405	2333.37375071415	WT	80320	0.00498047775625	0.049713424591537
140	Experiment 2_040320/WT/Snap-4415.czi	90	0.934724997564653	1	84.1252497808187	1784.07187849958	WT	40320	0.00498047775625	0.050446397975675
141	Experiment 2_040320/WT/Snap-4401.czi	98	1.32902524289483	1	130.244473803694	1439.96568984251	WT	40320	0.00498047775625	0.068057177119768
142	Experiment 2_040320/WT/Snap-4421.czi	129	1.39225587882272	1	179.601008368131	2128.94506073111	WT	40320	0.00498047775625	0.060593390773409
143	Experiment 2_040320/WT/Snap-4408.czi	133	0.950746990627303	1	126.449349753431	1455.80858958514	WT	40320	0.00498047775625	0.091358164082478
144	Experiment 2_040320/WT/Snap-4419.czi	243	1.1587501663677	1	281.57629042735	2392.16331014892	WT	40320	0.00498047775625	0.101581693427474
145	Experiment 2_040320/WT/Snap-4409.czi	188	1.01734205742294	1	191.260306795513	2320.37470377034	WT	40320	0.00498047775625	0.081021396972878
146	Experiment 2_040320/WT/Snap-4416.czi	159	0.8833613409057	1	140.454453204006	2354.33160111245	WT	40320	0.00498047775625	0.067535091456476
150	Experiment 2_040320/WT/Snap-4423.czi	126	1.16922644468155	1	147.322532029875	1801.00052239308	WT	40320	0.00498047775625	0.069961112411327
151	Experiment 2_040320/WT/Snap-4410.czi	91	1.37264156183242	1	124.91038212675	1658.94733582931	WT	40320	0.00498047775625	0.054854061991371
153	Experiment 2_040320/WT/Snap-4414.czi	82	1.01449902393468	1	83.1889199626438	2251.19088725827	WT	40320	0.00498047775625	0.036425165215495
155	Experiment 2_040320/WT/Snap-4413.czi	170	0.835841355210662	1	142.093030385813	2688.27263466901	WT	40320	0.00498047775625	0.063237633641623
157	Experiment 2_040320/WT/Snap-4399.czi	109	1.45489350675923	1	158.583392236756	1942.44609067058	WT	40320	0.00498047775625	0.056114813442452
158	Experiment 2_040320/WT/Snap-4400.czi	145	1.31251045532293	1	190.314016021825	2026.42690659646	WT	40320	0.00498047775625	0.071554517721806
159	Experiment 2_040320/WT/Snap-4405.czi	130	0.928399365132356	1	120.691917467206	2058.69044150145	WT	40320	0.00498047775625	0.063146939131455
163	Experiment 1_270220/WT/Experiment-1635-Orthogonal Projection-04.czi	217	0.648219508155616	1	140.663633269769	2810.38398829675	WT	270220	0.00498047775625	0.077213647993887
165	Experiment 1_270220/WT/Snap-4376.czi	108	0.521705044967187	1	56.3441448564562	2115.3882002786	WT	270220	0.00498047775625	0.05105445893372
166	Experiment 1_270220/WT/Experiment-1634-Orthogonal Projection-03.czi	128	0.653376425648047	1	83.63218248295	2646.27724622831	WT	270220	0.00498047775625	0.048369837356398
169	Experiment 1_270220/WT/Experiment-1648-Orthogonal Projection-19.czi	81	0.675930765116744	1	54.7503919744563	2786.86119185398	WT	270220	0.00498047775625	0.029064956746595
170	Experiment 1_270220/WT/Experiment-1636-Orthogonal Projection-05.czi	63	0.417095248285318	1	26.277000641975	2125.60814063443	WT	270220	0.00498047775625	0.029638576742182
171	Experiment 1_270220/WT/Snap-4378.czi	128	0.519487175966357	1	66.4943585236937	2004.56758972428	WT	270220	0.00498047775625	0.06385417017423
173	Experiment 1_270220/WT/Experiment-1649-Orthogonal Projection-21.czi	29	0.400327367235129	1	11.6094936498188	2460.85405936312	WT	270220	0.00498047775625	0.011784526550715
174	Experiment 1_270220/WT/Snap-4375.czi	113	0.496240699624945	1	56.0751990576187	2059.26817692117	WT	270220	0.00498047775625	0.054873863087103
175	Experiment 1_270220/WT/Snap-4377.czi	92	0.550992419599049	1	50.6913026031125	1771.68543031979	WT	270220	0.00498047775625	0.051927954266348
179	Experiment 1_270220/WT/Experiment-1642-Orthogonal Projection-11.czi	171	0.643530152189145	1	110.043656024344	2930.69240897672	WT	270220	0.00498047775625	0.058347986119671
180	Experiment 4_unknowndate/NM IIB-KO/Image46.tif	255	0.6331884938352	1	161.463065927976	1905.61840020179	NM IIB-KO	unknowndate	0.019462761081	0.133814828809901
181	Experiment 4_unknowndate/NM IIB-KO/KO1.tif	124	0.736602723815589	1	91.338737753133	1489.75758418406	NM IIB-KO	unknowndate	0.019462761081	0.083235018446249
182	Experiment 4_unknowndate/NM IIB-KO/Image48.tif	280	0.552811924561403	1	154.787338877193	1992.09144768467	NM IIB-KO	unknowndate	0.019462761081	0.140555796434663
184	Experiment 4_unknowndate/NM IIB-KO/KO4.tif	141	0.649862972832255	1	91.630679169348	2780.17756937653	NM IIB-KO	unknowndate	0.019462761081	0.050716185021096
185	Experiment 4_unknowndate/NM IIB-KO/Image49.tif	217	0.565855113640686	1	122.790559660029	1651.08441078447	NM IIB-KO	unknowndate	0.019462761081	0.131428774072731
186	Experiment 4_unknowndate/NM IIB-KO/KO5.tif	105	0.614837890530257	1	64.557978505677	2597.9672001362	NM IIB-KO	unknowndate	0.019462761081	0.040416214644471
187	Experiment 4_unknowndate/NM IIB-KO/Image50.tif	394	0.734743929743132	1	289.489108318794	2930.25492007212	NM IIB-KO	unknowndate	0.019462761081	0.134459291340531
188	Experiment 4_unknowndate/NM IIB-KO/Image44.tif	221	0.565300739271217	1	124.931463378939	1840.90471960747	NM IIB-KO	unknowndate	0.019462761081	0.120049667778093
190	Experiment 4_unknowndate/NM IIB-KO/KO3.tif	151	0.810733557612516	1	122.42076719949	2291.52602691586	NM IIB-KO	unknowndate	0.019462761081	0.065894953068995
191	Experiment 4_unknowndate/NM IIB-KO/KO2.tif	159	0.654634253215019	1	104.086846261188	2170.72066888609	NM IIB-KO	unknowndate	0.019462761081	0.073247563483878
192	Experiment 3_080320/NM IIC-KO/Snap-4421.czi	140	0.778235224255178	1	108.952931395725	1788.00147544926	NM IIC-KO	80320	0.00498047775625	0.078299711673797
193	Experiment 3_080320/NM IIC-KO/Snap-4422.czi	100	0.9893221015015	1	98.93221015015	1517.03858312048	NM IIC-KO	80320	0.00498047775625	0.065917901569982
195	Experiment 3_080320/NM IIC-KO/Snap-4424.czi	64	1.3193596856166	1	84.4390198794625	1397.70633608073	NM IIC-KO	80320	0.00498047775625	0.045789303767099
196	Experiment 3_080320/NM IIC-KO/Snap-4426.czi	40	2.16576075230531	1	86.6304300922125	1601.51744682199	NM IIC-KO	80320	0.00498047775625	0.024976312358866
197	Experiment 3_080320/NM IIC-KO/Snap-4432.czi	62	1.3954174049003	1	86.5158791038187	1345.82469929388	NM IIC-KO	80320	0.00498047775625	0.046068407001692
198	Experiment 3_080320/NM IIC-KO/Snap-4425.czi	112	0.747560817502846	1	83.7268115603188	1723.92762911511	NM IIC-KO	80320	0.00498047775625	0.064967924469944
199	Experiment 3_080320/NM IIC-KO/Snap-4428.czi	74	1.37999616100203	1	102.11971591415	1602.66793718369	NM IIC-KO	80320	0.00498047775625	0.046173008321386
200	Experiment 3_080320/NM IIC-KO/Snap-4429.czi	32	2.19825836966484	1	70.344267829275	928.764472463256	NM IIC-KO	80320	0.00498047775625	0.034454375623488
201	Experiment 3_080320/NM IIC-KO/Snap-4423.czi	156	0.930998152884655	1	145.235711850006	2108.18642944306	NM IIC-KO	80320	0.00498047775625	0.073997250822458
203	Experiment 3_080320/NM IIC-KO/Snap-4433.czi	88	0.922293926316477	1	81.16186551585	1433.08765006113	NM IIC-KO	80320	0.00498047775625	0.061405874229847
204	Experiment 3_080320/NM IIC-KO/Snap-4427.czi	81	1.2569250159662	1	101.810926293263	1697.04301018687	NM IIC-KO	80320	0.00498047775625	0.047730080801594
205	Experiment 3_080320/NM IIC-KO/Snap-4430.czi	158	0.90736108995985	1	143.363052213656	1780.16718393868	NM IIC-KO	80320	0.00498047775625	0.088755708691596
206	Experiment 3_080320/NM IIC-KO/Experiment-1632-Orthogonal Projection-01.czi	151	0.812015774047144	1	122.614381881119	2665.88040667691	NM IIC-KO	80320	0.00498047775625	0.056641700663619
207	Experiment 3_080320/NM IIC-KO/Snap-4431.czi	55	1.43809031358193	1	79.0949672470063	1289.46561300415	NM IIC-KO	80320	0.00498047775625	0.042653328204591
208	Experiment 2_040320/NM IIC-KO/Snap-4341.czi	194	1.23210344822529	1	239.028068955706	2990.0397819202	NM IIC-KO	40320	0.00498047775625	0.064882079888387
209	Experiment 2_040320/NM IIC-KO/Snap-4343.czi	177	1.10521584920897	1	195.623205309988	1434.52202765493	NM IIC-KO	40320	0.00498047775625	0.12338604537802
210	Experiment 2_040320/NM IIC-KO/Snap-4349.czi	169	1.18921431300566	1	200.977218897956	2375.8871088415	NM IIC-KO	40320	0.00498047775625	0.071131325798727
211	Experiment 2_040320/NM IIC-KO/Snap-4351.czi	245	1.10763792450936	1	271.371291504794	2090.67506965209	NM IIC-KO	40320	0.00498047775625	0.117187028991918
212	Experiment 2_040320/NM IIC-KO/Snap-4340.czi	239	1.13754945505513	1	271.874319758175	1936.79822889499	NM IIC-KO	40320	0.00498047775625	0.123399534569152
213	Experiment 2_040320/NM IIC-KO/Snap-4345.czi	160	0.918524610196406	1	146.963937631425	1244.18310924433	NM IIC-KO	40320	0.00498047775625	0.12859843443557
214	Experiment 2_040320/NM IIC-KO/Snap-4348.czi	296	1.31917039380999	1	390.474436567756	2201.55046546172	NM IIC-KO	40320	0.00498047775625	0.134450699470076
215	Experiment 2_040320/NM IIC-KO/Snap-4342.czi	250	1.04054133474678	1	260.135333686694	2694.08983268831	NM IIC-KO	40320	0.00498047775625	0.092795717858649
216	Experiment 2_040320/NM IIC-KO/Snap-4337.czi	155	1.35388664683609	1	209.852430259594	2095.34675778745	NM IIC-KO	40320	0.00498047775625	0.073973436341234
217	Experiment 2_040320/NM IIC-KO/Snap-4332.czi	147	0.532402907902806	1	78.2632274617125	1965.91410185802	NM IIC-KO	40320	0.00498047775625	0.074774375879937
218	Experiment 2_040320/NM IIC-KO/Snap-4334.czi	149	0.42086708341573	1	62.7091954289437	2579.11550368528	NM IIC-KO	40320	0.00498047775625	0.057771743757538
219	Experiment 2_040320/NM IIC-KO/Snap-4344.czi	270	1.14691179619481	1	309.6661849726	1838.64297327481	NM IIC-KO	40320	0.00498047775625	0.146847432549182
220	Experiment 2_040320/NM IIC-KO/Snap-4336.czi	174	0.768710980585345	1	133.75571062185	2211.95468349453	NM IIC-KO	40320	0.00498047775625	0.078663456036589
221	Experiment 2_040320/NM IIC-KO/Snap-4350.czi	129	1.60309610383731	1	206.799397395012	2255.85759491587	NM IIC-KO	40320	0.00498047775625	0.057184460708306
222	Experiment 2_040320/NM IIC-KO/Snap-4339.czi	260	1.15575817470517	1	300.497125423344	1739.86017745735	NM IIC-KO	40320	0.00498047775625	0.14943729580613
223	Experiment 2_040320/NM IIC-KO/Snap-4346.czi	159	1.08066970182783	1	171.826482590625	2155.19217850655	NM IIC-KO	40320	0.00498047775625	0.073775323419269
224	Experiment 2_040320/NM IIC-KO/Snap-4347.czi	254	1.10776413716277	1	281.372090839344	1798.4704396929	NM IIC-KO	40320	0.00498047775625	0.14123112306665
225	Experiment 2_040320/NM IIC-KO/Snap-4352.czi	273	1.07311964314336	1	292.961662578137	2056.17031975679	NM IIC-KO	40320	0.00498047775625	0.132771102362907
226	Experiment 2_040320/NM IIC-KO/Snap-4333.czi	105	0.615729350036964	1	64.6515817538812	2054.78574694055	NM IIC-KO	40320	0.00498047775625	0.051100218188849
227	Experiment 2_040320/NM IIC-KO/Snap-4338.czi	239	1.14215483406823	1	272.975005342306	2003.61133799508	NM IIC-KO	40320	0.00498047775625	0.119284611475176
228	Experiment 1_270220/NM IIC-KO/Snap-4363.czi	172	0.671235202718786	1	115.452454867631	1794.60060847629	NM IIC-KO	270220	0.00498047775625	0.095843052313482
230	Experiment 1_270220/NM IIC-KO/Snap-4359.czi	217	0.556206902972177	1	120.696897944963	2227.55353982711	NM IIC-KO	270220	0.00498047775625	0.097416289269906
232	Experiment 1_270220/NM IIC-KO/Snap-4357.czi	104	0.660056970330709	1	68.6459249143937	2008.70636673972	NM IIC-KO	270220	0.00498047775625	0.05177461560437
233	Experiment 1_270220/NM IIC-KO/Snap-4369.czi	103	0.730873022191444	1	75.2799212857187	1635.07092546585	NM IIC-KO	270220	0.00498047775625	0.062994209239366
234	Experiment 1_270220/NM IIC-KO/Snap-4355.czi	171	0.524814202864729	1	89.7432286898687	2014.68294004722	NM IIC-KO	270220	0.00498047775625	0.084876878937582
235	Experiment 1_270220/NM IIC-KO/Snap-4360.czi	93	0.51796968665	1	48.17118085845	1911.82113294739	NM IIC-KO	270220	0.00498047775625	0.048644718063465
236	Experiment 1_270220/NM IIC-KO/Snap-4362.czi	194	0.580482384260664	1	112.613582546569	2414.98883970582	NM IIC-KO	270220	0.00498047775625	0.080331634171706
237	Experiment 1_270220/NM IIC-KO/Snap-4370.czi	156	0.494567826423518	1	77.1525809220688	2387.78547020118	NM IIC-KO	270220	0.00498047775625	0.065332502415662
238	Experiment 1_270220/NM IIC-KO/Snap-4358.czi	162	0.70550619475571	1	114.292003550425	2358.20143232906	NM IIC-KO	270220	0.00498047775625	0.068696421679298
239	Experiment 1_270220/NM IIC-KO/Snap-4368.czi	164	0.552863399710556	1	90.6695975525313	1778.02557850349	NM IIC-KO	270220	0.00498047775625	0.092237143257542
240	Experiment 1_270220/NM IIC-KO/Snap-4366.czi	92	0.512231310104755	1	47.1252805296375	1391.79450898406	NM IIC-KO	270220	0.00498047775625	0.06610171214654
241	Experiment 1_270220/NM IIC-KO/Snap-4371.czi	96	0.504273372820312	1	48.41024379075	1746.52405669521	NM IIC-KO	270220	0.00498047775625	0.054966319892354
242	Experiment 1_270220/NM IIC-KO/Snap-4365.czi	98	0.568536782236416	1	55.7166046591687	1760.10581953651	NM IIC-KO	270220	0.00498047775625	0.055678470528441
243	Experiment 1_270220/NM IIC-KO/Snap-4356.czi	116	0.629257603410345	1	72.9938819956	2056.79287947632	NM IIC-KO	270220	0.00498047775625	0.056398483851974
245	Experiment 1_270220/NM IIC-KO/Snap-4367.czi	160	0.965527869021016	1	154.484459043363	2623.73062342577	NM IIC-KO	270220	0.00498047775625	0.060981870078983
246	Experiment 1_270220/NM IIC-KO/Snap-4354.czi	122	0.569284936974641	1	69.4527623109063	2031.23306763124	NM IIC-KO	270220	0.00498047775625	0.060062039134816
247	Experiment 2/NMIIA-KO_NMIIB-GFP_Pax-Cy3_Pha_DAPI_15-04-21_1.tif	40	0.252716725538856	1	10.1086690215542	2318.16214412484	NMIIA-KO_NMIIB-GFP	Experiment 2	0.00124598410225	0.017255048401759
248	Experiment 2/NMIIA-KO_NMIIB-GFP_Pax-Cy3_Pha_DAPI_15-04-21_10.tif	87	0.423348161638046	1	36.83129006251	2484.98072565458	NMIIA-KO_NMIIB-GFP	Experiment 2	0.00124598410225	0.035010331911964
249	Experiment 2/NMIIA-KO_NMIIB-GFP_Pax-Cy3_Pha_DAPI_15-04-21_6.tif	47	0.255400230661202	1	12.0038108410765	1991.9136667917	NMIIA-KO_NMIIB-GFP	Experiment 2	0.00124598410225	0.023595400133833
250	Experiment 2/NMIIA-KO_NMIIB-GFP_Pax-Cy3_Pha_DAPI_15-04-21_9.tif	77	0.254277846529305	1	19.5793941827565	2797.41497724608	NMIIA-KO_NMIIB-GFP	Experiment 2	0.00124598410225	0.027525412077333
251	Experiment 2/NMIIA-KO_NMIIB-GFP_Pax-Cy3_Pha_DAPI_15-04-21_7.tif	82	0.405355096289308	1	33.2391178957232	2808.96151192163	NMIIA-KO_NMIIB-GFP	Experiment 2	0.00124598410225	0.029192283216406
252	Experiment 2/NMIIA-KO_NMIIB-GFP_Pax-Cy3_Pha_DAPI_15-04-21_3.tif	36	0.177691177248653	1	6.3968823809515	2770.42696159134	NMIIA-KO_NMIIB-GFP	Experiment 2	0.00124598410225	0.012994386966015
253	Experiment 2/NMIIA-KO_NMIIB-GFP_Pax-Cy3_Pha_DAPI_15-04-21_5.tif	90	0.554033753199364	1	49.8630377879428	2913.8285179034	NMIIA-KO_NMIIB-GFP	Experiment 2	0.00124598410225	0.03088719855922
254	Experiment 2/NMIIA-KO_NMIIB-GFP_Pax-Cy3_Pha_DAPI_15-04-21_2.tif	76	0.382664670139701	1	29.0825149306172	2935.47998364819	NMIIA-KO_NMIIB-GFP	Experiment 2	0.00124598410225	0.025890144175178
255	Experiment 2/NMIIA-KO_NMIIB-GFP_Pax-Cy3_Pha_DAPI_15-04-21_8.tif	42	0.664880849991119	1	27.924995699627	3446.6686352942	NMIIA-KO_NMIIB-GFP	Experiment 2	0.00124598410225	0.012185679693695
256	Experiment 2/NMIIA-KO_NMIIB-GFP_Pax-Cy3_Pha_DAPI_15-04-21_4.tif	28	0.305355103915696	1	8.5499429096395	3281.69286425169	NMIIA-KO_NMIIB-GFP	Experiment 2	0.00124598410225	0.008532181760521
257	Experiment 2/NMIIA-KO_NMIIB-GFP_Pax-Cy3_Pha_DAPI_15-04-21_14.tif	102	0.342376886449637	1	34.922442417863	2861.61929205092	NMIIA-KO_NMIIB-GFP	Experiment 2	0.00124598410225	0.035644154441976
258	Experiment 2/NMIIA-KO_NMIIB-GFP_Pax-Cy3_Pha_DAPI_15-04-21_11.tif	195	0.331521226467379	1	64.646639161139	2983.13887555926	NMIIA-KO_NMIIB-GFP	Experiment 2	0.00124598410225	0.065367389228047
259	Experiment 3/NMIIA-KO_NMIIB-GFP_Pax-Cy3_Pha_DAPI_22-04-21_1b.tif	67	0.245254303589149	1	16.432038340473	2989.0872036634	NMIIA-KO_NMIIB-GFP	Experiment 3	0.00124598410225	0.022414869635749
260	Experiment 3/NMIIA-KO_NMIIB-GFP_Pax-Cy3_Pha_DAPI_22-04-21_1.tif	64	0.314961418846883	1	20.1575308062005	2706.77087979149	NMIIA-KO_NMIIB-GFP	Experiment 3	0.00124598410225	0.02364440983085
261	Experiment 3/NMIIA-KO_NMIIB-GFP_Pax-Cy3_Pha_DAPI_22-04-21_3.tif	43	0.285562170411017	1	12.2791733276737	3021.37937364141	NMIIA-KO_NMIIB-GFP	Experiment 3	0.00124598410225	0.014231910224559
262	Experiment 3/NMIIA-KO_NMIIB-GFP_Pax-Cy3_Pha_DAPI_22-04-21_2.tif	45	0.374598198207561	1	16.8569189193403	3465.9975866724	NMIIA-KO_NMIIB-GFP	Experiment 3	0.00124598410225	0.012983275052769
263	Experiment 3/NMIIA-KO_NMIIB-GFP_Pax-Cy3_Pha_DAPI_22-04-21_4.tif	27	0.544771938039305	1	14.7088423270612	3386.90126987747	NMIIA-KO_NMIIB-GFP	Experiment 3	0.00124598410225	0.007971888711411
264	Experiment 3/NMIIA-KO_NMIIB-GFP_Pax-Cy3_Pha_DAPI_22-04-21_5.tif	25	0.49550295778278	1	12.3875739445695	3515.00089542979	NMIIA-KO_NMIIB-GFP	Experiment 3	0.00124598410225	0.007112373721584
265	Experiment 3/NMIIA-KO_NMIIB-GFP_Pax-Cy3_Pha_DAPI_22-04-21_6.tif	35	0.392057797659407	1	13.7220229180792	3093.17920753357	NMIIA-KO_NMIIB-GFP	Experiment 3	0.00124598410225	0.011315218954904
266	Experiment 1/Snap-8434-Airyscan Processing-22.tif	195	0.534201307100046	1	104.169254884509	4228.66196369142	NMIIA-KO_NMIIB-GFP	Experiment 1	0.00124598410225	0.046113877551417
267	Experiment 1/Snap-8429-Airyscan Processing-19b.tif	99	0.377759725545795	1	37.3982128290337	5130.27225787285	NMIIA-KO_NMIIB-GFP	Experiment 1	0.00124598410225	0.019297221477491
268	Experiment 1/Snap-8439-Airyscan Processing-27.tif	66	0.565016033276367	1	37.2910581962402	5023.23599356907	NMIIA-KO_NMIIB-GFP	Experiment 1	0.00124598410225	0.013138940731532
269	Experiment 1/Snap-8432-Airyscan Processing-21b.tif	58	0.429005215895388	1	24.8823025219325	5310.4378211059	NMIIA-KO_NMIIB-GFP	Experiment 1	0.00124598410225	0.010921886660547
270	Experiment 1/Snap-8428-Airyscan Processing-18.tif	90	0.815690414671864	1	73.4121373204677	4736.37058173985	NMIIA-KO_NMIIB-GFP	Experiment 1	0.00124598410225	0.019001891521533
271	Experiment 1/Snap-8431-Airyscan Processing-20b.tif	56	0.624260284943362	1	34.9585759568282	4703.60493780298	NMIIA-KO_NMIIB-GFP	Experiment 1	0.00124598410225	0.011905761801959
272	Experiment 1/Snap-8429-Airyscan Processing-19.tif	56	0.644396278024366	1	36.0861915693645	5263.46795840338	NMIIA-KO_NMIIB-GFP	Experiment 1	0.00124598410225	0.010639373212217
273	Experiment 1/Snap-8440-Airyscan Processing-28.tif	78	0.343092904463147	1	26.7612465481255	4213.17313531635	NMIIA-KO_NMIIB-GFP	Experiment 1	0.00124598410225	0.018513362137002
274	Experiment 1/Snap-8442-Airyscan Processing-30.tif	79	0.353212835061883	1	27.9038139698887	4337.50864289578	NMIIA-KO_NMIIB-GFP	Experiment 1	0.00124598410225	0.018213220192516
275	Experiment 1/Snap-8438-Airyscan Processing-26.tif	65	0.291349421078427	1	18.9377123700977	4012.00277208758	NMIIA-KO_NMIIB-GFP	Experiment 1	0.00124598410225	0.016201384618231
276	Experiment 1/Snap-8435-Airyscan Processing-23.tif	173	0.478659557430838	1	82.808103435535	4680.28883729757	NMIIA-KO_NMIIB-GFP	Experiment 1	0.00124598410225	0.036963530673866
277	Experiment 1/Snap-8431-Airyscan Processing-20.tif	56	0.577424632528428	1	32.335779421592	4607.9270645753	NMIIA-KO_NMIIB-GFP	Experiment 1	0.00124598410225	0.012152970134991
278	Experiment 1/Snap-8439-Airyscan Processing-27b.tif	72	0.422682801353559	1	30.4331616974562	5023.04660398552	NMIIA-KO_NMIIB-GFP	Experiment 1	0.00124598410225	0.014333930316886
279	Experiment 1/Snap-8432-Airyscan Processing-21.tif	51	0.371914038991211	1	18.9676159885517	5204.15039324756	NMIIA-KO_NMIIB-GFP	Experiment 1	0.00124598410225	0.009799870516074
280	Experiment 1/Snap-8436-Airyscan Processing-24b.tif	76	0.513886469539819	1	39.0553716850262	5039.73406906696	NMIIA-KO_NMIIB-GFP	Experiment 1	0.00124598410225	0.015080160770084
281	Experiment 1/Snap-8436-Airyscan Processing-24.tif	66	0.616894280442776	1	40.7150225092232	5135.39574450131	NMIIA-KO_NMIIB-GFP	Experiment 1	0.00124598410225	0.012851979337847
282	Experiment 1/Snap-8437-Airyscan Processing-25.tif	135	0.52798345595047	1	71.2777665533135	4722.44047947669	NMIIA-KO_NMIIB-GFP	Experiment 1	0.00124598410225	0.028586914030298
