# Supplementary material for: Distinct roles of nonmuscle myosin II isoforms for establishing tension and elasticity during cell morphodynamics
Source: eLife journal article supplement (doi:10.7554/elife.71888), 2021-08-10
Supplement: data1 [file Figure 1_figure supplement 3&4_source data.xlsx]

## Sheet: Tabelle1
Cell line	WT	NM IIB-KO	NM IIC-KO		WT	NM IIA-KO	NM IIC-KO		WT	NM IIA-KO	NM IIB-KO
Intensity	NM IIA	NM IIA	NM IIA		NM IIB	NM IIB	NM IIB		NM IIC	NM IIC	NM IIC
	1353.87	1078.18	1071.47		703.581	1350.42	740.295		344.618	418.623	648.43
	991.696	2052.12	1226.71		199.632	328.87	507.841		169.977	227.457	525.25
	944.642	731.853	1180.2		759.917	493.801	679.242		72.348	570.345	555.853
	1162.6	1850.03	1417.42		1017.98	885.08	1429.13		241.528	250.742	563.427
	349.633	738.654	1604.33		605.123	636.853	581.417		101.094	177.42	254.313
	1206.71	1396.03	1527.89		163.807	823.822	740.187		406.503	100.01	569.202
	1485.08	1546.01	1187.3		786.284	1482.2	2049.68		245.167	307.746	752.1
	1396.59	1352.27	1553.68		734.669	624.839	843.399		168.559	146.413	683.666
	1209.56	1076.26	1231.32		443.792	1354.8	603.959		288.297	153.977	644.949
	782.32	1218.77	1710.32		765.723	722.778	957.682		222.174	587.742	787.5
	1276.33	1127.75	2216.95		584.343	701.104	373.238		97.861	305.567	704
	956.496	1508.38	1640.18		1135.13	627.334	892.287		276.251	288.487	553.65
	1608.83	1426.97	1889.72		532.012	563.054	457.368		162.42	363.142	457.94
	946.615	917.58	1395.2		725.027	925.065	453.696		570.218	522.766	631.201
	1124.51	1139.58	1505.81		1813.62	693.59	432.904		349.557	210.633	370.596
	1392.93	1662.94	1238.53		1511.43	1322.03	1150.48		286.187	515.142	815.721
	1780.42	1532.65	912.389		1095.97	1108.68	765.685		240.389	755.14	593.868
	1503.03	1470.25	1104.51		499.709	648.757	296.069		210.128	458.045	795.516
	1488.51	1197.66	1262.82		740.099	1049.36	454.973		214.49	759.248	627.717
	1601.59	2344.01	1874.07		833.959	838.856	347.152		547.847	395.146	899.961
	1420.48	1906.75	1276.68		651.012	1103.02	1842.06		522.168	430.177	1048.82
	1168.76	1318.64	1252.4		508.2	2097.26	718.155		387.875	862.023	1847.4
	944.076	1475.48	1160.71		322.124	873.108	683.138		207.011	707.665	1281.51
	1163.23	908.055	1408.3		551.864	627.243	1141.4		1011.34	866.078	517.617
	1498.53	1023.51	1827.51		908.924	1413.59	724.267		430.619	813.721	159.218
	2078.81	1151.7	1394.61		959.478	1540.31	733.267		199.123	1749.8	282.203
	1281.98	1261.85	1026.58		1018.56	1178.17	673.126		627.195	493.338	387.199
	1260.47	1230.04	1078.21		1285.63	452.666	444.106		548.98	395.582	813.531
	995.403	1062.56	1044.98		482.931	649.512	815.424		124.801	921.698	427.956
	855.176	2317.45	1605.38		954.44	649.512	515.999		420.355	429.553	754.811
	1383.98	1690.77	1247.27		386.012	853.33	387.453		709.051	1212.51	703.572
	1282.28	1661.27	2078.41		1155.42	920.037	409.492		610.653	1124.69	396.004
	1126.77	1972.81	1534.14		664.551	1004.64	385.068		883.199	697.28	590.766
	989.811	858.449	1516.42		1195.96	769.226	381.718		494.237	692.398	526.954
	1397.43	1241.67	1092.45		1137.77	1218.24	803.489		344.916	554.515	352.964
	2112.08	1469.86	1322.13		930.724	1185.67	505.383		232.718	1081.88	435.092
	1446.98	1300	1441.45		956.725	1021.89	705.205		677.828	853.42	218.166
	1880.25	1234.5	947.913		773.694	1025.4	701.325		967.772	708.481	199.6
	1606.12	1282.64	1127.01		537.82	950.692	1078.93		815.864	781.425	604.775
	809.686	2153.92	925.515		752.862	803.626	601.198		546.57	645.354	395.621
	1669.27	1607.64	1034.01		535.879	967.27	1113.13		331.189	581.196	362.81
	1198.86	1333.73	1604.05		1382.95	854.682	1126.74		294.012	810.468	275.212
	1167.53	1640.2	1098.66		425.449	1563.76	596.268		398.775	810.098	298.318
	2076.32	1512.76	1429.02		898.811	1341.81	953.126		318.116	997.893	117.914
	1828.4	1335.96	1000.54		1228.79	679.766	648.278		613.062	1103.47	158.196
	2113.19	982.239	1097.76		525.549	464.645	659.825		301.342	754.966	119.749
	1491.48	1102.76	1300.97		575.288	425.539	710.4		539.098	511.84	277.398
	1161.78	808.208	1436.94		500.094	457.165	122.538		762.437	390.6	421.35
	1989.04	1520.1	1133.63		836.627	534.878	1571.24		414.614	1641.97	235.087
	1326.91	1572.04	1745.92		581.638	1186.38	790.079		281.058	620.466	505.387
	2190.71	2597.94	1040.03		582.436	784.977	982.01		138.747	697.67	527.639
	1157.34	1021.99	1473.84		732.006	925.091	1080.17		707.4	761.896	1190.79
	1692.14	1178.76	1256.93		446.731	542.308	807.78		807.345	503.381	1807.11
	1268.1	997.153	1349.63		456.069	695.384	707.985		889.8	370.256	1177.85
	879.372	1182.87	1324.83		342.008	647.282	655.643		759.644	292.95	617.747
	868.073	852.109	1651.79		551.654	412.721	911.566		711.953	1202.01	1125.14
	706.117	2012.79	1332.85		496.446	752.311	566.727		863.123	1937.5	656.125
	1008.31	878.3	1174.81		578.964	320.819	922.012		732.028	854.25	878.104
	1171.41	1288.93	1499.07		505.527	338.774	546.264		809.127	528.124	1194.61
	1217.17	1238.54	848.194		561.17	1566.45	682.667		695.701	1263.58	1282.22
	1002.14	1238.54	927.372		420.183	915.205	197.169		1122.06	901.503	770.31
	1084.88	1397.82	1501.48		421.256	528.56	1476.95		968.57	1127.67	777.107
	1044.72	926.386	1290.05		308.33	774.982	645.372		768.172	722.366	1041.56
	1147.61	1977.74	976.125		599.571	488.458	971.819		964.741	736.757	391.126
	1065.46	1413.07	1090.07		217.66	865.751	436.794		613.075	554.116	658.63
	1134.45	1135.91	1524.49		271.21	307.139	629.883		612.839	680.877	917.736
	1416.45	1278.33	1101.75		720.381	424.485	609.141		296.99	749.371	1352.19
	916.028	831.665	1194.76		482.936	927.54	316.436		525.741	876.2	633.561
	900.054	1271.66	936.543		392.795	527.774	508.252		439.872	819.441	1096.3
	1057.55	1305.85	1057.93		793.616	460.653	885.181				633.259
	659.509	1058.72	964.677		571.206	1721.31	624.592				707.15
	922.38	1117.1	1543.96		791.22	500.592	541.546				1620.73
	741.948	1112.74	1243.03		543.294	449.232	410.191				1492.33
	797.623	1055.81	929.6		485.13	959.55	576.038				1058.82
	905.322	1000.34	1376.01		794.672		824.651
	1224.75	942.681	1008.24		665.649		540.917
	938.244	1614.65	998.458		605.499		985.861
	873.797	1018.21			486.076		1040.17
	1893.66				495.766		1621.6
	1313.51						599.326
							807.207
