# Supplementary material for: Distinct roles of nonmuscle myosin II isoforms for establishing tension and elasticity during cell morphodynamics
Source: eLife journal article supplement (doi:10.7554/elife.71888), 2021-08-10
Supplement: data1 [file Figure 2B_source data.xlsx]

## Sheet: Tabelle1
Cell line	WT: NM IIA	WT: NM IIB	NM IIA-KO + GFP-NM IIB
	613.369	266.546	2760.12
	247.277	476.356	385.229
	517.032	101.112	1430.88
	915.485	357.23	2361.33
	667.524	302.943	1627.72
	1503.8	211.959	1594.65
	404.131	719.775	2816.29
	1463.2	403.172	1822.88
	645.895	318.818	1192.68
	842.876	486.373	1253.37
	827.143	381.639	2050.73
	1608.74	217.792	1453.94
	320.336	75.312	1917.2
	559.281	443.113	1810.46
	517.402	163.863	2266.5
	1141.86	325.891	1091.23
	574.495	129.838	1174.44
	1789.09	284.111	2678.07
	911.314	241.666	774.878
	1959.18	380.383	549.13
	1404.34	241.383	1069.93
	690.018	136.54	2040.46
	775.892	443.994	3446.38
	223.711	174.269	2431.06
	273.891	240.049	4405.5
	940.865	567.018	2488.5
	1513.97	231.069	3195.78
	570.554	285.794	2473.56
	1393.43	471.959	2653.64
	1057.67	144.302	2992.19
	1318.52	201.857	2425.45
	1979.12	151.514	1734.56
	910.76	452.039	2239.26
	1568.21	906.857	2252.75
	704.199	451.548	4550.77
	1125.53	425.713	1996.48
	2886.44	131.16	885.451
	1131.36	233.9	1083.69
	1101.85	112.725	908.755
	1868.13	291.486	4588.08
	748.998	108.643	4451.72
	785.007	305.592	932.619
	1333.42	262.906	804.569
	1068.74	51.95	1354.13
	1388.3	210.988	911.276
	1260.04	446.692	4636.45
	794.046	173.2	2738.95
	934.131	315.026	3724.73
	753.154	91.002	1303.91
	805.614	71.547	2068.68
	1339.88	225.63	1044.06
	2583.01	262.505	5276.27
	2460.67	363.132	4241.93
	1991.42	616.166	2742.8
	1581.05	639.69	1483.59
	1434.11	292.001	1110.96
	693.801	236.357	2375.68
	1867.86	117.089	2457.82
	1664.86	93.937	1494.91
	1262.77	238.607	2711.63
	2593.77	171.394	1845.26
	1289.33	373.962	3654.03
	1914.6	230.141	2591.52
	932.637	247.904	1079.54
	1411.41	325.39	2518.59
	1691.02	73.359	2296.1
	1350.5	132.386	2225.11
	1857.78	194.137	2607.93
	857.114	401.137	2780.96
	2618.66	292.759	4097.88
	1374.22	300.599	4426.79
	1196.4	247.355	4539.77
	1747.07	319.58	2836.86
	2161.24	287.64	2066.43
	621.583	691.87	4156.23
	1680.84	389.527	3350.93
	2687.77	238.396	1920.45
	1516.09	267.534	707.383
	3151.05	231.887	689.489
	2320.33	444.262	1650.58
	2919.47	149.314	3621.21
	677.11	377.116	2452.34
	2159.66	294.48	2677
	908.469	281.628	2513.25
	1761.95	165.923	2309.83
	2345.39	471.84	1974.3
	2859.56	253.525	4825.03
	978.567	193.047	2617.85
	1114.12	219.174	3535.27
	845.437	359.972
