# Supplementary material for: Distinct roles of nonmuscle myosin II isoforms for establishing tension and elasticity during cell morphodynamics
Source: eLife journal article supplement (doi:10.7554/elife.71888), 2021-08-10
Supplement: data1 [file Figure 2C_source data.xlsx]

## Sheet: Tabelle1
Cell line	WT	NM IIA-KO	NM IIA-KO + NM IIB
	2556.24	364.912	580.136
	3184.95	307.424	536.991
	2111.83	342.389	813.772
	2486.38	428.867	694.244
	3055.85	497.185	1044.58
	2867.49	314.487	698.317
	3777.06	467.471	1067.26
	2090.1	431.849	496.707
	4517.54	451.705	725.533
	4417.25	276.064	980.127
	4133.79	305.212	583
	5087.72	340.535	648.266
	3544.25	374.897	1586.29
	3532.34	397.984	1352.45
	4149.28	354.177	828.395
	2314.68	230.446	1049.63
	2094.52	418.227	1598.69
	2849.13	354.316	912.581
	2163.43	2062.26	2147.29
	3114.25	1331.11	2033.94
	2132.57	496.263	660.357
	2136.57	488.335	696.897
	3281.54	512.197	643.729
	2129.84	488.435	537.059
	4493.64	365.195	1107.19
	5006.86	407.264	640.02
	3287.35	407.273	931.529
	3012.34	274.19	661.979
	3248.82	324.645	1059.71
	5139.12	373.605	1008.08
	3336.93	385.064	1008.91
	3345.83	337.601	432.197
	3843.81	348.024	1456.4
	2946.87	365.393	590.916
	4126.62	228.399	1101.56
	2864.04	367.004	612.711
	3578.1	407.398	701.021
	3739.69	334.879	1143.42
	2274.07	314.287	961.396
	2994.84	254.677	694.056
	1775.82	429.17	462.422
	3504.23	458.518	705.84
	2933.19	849.443	635.812
	1901.42	418.55	1114.18
	2775.7	379.521	755.216
	2722.08	588.166	630.722
	3766.41	568.542	582.494
	3182.87	364.733	772.903
	2992.43	558.928	4529.88
	2286.4	519.252	3714.19
	1498.09	578.873	2273.44
	2686.49	427.793	737.64
	2630.32	897.968	813.088
	2281.2	731.907	708.662
	2832.71	608.696	749.42
	2768.94	512.243	489.238
	1582.99	523.085	1173.29
	1938.08	413.526	366.418
	1315.43	1415.92	2671.58
	1904.45	1386.65	1903.08
	1777.58	549.302	732.82
	1495.32	576.336	655.698
	892.5	630.731	811.663
	1704.55	508.023	342.013
	3295.46	369.444	951.932
	3308.93	384.432	466.572
	3049.93	347.601	786.773
	3510.71	468.542	611.518
	2270.99	400.972	782.215
	1655.96	485.372	1051.97
	2360.65	393.293	536.87
	1854.01	362.113	807.556
	1378.04	438.915	943.843
	1730.36	567.381	511.914
	2084.53	501.853	818.515
	1442.27	485.407	574.69
	2249.15	300.013	1289.59
	2551.76	553.237	1187.85
	2199.43	483.631	1374.25
	1934.47	414.457	580.623
	1853.85	882.826	2766.66
	1707.41	747.899	4880.01
	1082.6	794.315	2869.29
	1054.89	673.904	1668.82
	2692.55	1276.71	650.911
	3007.46	1183.94	641.927
	2682.25	449.908	623.703
	1552.33	608.908	553.535
	1335.82	661.438	782.953
	2087.08	1136.16	672
	1085.23	603.401	664.498
	1554.26	1010.5	711.65
	2507.67	855.684	475.83
	1754.6	1101.72	481.934
	3127.25	809.36	786.188
	1458.6	794.898	596.516
	2087.08	512.718	1373.78
	2481.44	438.438	1403.62
	1670.33	2358.06	1599.96
	2571.61	1921.14	1106.7
	2105.01	1120.94	710.401
	1880.99	719.464	866.306
	1661.08	713.231	933.645
	2143.57	613.157	374.066
	2723.81	647.174	503.445
	2439.19	609.735	507.923
	3547.11	493.019	586.839
	3083.61	672.557	702.071
	2389.04	798.689	330.987
	2072.17	757.279	336.745
	3683.03	591.973	531.942
	2468.9	760.462	275.551
	3481.45	816.466	300.392
	3219.62	831.085	447.175
	1752.88	797.244	397.447
	1805.38	577.057	297.145
	2838.14	856.346	1332.91
	2424.46	406.652	1048.12
	2686.5	556.085	1101.88
	2425.73	789.123	550.306
