# Supplementary material for: Distinct roles of nonmuscle myosin II isoforms for establishing tension and elasticity during cell morphodynamics
Source: eLife journal article supplement (doi:10.7554/elife.71888), 2021-08-10
Supplement: data1 [file Figure 2E_source data.xlsx]

## Sheet: Tabelle2
Column1	Column2	Column3	Column4	Column5	Column6	Column7	Column8	Column9	Column10	Column11
	filename	focaladhesioncount	pixelarea	nucleuscount	totalarea	cellArea	type	date	scaling	FA density
0	Experiment 3_080320/NM IIA-KO/Snap-4415.czi	52	0.530516659459014	1	27.5868662918687	2290.05853566804	NM IIA-KO	80320	0.00498047775625	0.02270684316147
6	Experiment 3_080320/NM IIA-KO/Snap-4411.czi	85	0.713966134822426	1	60.6871214599062	2286.46263072803	NM IIA-KO	80320	0.00498047775625	0.037175328762288
11	Experiment 3_080320/NM IIA-KO/Snap-4403.czi	73	0.551946096548801	1	40.2920650480625	2190.08042518908	NM IIA-KO	80320	0.00498047775625	0.033332109250599
12	Experiment 3_080320/NM IIA-KO/Snap-4412.czi	75	0.375992867411833	1	28.1994650558875	2894.255233712	NM IIA-KO	80320	0.00498047775625	0.025913402220512
15	Experiment 3_080320/NM IIA-KO/Snap-4400.czi	96	0.431018845822135	1	41.377809198925	2697.13788507514	NM IIA-KO	80320	0.00498047775625	0.035593285953686
16	Experiment 3_080320/NM IIA-KO/Snap-4402.czi	30	0.416533956347708	1	12.4960186904313	2220.32188612503	NM IIA-KO	80320	0.00498047775625	0.013511554422569
17	Experiment 3_080320/NM IIA-KO/Snap-4404.czi	80	0.596349955338984	1	47.7079964271188	2016.83450643792	NM IIA-KO	80320	0.00498047775625	0.039666120221879
18	Experiment 3_080320/NM IIA-KO/Snap-4398.czi	25	0.340266240307	1	8.506656007675	1450.96258472831	NM IIA-KO	80320	0.00498047775625	0.017229941187409
19	Experiment 3_080320/NM IIA-KO/Snap-4405.czi	40	0.459075537182344	1	18.3630214872937	2021.71039416129	NM IIA-KO	80320	0.00498047775625	0.019785227456672
25	Experiment 2_040320/NM IIA-KO/Snap-4425.czi	3	0.27890675435	1	0.83672026305	2130.78783750092	NM IIA-KO	40320	0.00498047775625	0.001407929943658
26	Experiment 2_040320/NM IIA-KO/Snap-4428.czi	0		1	0	1906.93030379076	NM IIA-KO	40320	0.00498047775625	0
27	Experiment 2_040320/NM IIA-KO/Snap-4429.czi	1	0.27890675435	1	0.27890675435	2303.3713527105	NM IIA-KO	40320	0.00498047775625	0.000434146234746
31	Experiment 2_040320/NM IIA-KO/Snap-4437.czi	0		1	0	2020.7989667319	NM IIA-KO	40320	0.00498047775625	0
32	Experiment 2_040320/NM IIA-KO/Snap-4441.czi	29	0.356533511102586	1	10.339471821975	2160.19257817383	NM IIA-KO	40320	0.00498047775625	0.013424729023241
34	Experiment 2_040320/NM IIA-KO/Snap-4430.czi	5	0.354610016245	1	1.773050081225	2231.60764872069	NM IIA-KO	40320	0.00498047775625	0.002240537221167
37	Experiment 2_040320/NM IIA-KO/Snap-4438.czi	0		1	0	2009.54806748053	NM IIA-KO	40320	0.00498047775625	0
40	Experiment 1_270220/NM IIA-KO/Experiment-1653-Orthogonal Projection-25.czi	9	0.330925077581944	1	2.9783256982375	1683.90949034364	NM IIA-KO	270220	0.00498047775625	0.005344705313207
41	Experiment 1_270220/NM IIA-KO/Experiment-1654-Orthogonal Projection-26.czi	12	0.341162726303125	1	4.0939527156375	2638.33836468485	NM IIA-KO	270220	0.00498047775625	0.004548317289634
44	Experiment 1_270220/NM IIA-KO/Snap-4391.czi	2	0.455713714696875	1	0.91142742939375	1261.59485948018	NM IIA-KO	270220	0.00498047775625	0.00158529498196
46	Experiment 1_270220/NM IIA-KO/Snap-4387.czi	12	0.447412918436458	1	5.3689550212375	1399.17059654107	NM IIA-KO	270220	0.00498047775625	0.008576509561926
47	Experiment 1_270220/NM IIA-KO/Snap-4381.czi	5	0.28189504100375	1	1.40947520501875	2163.09121622796	NM IIA-KO	270220	0.00498047775625	0.00231150677442
50	Experiment 1_270220/NM IIA-KO/Snap-4386.czi	11	0.376252455949432	1	4.13877701544375	1384.68736722589	NM IIA-KO	270220	0.00498047775625	0.007944031454579
51	Experiment 1_270220/NM IIA-KO/Snap-4394.czi	2	0.2490238878125	1	0.498047775625	1923.33599751984	NM IIA-KO	270220	0.00498047775625	0.001039859911414
54	Experiment 1_270220/NM IIA-KO/Experiment-1651-Orthogonal Projection-23.czi	6	0.300488824627083	1	1.8029329477625	3327.41734512857	NM IIA-KO	270220	0.00498047775625	0.001803200313536
55	Experiment 1_270220/NM IIA-KO/Snap-4392.czi	37	0.475299106954561	1	17.5860669573187	3114.17320951697	NM IIA-KO	270220	0.00498047775625	0.011881163156541
56	Experiment 1_270220/NM IIA-KO/Experiment-1656-Orthogonal Projection-28.czi	6	0.346973283685417	1	2.0818397021125	2506.75414236472	NM IIA-KO	270220	0.00498047775625	0.002393533493612
58	Experiment 1_270220/NM IIA-KO/Snap-4389.czi	21	0.479548858244643	1	10.0705260231375	1898.73243740397	NM IIA-KO	270220	0.00498047775625	0.011060010134294
62	Experiment 3_080320/NM IIB-KO/Snap-4393.czi	142	0.622384350596171	1	88.3785777846562	2083.32886496162	NM IIB-KO	80320	0.00498047775625	0.068160146191137
67	Experiment 3_080320/NM IIB-KO/Snap-4387.czi	162	0.554247240677006	1	89.788052989675	2352.10532755541	NM IIB-KO	80320	0.00498047775625	0.068874466675508
71	Experiment 3_080320/NM IIB-KO/Snap-4394.czi	168	0.510291450109115	1	85.7289636183313	2325.94287790182	NM IIB-KO	80320	0.00498047775625	0.072228772940266
72	Experiment 3_080320/NM IIB-KO/Snap-4379.czi	134	0.563611676834142	1	75.523964695775	2011.14680084029	NM IIB-KO	80320	0.00498047775625	0.06662865184382
74	Experiment 3_080320/NM IIB-KO/Snap-4375.czi	226	0.477993639526825	1	108.026562533062	3306.41467043047	NM IIB-KO	80320	0.00498047775625	0.068351983198338
75	Experiment 3_080320/NM IIB-KO/Snap-4377.czi	133	0.457043090338581	1	60.7867310150313	2503.60648042277	NM IIB-KO	80320	0.00498047775625	0.053123364650159
78	Experiment 3_080320/NM IIB-KO/Snap-4389.czi	113	0.513738484308407	1	58.05244872685	1895.6893654949	NM IIB-KO	80320	0.00498047775625	0.059608922251088
79	Experiment 3_080320/NM IIB-KO/Snap-4383.czi	118	0.490872511060911	1	57.9229563051875	2547.96759579769	NM IIB-KO	80320	0.00498047775625	0.046311420990838
82	Experiment 2_040320/NM IIB-KO/Snap-4442.czi	97	0.506468377192268	1	49.12743258765	1974.63491840922	NM IIB-KO	40320	0.00498047775625	0.049123004508673
83	Experiment 2_040320/NM IIB-KO/Snap-4457.czi	104	0.699326121870373	1	72.7299166745187	1724.93866609962	NM IIB-KO	40320	0.00498047775625	0.060291998807796
84	Experiment 2_040320/NM IIB-KO/Snap-4456.czi	140	0.551410037299107	1	77.197405221875	2654.88849226887	NM IIB-KO	40320	0.00498047775625	0.052732911535714
85	Experiment 2_040320/NM IIB-KO/Snap-4447.czi	106	0.678049759438149	1	71.8732745004437	1694.44818127586	NM IIB-KO	40320	0.00498047775625	0.062557239089003
88	Experiment 2_040320/NM IIB-KO/Snap-4458.czi	64	0.540148376658301	1	34.5694961061312	1401.32714340952	NM IIB-KO	40320	0.00498047775625	0.045670991460483
89	Experiment 2_040320/NM IIB-KO/Snap-4461.czi	35	0.373251232989821	1	13.0637931546437	1905.16721466504	NM IIB-KO	40320	0.00498047775625	0.018371090857846
92	Experiment 2_040320/NM IIB-KO/Snap-4448.czi	95	0.560329960618947	1	53.2313462588	1586.52620877568	NM IIB-KO	40320	0.00498047775625	0.059879250323454
93	Experiment 2_040320/NM IIB-KO/Snap-4460.czi	89	0.473872872358708	1	42.174685639925	1694.30374742093	NM IIB-KO	40320	0.00498047775625	0.052528951869153
94	Experiment 2_040320/NM IIB-KO/Snap-4452.czi	119	0.611552445162395	1	72.774740974325	2230.36252928163	NM IIB-KO	40320	0.00498047775625	0.053354554893069
95	Experiment 2_040320/NM IIB-KO/Snap-4331.czi	98	0.571992623944834	1	56.0552771465938	1753.47182316518	NM IIB-KO	40320	0.00498047775625	0.055889121630196
96	Experiment 2_040320/NM IIB-KO/Snap-4453.czi	74	0.430474807148311	1	31.855135728975	1298.80898927487	NM IIB-KO	40320	0.00498047775625	0.056975275510924
97	Experiment 2_040320/NM IIB-KO/Snap-4451.czi	144	0.579395578977083	1	83.4329633727	2655.62560297679	NM IIB-KO	40320	0.00498047775625	0.05422451110525
103	Experiment 1_270220/NM IIB-KO/Snap-4349.czi	154	0.485176151293912	1	74.7171272992625	2069.99114553038	NM IIB-KO	270220	0.00498047775625	0.074396453498134
106	Experiment 1_270220/NM IIB-KO/Snap-4353.czi	149	0.579373294960277	1	86.3266209490812	1872.76422638288	NM IIB-KO	270220	0.00498047775625	0.079561536845342
112	Experiment 1_270220/NM IIB-KO/Snap-4334.czi	110	0.556681581937216	1	61.2349740130937	1722.08983282305	NM IIB-KO	270220	0.00498047775625	0.063875877961416
123	Experiment 3_080320/WT/Snap-4373.czi	126	0.767586488481101	1	96.7158975486187	2435.82715863797	WT	80320	0.00498047775625	0.051727808171108
125	Experiment 3_080320/WT/Snap-4353.czi	100	0.951321056221312	1	95.1321056221313	2046.7771387085	WT	80320	0.00498047775625	0.048857297704185
128	Experiment 3_080320/WT/Snap-4360.czi	119	0.628502810635347	1	74.7918344656062	1906.61653369211	WT	80320	0.00498047775625	0.062414228502236
131	Experiment 3_080320/WT/Snap-4358.czi	120	0.686641866661667	1	82.3970239994	2589.6890579618	WT	80320	0.00498047775625	0.046337609386374
132	Experiment 3_080320/WT/Snap-4368.czi	64	1.00325498802461	1	64.208319233575	1814.35318325758	WT	80320	0.00498047775625	0.035274278784625
134	Experiment 3_080320/WT/Snap-4371.czi	116	0.73290306292403	1	85.0167552991875	1903.69299324919	WT	80320	0.00498047775625	0.06093419496282
138	Experiment 3_080320/WT/Snap-4367.czi	116	0.975830159000431	1	113.19629844405	2333.37375071415	WT	80320	0.00498047775625	0.049713424591537
140	Experiment 2_040320/WT/Snap-4415.czi	90	0.934724997564653	1	84.1252497808187	1784.07187849958	WT	40320	0.00498047775625	0.050446397975675
141	Experiment 2_040320/WT/Snap-4401.czi	98	1.32902524289483	1	130.244473803694	1439.96568984251	WT	40320	0.00498047775625	0.068057177119768
142	Experiment 2_040320/WT/Snap-4421.czi	129	1.39225587882272	1	179.601008368131	2128.94506073111	WT	40320	0.00498047775625	0.060593390773409
143	Experiment 2_040320/WT/Snap-4408.czi	133	0.950746990627303	1	126.449349753431	1455.80858958514	WT	40320	0.00498047775625	0.091358164082478
144	Experiment 2_040320/WT/Snap-4419.czi	243	1.1587501663677	1	281.57629042735	2392.16331014892	WT	40320	0.00498047775625	0.101581693427474
145	Experiment 2_040320/WT/Snap-4409.czi	188	1.01734205742294	1	191.260306795513	2320.37470377034	WT	40320	0.00498047775625	0.081021396972878
146	Experiment 2_040320/WT/Snap-4416.czi	159	0.8833613409057	1	140.454453204006	2354.33160111245	WT	40320	0.00498047775625	0.067535091456476
150	Experiment 2_040320/WT/Snap-4423.czi	126	1.16922644468155	1	147.322532029875	1801.00052239308	WT	40320	0.00498047775625	0.069961112411327
151	Experiment 2_040320/WT/Snap-4410.czi	91	1.37264156183242	1	124.91038212675	1658.94733582931	WT	40320	0.00498047775625	0.054854061991371
153	Experiment 2_040320/WT/Snap-4414.czi	82	1.01449902393468	1	83.1889199626438	2251.19088725827	WT	40320	0.00498047775625	0.036425165215495
155	Experiment 2_040320/WT/Snap-4413.czi	170	0.835841355210662	1	142.093030385813	2688.27263466901	WT	40320	0.00498047775625	0.063237633641623
157	Experiment 2_040320/WT/Snap-4399.czi	109	1.45489350675923	1	158.583392236756	1942.44609067058	WT	40320	0.00498047775625	0.056114813442452
158	Experiment 2_040320/WT/Snap-4400.czi	145	1.31251045532293	1	190.314016021825	2026.42690659646	WT	40320	0.00498047775625	0.071554517721806
159	Experiment 2_040320/WT/Snap-4405.czi	130	0.928399365132356	1	120.691917467206	2058.69044150145	WT	40320	0.00498047775625	0.063146939131455
163	Experiment 1_270220/WT/Experiment-1635-Orthogonal Projection-04.czi	217	0.648219508155616	1	140.663633269769	2810.38398829675	WT	270220	0.00498047775625	0.077213647993887
165	Experiment 1_270220/WT/Snap-4376.czi	108	0.521705044967187	1	56.3441448564562	2115.3882002786	WT	270220	0.00498047775625	0.05105445893372
166	Experiment 1_270220/WT/Experiment-1634-Orthogonal Projection-03.czi	128	0.653376425648047	1	83.63218248295	2646.27724622831	WT	270220	0.00498047775625	0.048369837356398
169	Experiment 1_270220/WT/Experiment-1648-Orthogonal Projection-19.czi	81	0.675930765116744	1	54.7503919744563	2786.86119185398	WT	270220	0.00498047775625	0.029064956746595
170	Experiment 1_270220/WT/Experiment-1636-Orthogonal Projection-05.czi	63	0.417095248285318	1	26.277000641975	2125.60814063443	WT	270220	0.00498047775625	0.029638576742182
171	Experiment 1_270220/WT/Snap-4378.czi	128	0.519487175966357	1	66.4943585236937	2004.56758972428	WT	270220	0.00498047775625	0.06385417017423
173	Experiment 1_270220/WT/Experiment-1649-Orthogonal Projection-21.czi	29	0.400327367235129	1	11.6094936498188	2460.85405936312	WT	270220	0.00498047775625	0.011784526550715
174	Experiment 1_270220/WT/Snap-4375.czi	113	0.496240699624945	1	56.0751990576187	2059.26817692117	WT	270220	0.00498047775625	0.054873863087103
175	Experiment 1_270220/WT/Snap-4377.czi	92	0.550992419599049	1	50.6913026031125	1771.68543031979	WT	270220	0.00498047775625	0.051927954266348
179	Experiment 1_270220/WT/Experiment-1642-Orthogonal Projection-11.czi	171	0.643530152189145	1	110.043656024344	2930.69240897672	WT	270220	0.00498047775625	0.058347986119671
180	Experiment 4_unknowndate/NM IIB-KO/Image46.tif	255	0.6331884938352	1	161.463065927976	1905.61840020179	NM IIB-KO	unknowndate	0.019462761081	0.133814828809901
181	Experiment 4_unknowndate/NM IIB-KO/KO1.tif	124	0.736602723815589	1	91.338737753133	1489.75758418406	NM IIB-KO	unknowndate	0.019462761081	0.083235018446249
182	Experiment 4_unknowndate/NM IIB-KO/Image48.tif	280	0.552811924561403	1	154.787338877193	1992.09144768467	NM IIB-KO	unknowndate	0.019462761081	0.140555796434663
184	Experiment 4_unknowndate/NM IIB-KO/KO4.tif	141	0.649862972832255	1	91.630679169348	2780.17756937653	NM IIB-KO	unknowndate	0.019462761081	0.050716185021096
185	Experiment 4_unknowndate/NM IIB-KO/Image49.tif	217	0.565855113640686	1	122.790559660029	1651.08441078447	NM IIB-KO	unknowndate	0.019462761081	0.131428774072731
186	Experiment 4_unknowndate/NM IIB-KO/KO5.tif	105	0.614837890530257	1	64.557978505677	2597.9672001362	NM IIB-KO	unknowndate	0.019462761081	0.040416214644471
187	Experiment 4_unknowndate/NM IIB-KO/Image50.tif	394	0.734743929743132	1	289.489108318794	2930.25492007212	NM IIB-KO	unknowndate	0.019462761081	0.134459291340531
188	Experiment 4_unknowndate/NM IIB-KO/Image44.tif	221	0.565300739271217	1	124.931463378939	1840.90471960747	NM IIB-KO	unknowndate	0.019462761081	0.120049667778093
190	Experiment 4_unknowndate/NM IIB-KO/KO3.tif	151	0.810733557612516	1	122.42076719949	2291.52602691586	NM IIB-KO	unknowndate	0.019462761081	0.065894953068995
191	Experiment 4_unknowndate/NM IIB-KO/KO2.tif	159	0.654634253215019	1	104.086846261188	2170.72066888609	NM IIB-KO	unknowndate	0.019462761081	0.073247563483878
192	Experiment 3_080320/NM IIC-KO/Snap-4421.czi	140	0.778235224255178	1	108.952931395725	1788.00147544926	NM IIC-KO	80320	0.00498047775625	0.078299711673797
193	Experiment 3_080320/NM IIC-KO/Snap-4422.czi	100	0.9893221015015	1	98.93221015015	1517.03858312048	NM IIC-KO	80320	0.00498047775625	0.065917901569982
195	Experiment 3_080320/NM IIC-KO/Snap-4424.czi	64	1.3193596856166	1	84.4390198794625	1397.70633608073	NM IIC-KO	80320	0.00498047775625	0.045789303767099
196	Experiment 3_080320/NM IIC-KO/Snap-4426.czi	40	2.16576075230531	1	86.6304300922125	1601.51744682199	NM IIC-KO	80320	0.00498047775625	0.024976312358866
197	Experiment 3_080320/NM IIC-KO/Snap-4432.czi	62	1.3954174049003	1	86.5158791038187	1345.82469929388	NM IIC-KO	80320	0.00498047775625	0.046068407001692
198	Experiment 3_080320/NM IIC-KO/Snap-4425.czi	112	0.747560817502846	1	83.7268115603188	1723.92762911511	NM IIC-KO	80320	0.00498047775625	0.064967924469944
199	Experiment 3_080320/NM IIC-KO/Snap-4428.czi	74	1.37999616100203	1	102.11971591415	1602.66793718369	NM IIC-KO	80320	0.00498047775625	0.046173008321386
200	Experiment 3_080320/NM IIC-KO/Snap-4429.czi	32	2.19825836966484	1	70.344267829275	928.764472463256	NM IIC-KO	80320	0.00498047775625	0.034454375623488
201	Experiment 3_080320/NM IIC-KO/Snap-4423.czi	156	0.930998152884655	1	145.235711850006	2108.18642944306	NM IIC-KO	80320	0.00498047775625	0.073997250822458
203	Experiment 3_080320/NM IIC-KO/Snap-4433.czi	88	0.922293926316477	1	81.16186551585	1433.08765006113	NM IIC-KO	80320	0.00498047775625	0.061405874229847
204	Experiment 3_080320/NM IIC-KO/Snap-4427.czi	81	1.2569250159662	1	101.810926293263	1697.04301018687	NM IIC-KO	80320	0.00498047775625	0.047730080801594
205	Experiment 3_080320/NM IIC-KO/Snap-4430.czi	158	0.90736108995985	1	143.363052213656	1780.16718393868	NM IIC-KO	80320	0.00498047775625	0.088755708691596
206	Experiment 3_080320/NM IIC-KO/Experiment-1632-Orthogonal Projection-01.czi	151	0.812015774047144	1	122.614381881119	2665.88040667691	NM IIC-KO	80320	0.00498047775625	0.056641700663619
207	Experiment 3_080320/NM IIC-KO/Snap-4431.czi	55	1.43809031358193	1	79.0949672470063	1289.46561300415	NM IIC-KO	80320	0.00498047775625	0.042653328204591
208	Experiment 2_040320/NM IIC-KO/Snap-4341.czi	194	1.23210344822529	1	239.028068955706	2990.0397819202	NM IIC-KO	40320	0.00498047775625	0.064882079888387
209	Experiment 2_040320/NM IIC-KO/Snap-4343.czi	177	1.10521584920897	1	195.623205309988	1434.52202765493	NM IIC-KO	40320	0.00498047775625	0.12338604537802
210	Experiment 2_040320/NM IIC-KO/Snap-4349.czi	169	1.18921431300566	1	200.977218897956	2375.8871088415	NM IIC-KO	40320	0.00498047775625	0.071131325798727
211	Experiment 2_040320/NM IIC-KO/Snap-4351.czi	245	1.10763792450936	1	271.371291504794	2090.67506965209	NM IIC-KO	40320	0.00498047775625	0.117187028991918
212	Experiment 2_040320/NM IIC-KO/Snap-4340.czi	239	1.13754945505513	1	271.874319758175	1936.79822889499	NM IIC-KO	40320	0.00498047775625	0.123399534569152
213	Experiment 2_040320/NM IIC-KO/Snap-4345.czi	160	0.918524610196406	1	146.963937631425	1244.18310924433	NM IIC-KO	40320	0.00498047775625	0.12859843443557
214	Experiment 2_040320/NM IIC-KO/Snap-4348.czi	296	1.31917039380999	1	390.474436567756	2201.55046546172	NM IIC-KO	40320	0.00498047775625	0.134450699470076
215	Experiment 2_040320/NM IIC-KO/Snap-4342.czi	250	1.04054133474678	1	260.135333686694	2694.08983268831	NM IIC-KO	40320	0.00498047775625	0.092795717858649
216	Experiment 2_040320/NM IIC-KO/Snap-4337.czi	155	1.35388664683609	1	209.852430259594	2095.34675778745	NM IIC-KO	40320	0.00498047775625	0.073973436341234
217	Experiment 2_040320/NM IIC-KO/Snap-4332.czi	147	0.532402907902806	1	78.2632274617125	1965.91410185802	NM IIC-KO	40320	0.00498047775625	0.074774375879937
218	Experiment 2_040320/NM IIC-KO/Snap-4334.czi	149	0.42086708341573	1	62.7091954289437	2579.11550368528	NM IIC-KO	40320	0.00498047775625	0.057771743757538
219	Experiment 2_040320/NM IIC-KO/Snap-4344.czi	270	1.14691179619481	1	309.6661849726	1838.64297327481	NM IIC-KO	40320	0.00498047775625	0.146847432549182
220	Experiment 2_040320/NM IIC-KO/Snap-4336.czi	174	0.768710980585345	1	133.75571062185	2211.95468349453	NM IIC-KO	40320	0.00498047775625	0.078663456036589
221	Experiment 2_040320/NM IIC-KO/Snap-4350.czi	129	1.60309610383731	1	206.799397395012	2255.85759491587	NM IIC-KO	40320	0.00498047775625	0.057184460708306
222	Experiment 2_040320/NM IIC-KO/Snap-4339.czi	260	1.15575817470517	1	300.497125423344	1739.86017745735	NM IIC-KO	40320	0.00498047775625	0.14943729580613
223	Experiment 2_040320/NM IIC-KO/Snap-4346.czi	159	1.08066970182783	1	171.826482590625	2155.19217850655	NM IIC-KO	40320	0.00498047775625	0.073775323419269
224	Experiment 2_040320/NM IIC-KO/Snap-4347.czi	254	1.10776413716277	1	281.372090839344	1798.4704396929	NM IIC-KO	40320	0.00498047775625	0.14123112306665
225	Experiment 2_040320/NM IIC-KO/Snap-4352.czi	273	1.07311964314336	1	292.961662578137	2056.17031975679	NM IIC-KO	40320	0.00498047775625	0.132771102362907
226	Experiment 2_040320/NM IIC-KO/Snap-4333.czi	105	0.615729350036964	1	64.6515817538812	2054.78574694055	NM IIC-KO	40320	0.00498047775625	0.051100218188849
227	Experiment 2_040320/NM IIC-KO/Snap-4338.czi	239	1.14215483406823	1	272.975005342306	2003.61133799508	NM IIC-KO	40320	0.00498047775625	0.119284611475176
228	Experiment 1_270220/NM IIC-KO/Snap-4363.czi	172	0.671235202718786	1	115.452454867631	1794.60060847629	NM IIC-KO	270220	0.00498047775625	0.095843052313482
230	Experiment 1_270220/NM IIC-KO/Snap-4359.czi	217	0.556206902972177	1	120.696897944963	2227.55353982711	NM IIC-KO	270220	0.00498047775625	0.097416289269906
232	Experiment 1_270220/NM IIC-KO/Snap-4357.czi	104	0.660056970330709	1	68.6459249143937	2008.70636673972	NM IIC-KO	270220	0.00498047775625	0.05177461560437
233	Experiment 1_270220/NM IIC-KO/Snap-4369.czi	103	0.730873022191444	1	75.2799212857187	1635.07092546585	NM IIC-KO	270220	0.00498047775625	0.062994209239366
234	Experiment 1_270220/NM IIC-KO/Snap-4355.czi	171	0.524814202864729	1	89.7432286898687	2014.68294004722	NM IIC-KO	270220	0.00498047775625	0.084876878937582
235	Experiment 1_270220/NM IIC-KO/Snap-4360.czi	93	0.51796968665	1	48.17118085845	1911.82113294739	NM IIC-KO	270220	0.00498047775625	0.048644718063465
236	Experiment 1_270220/NM IIC-KO/Snap-4362.czi	194	0.580482384260664	1	112.613582546569	2414.98883970582	NM IIC-KO	270220	0.00498047775625	0.080331634171706
237	Experiment 1_270220/NM IIC-KO/Snap-4370.czi	156	0.494567826423518	1	77.1525809220688	2387.78547020118	NM IIC-KO	270220	0.00498047775625	0.065332502415662
238	Experiment 1_270220/NM IIC-KO/Snap-4358.czi	162	0.70550619475571	1	114.292003550425	2358.20143232906	NM IIC-KO	270220	0.00498047775625	0.068696421679298
239	Experiment 1_270220/NM IIC-KO/Snap-4368.czi	164	0.552863399710556	1	90.6695975525313	1778.02557850349	NM IIC-KO	270220	0.00498047775625	0.092237143257542
240	Experiment 1_270220/NM IIC-KO/Snap-4366.czi	92	0.512231310104755	1	47.1252805296375	1391.79450898406	NM IIC-KO	270220	0.00498047775625	0.06610171214654
241	Experiment 1_270220/NM IIC-KO/Snap-4371.czi	96	0.504273372820312	1	48.41024379075	1746.52405669521	NM IIC-KO	270220	0.00498047775625	0.054966319892354
242	Experiment 1_270220/NM IIC-KO/Snap-4365.czi	98	0.568536782236416	1	55.7166046591687	1760.10581953651	NM IIC-KO	270220	0.00498047775625	0.055678470528441
243	Experiment 1_270220/NM IIC-KO/Snap-4356.czi	116	0.629257603410345	1	72.9938819956	2056.79287947632	NM IIC-KO	270220	0.00498047775625	0.056398483851974
245	Experiment 1_270220/NM IIC-KO/Snap-4367.czi	160	0.965527869021016	1	154.484459043363	2623.73062342577	NM IIC-KO	270220	0.00498047775625	0.060981870078983
246	Experiment 1_270220/NM IIC-KO/Snap-4354.czi	122	0.569284936974641	1	69.4527623109063	2031.23306763124	NM IIC-KO	270220	0.00498047775625	0.060062039134816
247	Experiment 2/NMIIA-KO_NMIIB-GFP_Pax-Cy3_Pha_DAPI_15-04-21_1.tif	40	0.252716725538856	1	10.1086690215542	2318.16214412484	NMIIA-KO_NMIIB-GFP	Experiment 2	0.00124598410225	0.017255048401759
248	Experiment 2/NMIIA-KO_NMIIB-GFP_Pax-Cy3_Pha_DAPI_15-04-21_10.tif	87	0.423348161638046	1	36.83129006251	2484.98072565458	NMIIA-KO_NMIIB-GFP	Experiment 2	0.00124598410225	0.035010331911964
249	Experiment 2/NMIIA-KO_NMIIB-GFP_Pax-Cy3_Pha_DAPI_15-04-21_6.tif	47	0.255400230661202	1	12.0038108410765	1991.9136667917	NMIIA-KO_NMIIB-GFP	Experiment 2	0.00124598410225	0.023595400133833
250	Experiment 2/NMIIA-KO_NMIIB-GFP_Pax-Cy3_Pha_DAPI_15-04-21_9.tif	77	0.254277846529305	1	19.5793941827565	2797.41497724608	NMIIA-KO_NMIIB-GFP	Experiment 2	0.00124598410225	0.027525412077333
251	Experiment 2/NMIIA-KO_NMIIB-GFP_Pax-Cy3_Pha_DAPI_15-04-21_7.tif	82	0.405355096289308	1	33.2391178957232	2808.96151192163	NMIIA-KO_NMIIB-GFP	Experiment 2	0.00124598410225	0.029192283216406
252	Experiment 2/NMIIA-KO_NMIIB-GFP_Pax-Cy3_Pha_DAPI_15-04-21_3.tif	36	0.177691177248653	1	6.3968823809515	2770.42696159134	NMIIA-KO_NMIIB-GFP	Experiment 2	0.00124598410225	0.012994386966015
253	Experiment 2/NMIIA-KO_NMIIB-GFP_Pax-Cy3_Pha_DAPI_15-04-21_5.tif	90	0.554033753199364	1	49.8630377879428	2913.8285179034	NMIIA-KO_NMIIB-GFP	Experiment 2	0.00124598410225	0.03088719855922
254	Experiment 2/NMIIA-KO_NMIIB-GFP_Pax-Cy3_Pha_DAPI_15-04-21_2.tif	76	0.382664670139701	1	29.0825149306172	2935.47998364819	NMIIA-KO_NMIIB-GFP	Experiment 2	0.00124598410225	0.025890144175178
255	Experiment 2/NMIIA-KO_NMIIB-GFP_Pax-Cy3_Pha_DAPI_15-04-21_8.tif	42	0.664880849991119	1	27.924995699627	3446.6686352942	NMIIA-KO_NMIIB-GFP	Experiment 2	0.00124598410225	0.012185679693695
256	Experiment 2/NMIIA-KO_NMIIB-GFP_Pax-Cy3_Pha_DAPI_15-04-21_4.tif	28	0.305355103915696	1	8.5499429096395	3281.69286425169	NMIIA-KO_NMIIB-GFP	Experiment 2	0.00124598410225	0.008532181760521
257	Experiment 2/NMIIA-KO_NMIIB-GFP_Pax-Cy3_Pha_DAPI_15-04-21_14.tif	102	0.342376886449637	1	34.922442417863	2861.61929205092	NMIIA-KO_NMIIB-GFP	Experiment 2	0.00124598410225	0.035644154441976
258	Experiment 2/NMIIA-KO_NMIIB-GFP_Pax-Cy3_Pha_DAPI_15-04-21_11.tif	195	0.331521226467379	1	64.646639161139	2983.13887555926	NMIIA-KO_NMIIB-GFP	Experiment 2	0.00124598410225	0.065367389228047
259	Experiment 3/NMIIA-KO_NMIIB-GFP_Pax-Cy3_Pha_DAPI_22-04-21_1b.tif	67	0.245254303589149	1	16.432038340473	2989.0872036634	NMIIA-KO_NMIIB-GFP	Experiment 3	0.00124598410225	0.022414869635749
260	Experiment 3/NMIIA-KO_NMIIB-GFP_Pax-Cy3_Pha_DAPI_22-04-21_1.tif	64	0.314961418846883	1	20.1575308062005	2706.77087979149	NMIIA-KO_NMIIB-GFP	Experiment 3	0.00124598410225	0.02364440983085
261	Experiment 3/NMIIA-KO_NMIIB-GFP_Pax-Cy3_Pha_DAPI_22-04-21_3.tif	43	0.285562170411017	1	12.2791733276737	3021.37937364141	NMIIA-KO_NMIIB-GFP	Experiment 3	0.00124598410225	0.014231910224559
262	Experiment 3/NMIIA-KO_NMIIB-GFP_Pax-Cy3_Pha_DAPI_22-04-21_2.tif	45	0.374598198207561	1	16.8569189193403	3465.9975866724	NMIIA-KO_NMIIB-GFP	Experiment 3	0.00124598410225	0.012983275052769
263	Experiment 3/NMIIA-KO_NMIIB-GFP_Pax-Cy3_Pha_DAPI_22-04-21_4.tif	27	0.544771938039305	1	14.7088423270612	3386.90126987747	NMIIA-KO_NMIIB-GFP	Experiment 3	0.00124598410225	0.007971888711411
264	Experiment 3/NMIIA-KO_NMIIB-GFP_Pax-Cy3_Pha_DAPI_22-04-21_5.tif	25	0.49550295778278	1	12.3875739445695	3515.00089542979	NMIIA-KO_NMIIB-GFP	Experiment 3	0.00124598410225	0.007112373721584
265	Experiment 3/NMIIA-KO_NMIIB-GFP_Pax-Cy3_Pha_DAPI_22-04-21_6.tif	35	0.392057797659407	1	13.7220229180792	3093.17920753357	NMIIA-KO_NMIIB-GFP	Experiment 3	0.00124598410225	0.011315218954904
266	Experiment 1/Snap-8434-Airyscan Processing-22.tif	195	0.534201307100046	1	104.169254884509	4228.66196369142	NMIIA-KO_NMIIB-GFP	Experiment 1	0.00124598410225	0.046113877551417
267	Experiment 1/Snap-8429-Airyscan Processing-19b.tif	99	0.377759725545795	1	37.3982128290337	5130.27225787285	NMIIA-KO_NMIIB-GFP	Experiment 1	0.00124598410225	0.019297221477491
268	Experiment 1/Snap-8439-Airyscan Processing-27.tif	66	0.565016033276367	1	37.2910581962402	5023.23599356907	NMIIA-KO_NMIIB-GFP	Experiment 1	0.00124598410225	0.013138940731532
269	Experiment 1/Snap-8432-Airyscan Processing-21b.tif	58	0.429005215895388	1	24.8823025219325	5310.4378211059	NMIIA-KO_NMIIB-GFP	Experiment 1	0.00124598410225	0.010921886660547
270	Experiment 1/Snap-8428-Airyscan Processing-18.tif	90	0.815690414671864	1	73.4121373204677	4736.37058173985	NMIIA-KO_NMIIB-GFP	Experiment 1	0.00124598410225	0.019001891521533
271	Experiment 1/Snap-8431-Airyscan Processing-20b.tif	56	0.624260284943362	1	34.9585759568282	4703.60493780298	NMIIA-KO_NMIIB-GFP	Experiment 1	0.00124598410225	0.011905761801959
272	Experiment 1/Snap-8429-Airyscan Processing-19.tif	56	0.644396278024366	1	36.0861915693645	5263.46795840338	NMIIA-KO_NMIIB-GFP	Experiment 1	0.00124598410225	0.010639373212217
273	Experiment 1/Snap-8440-Airyscan Processing-28.tif	78	0.343092904463147	1	26.7612465481255	4213.17313531635	NMIIA-KO_NMIIB-GFP	Experiment 1	0.00124598410225	0.018513362137002
274	Experiment 1/Snap-8442-Airyscan Processing-30.tif	79	0.353212835061883	1	27.9038139698887	4337.50864289578	NMIIA-KO_NMIIB-GFP	Experiment 1	0.00124598410225	0.018213220192516
275	Experiment 1/Snap-8438-Airyscan Processing-26.tif	65	0.291349421078427	1	18.9377123700977	4012.00277208758	NMIIA-KO_NMIIB-GFP	Experiment 1	0.00124598410225	0.016201384618231
276	Experiment 1/Snap-8435-Airyscan Processing-23.tif	173	0.478659557430838	1	82.808103435535	4680.28883729757	NMIIA-KO_NMIIB-GFP	Experiment 1	0.00124598410225	0.036963530673866
277	Experiment 1/Snap-8431-Airyscan Processing-20.tif	56	0.577424632528428	1	32.335779421592	4607.9270645753	NMIIA-KO_NMIIB-GFP	Experiment 1	0.00124598410225	0.012152970134991
278	Experiment 1/Snap-8439-Airyscan Processing-27b.tif	72	0.422682801353559	1	30.4331616974562	5023.04660398552	NMIIA-KO_NMIIB-GFP	Experiment 1	0.00124598410225	0.014333930316886
279	Experiment 1/Snap-8432-Airyscan Processing-21.tif	51	0.371914038991211	1	18.9676159885517	5204.15039324756	NMIIA-KO_NMIIB-GFP	Experiment 1	0.00124598410225	0.009799870516074
280	Experiment 1/Snap-8436-Airyscan Processing-24b.tif	76	0.513886469539819	1	39.0553716850262	5039.73406906696	NMIIA-KO_NMIIB-GFP	Experiment 1	0.00124598410225	0.015080160770084
281	Experiment 1/Snap-8436-Airyscan Processing-24.tif	66	0.616894280442776	1	40.7150225092232	5135.39574450131	NMIIA-KO_NMIIB-GFP	Experiment 1	0.00124598410225	0.012851979337847
282	Experiment 1/Snap-8437-Airyscan Processing-25.tif	135	0.52798345595047	1	71.2777665533135	4722.44047947669	NMIIA-KO_NMIIB-GFP	Experiment 1	0.00124598410225	0.028586914030298

## Sheet: Tabelle1
Cell line	WT	NM IIA-KO	NM IIA-KO + NM IIB
	0.767586	0.530517	0.252717
	0.951321	0.713966	0.423348
	0.628503	0.551946	0.2554
	0.686642	0.375993	0.254278
	1.00325	0.431019	0.405355
	0.732903	0.416534	0.177691
	0.97583	0.59635	0.554034
	0.934725	0.340266	0.382665
	1.32903	0.459076	0.664881
	1.39226	0.278907	0.305355
	0.950747	0.278907	0.342377
	1.15875	0.356534	0.331521
	1.01734	0.35461	0.245254
	0.883361	0.330925	0.314961
	1.16923	0.341163	0.285562
	1.37264	0.455714	0.374598
	1.0145	0.447413	0.544772
	0.835841	0.281895	0.495503
	1.45489	0.376252	0.392058
	1.31251	0.249024	0.534201
	0.928399	0.300489	0.37776
	0.64822	0.475299	0.565016
	0.521705	0.346973	0.429005
	0.653376	0.479549	0.81569
	0.675931		0.62426
	0.417095		0.644396
	0.519487		0.343093
	0.400327		0.353213
	0.496241		0.291349
	0.550992		0.47866
	0.64353		0.577425
			0.422683
			0.371914
			0.513886
			0.616894
			0.527983
