# Supplementary material for: Distinct roles of nonmuscle myosin II isoforms for establishing tension and elasticity during cell morphodynamics
Source: eLife journal article supplement (doi:10.7554/elife.71888), 2021-08-10
Supplement: data1 [file Figure 2F_source data.xlsx]

## Sheet: Tabelle1
Young's Modulus	WT	NM IIA-KO	NM IIB-KO	NM IIC-KO
	Mean	Mean	Mean	Mean
	1403.09	1048.23	2468.33	2490.28
	1926.45	716.065	2123.38	2187.63
	1383.64	648.265	2957	3155.51
	1600.26	633.678	1856.42	753.971
	1471.04	742.204	1557.35	805.974
	564.409	1044.49	4906.48	1476.96
	1628.23	911.421	2443.34	1470.64
	1570.06	392.06	771.24	1055.01
	3966.6	616.05	1267.26	1288.45
	630.221	485.516	2378.91	394.309
	417.361	535.197	1578.72	5660.26
	861.322	891.08	3765.99	1236.07
	1009.98	370.003	2591.75	547.247
	1659.28	391.994	3109.72	2308.57
	2558.56	84.4344	5240.75	1541.81
	3489.98	137.711	2102.61	523.117
		693.816	1161.47	467.87
		436.806		940.331
		873.213		1686.66
				1155.23
				2871.17
				974.816
