# Supplementary material for: Distinct roles of nonmuscle myosin II isoforms for establishing tension and elasticity during cell morphodynamics
Source: eLife journal article supplement (doi:10.7554/elife.71888), 2021-08-10
Supplement: data1 [file Figure 3&4_source data.xlsx]

## Sheet: Figure 3
WT			NM IIA-KO			NM IIB-KO			NM IIC-KO
arc radius [µm]	spanning distance [µm]		arc radius [µm]	spanning distance [µm]		arc radius [µm]	spanning distance [µm]		arc radius [µm]	spanning distance [µm]
27.13	27.58		20.17	27.22		22.83	30.61		38.035	24.86
28.7	28.55		30.765	32.15		58	21.41		27.08	25.77
28.925	27.17		21.86	33.47		51.395	22.24		27.59	26.76
23.29	28.13		42.13	32.34		27.49	31.81		26.775	20.78
30.82	28.85		20.99	30.18		68.135	35.63		44.33	31.75
26.255	22.59		36.5	35.71		56.135	26.84		32.965	35.66
26.255	24.34		16.5	26.44		23.905	19.29		39.265	29.03
33.125	31.82		23.395	28.71		31.79	25.94		39.875	24.13
37.735	26.62		21.655	24.3		30.815	19.38		12.595	11.92
37.725	30.12		17.3	22.4		22.27	16.8		14.59	15.22
36.65	28.87		18.02	17.35		33.94	30.47		30.765	18.11
39.06	30.34		45.05	24.34		30.56	30.52		19.4	13.99
50.83	38.94		28.925	30.3		58.665	42.92		56.205	26.4
50.83	34.96		28.925	40.31		68.85	35.92		44.38	35.66
50.83	31.41		30.1	26.77		44.64	27.81		54.21	27.2
43.26	31.55		15.82	23.5		68.85	35.71		24.56	12.44
25.9	26.64		29.64	33		77.5	38.44		15.15	16.27
23.55	24.37		38.395	33.32		77.5	34.59		29.39	27.17
23.55	26.99		42.08	34.77		77.5	18.85		29.33	18.66
20.73	24.38		33.99	32.77		60	20.61		8.805	10.57
18.53	28.07		50.425	32.87		19.095	29.67		37.78	23.76
16.79	20.53		14.54	17.96		52.52	29.72		34.45	25.49
31.38	29.65		42.025	29.54		96	32.35		8.345	10.21
26.72	31.7		20.475	18.84		24.265	31.04		12.695	11.06
28.41	28.73		20.5	19.14		40.03	22.99		42.795	26.52
28.41	22.28		25.75	27		64.295	22.98		50.22	33.89
35.81	21.49		15.51	19.92		63.885	27.03		34.81	24.28
25.34	24.84		20.835	24.82		41.155	28.74		24.06	15.95
29.125	34.14		28.255	32.94		44.915	27.3		25.85	26.6
28.05	27.64		24.16	26.53		42.745	27.4		39.62	33.69
15.355	19.62		24.215	21.06		54.11	31.33		22.935	18.15
24.725	23.43		28.615	26.25		39.52	28.01		19.3	17.72
30.715	26.98		31.79	28.99		44.79	39.87		69.58	32.08
13.67	17.09		78.425	33.17		41.875	32.5		79.96	37.59
30.2	22.9		32.505	31.17		37.165	22.45		67.76	34.74
34.76	28.02		33.58	38.66		37.165	34.41		58.66	27.6
28.515	32.32		56.615	38.23		71	38.96		46.635	20.92
28.565	30.17		18.89	19.03		70	28.93		47.615	30.1
24.42	28.11		14.18	14.02		54	14.75		60.3	24.07
30.15	31.6		20.58	34.88		94	30.14		36.855	17.98
26.975	22.69		18.685	27.98		33.88	35.97		31.175	28.93
23.6	17.19		34.5	22.41		35.27	23.08		22.935	29.8
35.935	31.07		18.58	24.47		42.335	29.69		31.535	26.43
11.21	10.91		29.075	18.7		71.615	34.97		25.235	24.31
6.5	6		31.49	21		54.16	26.77		49.45	26.1
14.845	10.92		29.535	33.31		61.375	15.6		27.9	30.4
29.925	25.76		29	27.03		69.25	26.87		26.525	20.59
29.485	21.22		26.57	28.46		66	37.86		27.335	15.34
38.955	22.35		24.545	24.45		36.19	47.98		29.385	27.28
26.465	23.92		19.4	23.61		20.89	40.19		36.19	26.94
33.17	34.81		22.475	25.57		11.11	22.04		52.775	23.83
29.23	29.74		12.645	13.39		19.71	27.07		53.29	25.38
12.235	16.27		20.68	17.4		29.74	35.08		25.44	24.35
19.605	29.9		32.555	29.72		53.595	37.07		22.01	26.08
27.695	21.55		18.685	17.66		26.355	20.39		16.74	17.98
26.67	19.27		31.84	20.39		56.72	36.38		17.1	18.45
26.67	15.61		20.225	15		50.425	25.78		82.615	26.68
31.225	19.97		38.75	21.17		55.695	32.91		44.74	37.19
36.855	29.09		33.835	29.95		42.08	29.17		82.62	28.24
49.225	28.46		33.13	32.57		54.57	28.84		32.915	11.44
18.53	18.14		35.425	29.25		47.3	46.91		53.65	32.4
9.725	8.6		34.04	24.74		51.65	36.88		49.91	46.03
17.2	25.13		21.45	22.53		49.245	19.32		48.94	38.2
17.815	24.24		10.445	10.4		60	37.32		40.185	27.2
9.88	15.44		19.145	25.01		68.235	40.95		10.29	8.81
16.33	22.39		16.74	23.63		66.035	34.65		19.145	19.93
40.8	32.25		24.215	28.81		66	25.07		22.32	24.72
24.455	22.13		27.59	25.55		52.41	29		12.235	9.01
33.735	23.96		23.345	28.27		62.81	45.89		26.975	21.09
34.555	24.77		24.215	30.16		40.185	31.68		26.72	20.68
18.48	29.02		31.175	16.07		34.095	20.04		44.845	30.05
18.785	18.02		27.85	23.89		34.86	31.57		36.04	31.46
32.865	30.2		27.85	27.09		62.555	48.13		47.145	32.79
28.105	31.27		47.35	28.97		62.505	40.09		38.65	38.61
42.49	39.78		15.765	22.8		39.315	18.49		25.495	26.65
26.26	30		98.235	40.29		47.81	31.69		24.93	23.91
14.59	16.76		21.805	26.62		33.375	48.5		29.59	20.45
44.585	29.58		31.84	29.58		26.975	41.49		21.96	19.97
36.19	29.11		18.12	24.32		13.865	22.98		26.465	33.74
45.405	27.91		27.59	29.35		13.865	34.64		49.45	33.97
25.545	14.85		37.88	36.32		75.2	45.04		28.925	28.42
50.37	27.84		23.29	28.02		63.065	41.82		24.98	25.2
72.64	39.26		20.17	27.57		62.655	36.85		23.495	23.8
46.325	32.34		35.015	38.69		75.35	41.24		30.46	27.76
32.35	24.87		38.08	39.18		33.63	39.01		85.285	33.34
34.35	29.2		29.69	31.85		32.76	32.93		58.87	34.36
45.56	26.8		21.09	31		6.195	10.63		30.405	12.26
34.4	18.36		33.17	41.38		17.3	28.18		25.9	10.04
48.12	26.3		25.85	34.36		78.465	30.8		14.18	14.03
46.585	32.81		38.085	24.3		64.04	41.83		17.355	16.22
46.125	16.89		18.58	23.52		82.98	33.53		16.74	14.6
19.4	10.14		18.07	22.4		39.84	14.5		16.895	15.38
56.055	23.02		25.03	25.94		55.185	33.34		18.58	19.62
67.11	22.67		42.13	32.22		48.425	39.1		25.085	27.51
53.7	30.89		33.225	16.2		47.455	34.85		32.865	22.43
27.95	17.01		15.705	19.19		52.88	24.24		31.275	22.27
49.45	24.46		33.07	30.08		79.705	36.05		24.58	23.52
23.85	18.47		41.515	33.33		66.24	39.2		28.615	27.07
25.03	17.04		9.725	13.66		66.19	34.46		50.065	24.18
45.715	25.2		27.18	25.31		50.425	30.38		21.14	22.52
45.05	21.82		38.29	24.85		77.86	24.95		41.055	20.37
22.625	18.59		32.865	28.77		53.185	18.72		50.22	33.41
10.75	14.1		32.865	26.52		75.405	24.01		35.375	18.29
7.885	10.47		23.855	33.04		83.185	29.86		13.31	11.8
23.035	19.07		43.1	37.6		38.085	15.54		32.915	23.76
30.61	17.82		22.065	24.69		27.085	18.4		35.525	32.8
50.73	24.67		16.025	17.95		63.93	36.95		45.865	33.78
50.73	26.12		37.115	26.58		101.05	36.54		34.04	25.31
28.46	19.06		12.595	13.11		56.43	14.63		39.98	29.1
71.565	24.31		15.205	14.6		68.545	24.72		24.88	30.95
33.685	20.21		37.115	27.73		67.78	22.01		35.73	33.43
47.965	22.61		46.735	28.52		49.655	12.9		42.54	34.56
30.15	26.5		22.115	27.34		43.87	17.73		49.245	23.96
35.885	23.83		35.375	30.97		36.245	23.11		43.77	17.66
35.885	22.75		35.375	31.85		48.375	28.3		62.095	26.49
30.51	19.61		37.47	33.48		56.67	29.61		52.165	32.94
29.33	21.4		37.47	22.71		33.12	21.17		37.06	18.83
33.325	31		15.205	22.27		49.245	21.96		47.455	20.51
45.51	35.96		23.24	23.28		42.795	23.54		57.745	33.19
29.385	28.07		36.395	41.11		34.04	20.89		73.765	33.75
21.4	20.05		25.85	31.75		99.35	33.45		29.435	31.82
62.965	29		22.73	30.61		40.695	21.54		28.05	26.15
76.99	25.61		17.405	30.59		22.575	6.58		31.225	24.31
74.535	23.72		22.525	30.72		85.64	33.7		31.33	26.82
76.835	29.91		36.6	25.58		94.295	28.63		24.06	23.97
67.775	25.24		23.035	24.82		77.35	13.71		13.155	16.96
75.61	28.68		18.89	25.25		69.975	18.93		19.86	20.4
60.405	27.64		22.115	25.79		64.755	32.11		30.255	23.14
69.21	29.63		46.225	40.56		99.73	23.37		23.905	20.69
56.925	35.19		36.225	36.41		65.525	20.1		21.6	18.04
55.185	18.19		25.135	15.98		80.32	42.21		36.6	25.96
57.95	18.04		43.82	28		79.04	44.23		31.79	25.08
73.51	33.94		28.72	29.3		68.44	29.36		13.205	16.16
45.035	39.84		27.645	15.12		76.325	31.95		13.77	17.21
35.78	25.84		23.955	23.5		67.52	15.13		63.475	32.39
53.595	38.18		18.19	19.34		22.115	13.75		29.895	27.62
55.08	22.57		28.255	20.75		44.23	16.56		39.825	20.58
82.62	32.9		13.67	19.3		42.54	16.47		35.73	25
52.265	25.43		30.61	16.27		100	23.16		31.275	29.1
15.92	11.32		25.495	24.86		56.72	21.08		51.755	31.51
49.35	29.6		47.71	34.77		70.95	21.09		43.615	25.91
53.485	26.67		47.505	38.95		75.66	18.03		34.655	26.35
63.595	37.54		38.545	31.89		49.55	24.41		34.655	31.3
84.565	31.7		36.295	29.94		71.87	28.98		55.335	18.65
19.59	13.11		19.25	12.7		98.585	32.01		68.7	25.14
76.225	32.36		25.085	21.43		55.095	25.19		64.705	23.74
84.26	39.58		19.145	25.13		39.52	14.91		41.925	20.06
32.555	18.6		24.01	29.27		38.65	16.52		39.47	28.79
38.035	21.7		25.7	21.86		30.92	19.85		30.97	29.98
40.285	23.57		22.215	24.53		50.115	19.86		50.22	37.36
39.675	22.45		89.585	35.57		41.62	24.47		44.28	35.26
46.93	28.68		46.84	23.56		29.18	18.43		21.655	27.6
36.14	23.41		33.375	28.35		45.455	26.37		23.14	25.93
33.835	24.25		60.97	38.84		54.005	26.97		31.635	33.72
39.825	27.95		9.625	10.26		70.49	30.28		84.31	30.25
75.455	33.36		17.61	15.44		58.15	35.35		47.045	21.68
82.315	39.31		13.155	11.67		99.265	24.38		78.22	33.38
58.15	29.41		37.78	20.04		40.85	13.9		62.86	40.17
37.555	21.8		32.66	19.66		100	27.67		19.45	18.65
51.96	26.3		59.225	28.24		48.17	34.87		44.79	27.24
16.025	15.09		29.59	25.05		97.78	34.12		33.94	22.38
56.66	26.72		13.925	15.13		27.13	14.34		20.785	18.29
72.18	36.83		27.08	25.21		66.75	28.49		31.02	26.8
94.225	43.77		58.15	34.75		96.8	45.15		41.04	24.74
53.43	41.38		30.97	27.03		33.02	24.18		43	24.87
44.585	27.55		30.715	22.98		63.375	24.87		43.975	28.01
53.58	26.68		27.18	11.52		41.62	28.01		26.105	19.75
59.175	33.84		19.51	16.62		41.005	31.08		36.295	20.14
43.36	27		55.85	33.67		63.325	30.17		58.82	27.27
23.485	16.52		23.085	19.39		37.06	33.12		61.77	27.5
51.14	26.62		32.35	24.4		55.03	25.41		32.405	31.08
41.36	39.34		64.085	35.53		44.485	26.16		30.955	31.43
48.015	25		47.555	28.49		94.41	24.79		40.85	34.4
28.105	22.67		15.51	6.98		64.805	33.6		25.135	19.39
51.855	38.3		22.115	16.02		47.71	29.42		20.17	13.52
37.265	26.01		20.015	25.8		81.855	37.8		30.61	17.44
37.42	20.63		27.745	20.18		82.52	29.14		30.46	29.64
81.905	33.06		10.545	10.15		92.705	27		11.055	12.09
76.28	47.22		16.225	14.1		73.715	33.37		12.9	13.4
77.885	36.55		25.135	20.77		64.345	28.67		9.835	11.4
21.195	18.64		42.845	30.71		100	30.91		14.18	15.75
45.05	28.7		16.895	18.02		99.67	26.89		31.685	23.01
40.445	40.11		25.595	18.83		57.385	21.77		18.84	17.34
43.665	38.65		39.21	26.9		23.955	23.62		28.155	23.7
18.615	18.83		33.58	21.54		23.75	21.19		34.45	21.7
31.865	25.67		45.455	20.35		39.435	30.16		13	10.62
45.405	34.63		28.77	21.76		27.285	28.61		15.255	11.04
44.585	32.69		33.99	23.44		44.075	30.16		30.92	27.41
51.805	29.44		23.085	23.59		35.985	28.12		35.475	29.57
42.695	30.43		15.085	19.11		34.5	22.16		13	15.05
27.13	18.15		37.42	33.29		64.755	19.66		33.425	27.69
51.65	24.98		45.2	34.67		97.125	29.26		31.325	34.22
41.62	25.29		29.28	31.72		79.345	33.2		35.78	23.64
27.08	19.3		21.705	26.96		73.1	27.87		37.625	19.5
34.145	35.89		35.835	28.04		63.935	17.81		44.89	26.59
42.845	33.23		38.65	40.66		77.35	11.91		45.15	32.18
33.63	23.59		14.59	19.11		51.96	15.46		19.71	18.22
28.82	25.19		20.935	27.85		55.645	19.23		22.42	20.55
31.225	20.36		25.03	20.84		64.195	18.41		30.97	35.94
67.375	25.68		30.305	19.73		54.415	33.04		45.92	24.88
67.265	30.04		45.815	30.85		64.14	25.08		28	16.85
45.2	25.4		41.465	24.64		37.265	17.21		45.51	21.37
40.285	33.52		41.465	14.23		68.8	24.32		51.905	20.92
17.66	20.31		95.88	30.23		20.885	17.76		17.25	22.22
31.43	24.74		52.265	36.95		72.18	20.42		26.21	28.75
46.94	31.71		43	31.33		67.57	28.26		21.705	23.97
18.89	18.86		32.66	22.26		31.225	23.37		24.625	26.26
18.43	19.67		26.975	20.47		71	26.6		36.55	29.58
57.69	35.36		26.57	21.12		59.175	28.82		53.185	35.63
27.335	22.39		12.13	14.44		35.78	16.07		48.63	36.96
17.1	14.14		12.13	14.37		28.615	14.41		33.325	30.38
57.42	32.54		24.24	24.06		30.05	22.53		23.445	21.26
37.625	29.72		18.785	23.3		72.74	35.93		22.37	20.27
32.66	23.26		31.615	17.55		57.795	28.06		37.215	29.86
56.66	33.31		25.645	14.48		31.02	13.61		37.675	22.6
73.355	27.95		39.725	24.21		97.62	35.35		25.545	9.49
50.885	29.91		72.535	33.34		82.52	43.74		31.89	20.64
39.09	19		30.715	21.09		75.71	34.82		40.695	26.41
35.885	17.64		20.525	22.28		40.44	26.1		59.34	29.81
72.435	30.12		37.725	24.88		38.43	18.13		41.565	18.44
30.46	19.47		19.71	29.04		58.51	39.67		63.325	28.43
30.355	18.04		44.585	37.26		44.79	37		50.425	33.23
67.355	32.5		36.5	34.69		29.125	19.78		39.415	26.57
54.21	44.56		17.915	25.74		69.105	29.84		26.515	17.61
54.26	31.16		29.025	39.61		61.325	40.55		55.9	25.63
25.05	19.75		29.025	33.68		57.95	30.81		49.04	32.15
76.02	32.56		23.6	28.62		40.75	21.54		15.255	21.11
99.925	40.33		29.125	30		36.805	27.74		16.74	16.15
78.575	40.42		20.785	18.32		86.87	33.67		27.54	25.72
62.695	28.92		15.92	14.34		90.66	32.49		35.115	27.82
41.515	22.11		13.67	14.91		28.77	30.57		31.33	21.55
57.28	30.46		28.31	25.15		78.475	26.01		26.925	22.65
36.855	27.48		25.975	27.68		30.56	24.75		40.285	19.95
43.92	25.44		28.155	29.08		34.91	21.58		33.835	26.1
53.545	31.2		16.945	19.66		54.62	20.64		39.875	32.57
52.37	28.79		10.545	10.5		67.625	24.81		27.49	25.72
51.6	30.08		14.42	15.93		17.15	10.86		41.925	31.01
32.815	24.67		20.525	20.54		16.43	9.82		48.12	32.97
31.89	21.78		18.175	16.88		88.405	25.56		29.64	29.4
51.855	28.02		14.78	18.8		69.26	26.78		23.6	25.04
49.655	29.82		20.92	21.12		31.48	30.53		36.19	32.08
32.76	22.94		33.325	21.89		39.005	29.54		53.495	24.8
35.27	17.29		27.285	33.09		83.545	40.89		40.545	31.35
36.395	32.74		25.39	19.97		67.675	42.18		13.67	13.97
40.95	36.61		36.855	16.08		43.205	18.45		7.83	8.2
33.48	22.78		15.92	25.12		32.865	13.28		22.78	23.08
24.725	25.04		30.05	30.98		20.73	28.02		48.99	32.24
27.85	17.92		30.35	37.23		35.17	36.02		39.11	33.26
72.74	34.89		31.995	30.65		33.685	28.3		15	15.75
55.03	30.64		12.745	19.94		19.195	21.49		18.225	20.62
45.25	25.82		12.08	17.34		62.81	30.44		59.585	35.57
			9.165	14.38		34.655	32.71		27.59	20.31
			70.44	36.33		45.92	27.3
			14.075	17.26		28.31	28.2
			10.94	13.66		58.92	23.3
			12.8	15.32		66.55	32.91
			25.495	18.23		52.315	31.04
			16.43	16.64		28.565	23.1
			13.615	11.61		33.12	33.31
			38.03	20.1		44.435	36.96
			24.545	21.76		60.3	33.28
			16.84	14.49		40.595	25.72
			28.36	15.84		72.025	23.21
			28.36	20.54		37.06	13.11
			38.29	31.91		40.39	18.75
			32.815	27.73		64.14	25.68
			31.02	13.71		76.375	35.13
			31.33	19.29		51.905	39.03
			35.475	34.35
			33.99	28.71
			48.885	32.86
			8.445	12.86
			10.545	10.42
			17.765	16.67
			11.26	9.63
			38.495	29.49
			27.95	19.07
			14.385	17.21
			18.375	17.18
			23.19	25.94
			28.46	29.6
