# Supplementary material for: Distinct roles of nonmuscle myosin II isoforms for establishing tension and elasticity during cell morphodynamics
Source: eLife journal article supplement (doi:10.7554/elife.71888), 2021-08-10
Supplement: data1 [file Figure 3_figure supplement 2_source data.xlsx]

## Sheet: Tabelle2
Column1	xc	yc	R	sigma	experiment	relative error
0	7147893353651364	1.02358e+16	2814556291187612	2785658618101602	WT	9897327784217752
1	1.03921e+16	6008252716789623	1.78854e+16	5809189502980419	WT	3.24801e+16
2	2.7377e+16	5354147992428004	3.00857e+16	1.03147e+16	WT	3428442663439083
3	7651475407035916	2726150315199021	1.82597e+16	4.29349e+16	WT	2.35134e+16
4	6887169142159571	95437648976845	3070275603623097	2.81163e+16	NM IIA-KO	9157590176357182
5	1.24021e+16	4.44734e+16	3591739095226809	4649251827140045	NM IIA-KO	1.29443e+16
6	3017623733799668	4.52266e+16	2508681656120721	1.82473e+16	NM IIA-KO	7273675663293132
7	7220116974781724	1.23365e+16	2.11033e+16	3.75128e+16	NM IIA-KO	1.77758e+16
8	5906827527529816	1130445054688084	5281277772309531	1131967584403009	NM IIB-KO	2.14336e+16
9	1.3233e+16	4.65379e+16	472315998729989	2.88099e+16	NM IIB-KO	6099718059146078
10	7594998934416691	-1.6407e+16	4500773986105053	1.78027e+16	NM IIB-KO	3.95548e+16
11	1493980839627584	3598165159030559	3976173590302775	8203589129128085	NM IIB-KO	2.06319e+16
12	7116048281838274	1.0995e+16	3.20186e+16	3.2058e+16	NM IIA-KO	1.00123e+16
13	1.17477e+16	6056636393592554	288395609011531	4265999120514383	NM IIA-KO	1.47922e+16
14	7484483423693515	3097958924608595	1805867825236225	4121796653654695	NM IIA-KO	2282446475901703
15	5258472172194234	6105895226904335	1.02826e+16	5.0243e+16	NM IIA-KO	4886230039975659
16	5998393634132163	1.11281e+16	4375282536825932	1.4112e+16	NM IIB-KO	3225394198248294
17	1.33918e+16	768850173688546	5431242023880304	2.47533e+16	NM IIB-KO	4557578833780624
18	-1.15305e+16	5948412719144022	6259457692736644	5264463073767417	NM IIB-KO	8410414020173346
19	7681896734456876	-1.23291e+16	4677838847970657	1.74004e+16	NM IIB-KO	3.71976e+16
20	7259245506616745	1.36439e+16	6103624967173087	1.23658e+16	WT	2.02597e+16
21	581674666092228	6791367727434589	4050492036198417	8057904744724944	WT	1.98936e+16
22	5.09733e+16	-2725717094707136	4.38599e+16	1.78572e+16	WT	4.07141e+16
23	1.25955e+16	5422408589124434	4595256288392051	2.96269e+16	WT	6447272345560079
24	7530307937385747	8676181303226232	2.39454e+16	3330482139508701	NM IIA-KO	1390865562931968
25	1.0089e+16	4952453924005774	1.57706e+16	6300736501336624	NM IIA-KO	3995242033696763
26	3955900166717811	4716602009038597	2.09322e+16	2764588716656175	NM IIA-KO	1.32074e+16
27	7663583390436437	1.55253e+16	2028831658845301	3.7752e+16	NM IIA-KO	1.86078e+16
28	7385867423391835	1.01437e+16	2593416919647766	3119434722964077	WT	1.20283e+16
29	1.22794e+16	5795255262059187	3815877125912224	3220139855727044	WT	8438793361191463
30	6020213216208659	1.30977e+16	3284613979197573	2.10074e+16	WT	6395708121636746
31	2.752e+16	6845125187654894	2701975139115159	1.15303e+16	WT	4.26736e+16
32	5770276389995696	9121710302637106	2.67315e+16	2582522540659496	NM IIC-KO	9660972008664288
33	1.00739e+16	5180260088022045	2.17132e+16	4887295099743594	NM IIC-KO	2.25084e+16
34	6833532371778753	-1665731784977595	3.05368e+16	2673193730183816	NM IIC-KO	8754010171777172
35	1.16024e+16	3901349731302411	3.56513e+16	9223123619245894	NM IIC-KO	2.58704e+16
36	7030305582160179	7694098532868838	1.56072e+16	4.45117e+16	NM IIA-KO	2851998905235105
37	1055346209262802	4951354731632835	2.02791e+16	5258643477235538	NM IIA-KO	2593131362814515
38	3449942349481272	4784439407065261	2.47124e+16	1.47832e+16	NM IIA-KO	5982114690107175
39	7273976412775106	903979948153289	2.54904e+16	3.13154e+16	NM IIA-KO	1.22852e+16
40	4886448824770588	108978186025756	3.74689e+16	2.08784e+16	NM IIC-KO	5572189476848881
41	1.08753e+16	6123926118918464	3.20367e+16	4.15873e+16	NM IIC-KO	1.29811e+16
42	5994815317683118	-1.26687e+16	4.78571e+16	1.31976e+16	NM IIC-KO	2757704765061884
43	-8099374958990614	4361645430569622	499835301581484	2716788034680955	NM IIC-KO	5435366461882564
44	5305937759901373	1.31764e+16	638908973434481	9891581926044234	NM IIB-KO	1.5482e+16
45	1435160918179757	5900540924196472	5985452854388969	2683256699257328	NM IIB-KO	4.48296e+16
46	6575022243763409	-4.90932e+16	8083513486123995	9228042297929916	NM IIB-KO	1.14159e+16
47	1926570222234602	4526229641841699	4564072981756004	7405806306195426	NM IIB-KO	1.62263e+16
48	5128315616940163	1.32482e+16	626198713275169	8731146474800605	NM IIB-KO	1.39431e+16
49	1.43107e+16	6607786018114543	5940555880559831	2.54787e+16	NM IIB-KO	4.28894e+16
50	7906783973525164	-564852773247308	8512501061443509	1.11136e+16	NM IIB-KO	130555837200907
51	-319633905222745	4336109067694871	7506202655621505	1087996032953785	NM IIB-KO	1.44946e+16
52	5063313019718704	1.02245e+16	436579650335589	1.33932e+16	NM IIC-KO	3.06777e+16
53	1.13169e+16	5021694940626447	3554056506411905	3.26072e+16	NM IIC-KO	917463973491477
54	6480629070704789	-6008423732252601	3213285553143078	2431917684767502	NM IIC-KO	756832109859866
55	2.55234e+16	3618812358407577	2.1877e+16	1367228913252016	NM IIC-KO	6249628925855664
56	6295076310946657	8862438401411595	2.07649e+16	3.23939e+16	NM IIC-KO	1.56003e+16
57	1.00589e+16	5734494434059948	1907265889581046	5398656485478844	NM IIC-KO	2.83057e+16
58	2.15996e+16	4.58608e+16	2851307754790219	1068114425162946	NM IIC-KO	3746050994911038
59	7215347907395492	4419985411498226	3.12159e+16	2.38799e+16	NM IIC-KO	7649924390665087
60	6520806410855103	9776194551637128	29216991928884	2.82447e+16	WT	9667203147844682
61	1.2301e+16	5907991984953202	336859054340435	364991806921127	WT	1083514906956488
62	7938626913978175	1.01347e+16	2730439177745726	3.20726e+16	WT	1.17463e+16
63	1.90661e+16	4364072768142762	367093959880514	8169125199305357	WT	2.22535e+16
64	6870291055162536	9058905276766960	2417424817313951	322537439334127	NM IIA-KO	1334219112106679
65	1194694614097628	5193857402767104	3310339092813672	3645294205731401	NM IIA-KO	110118453231721
66	7116838851406321	1.15704e+16	2444415414113965	3234896443212101	NM IIA-KO	1323382443317092
67	2.995e+16	4806342551274878	2.54612e+16	1668927928314771	NM IIA-KO	6554787845300614
68	7073267974121162	9520027690081286	2.93722e+16	2822981360618284	WT	9611071785995032
69	1024446840575998	5195111507620836	1.7041e+16	6198675351071805	WT	3637512480979764
70	2.87666e+16	4.57473e+16	2.80746e+16	1.47942e+16	WT	5269605133768187
71	7592945328207645	1.9747e+16	1.7413e+16	4447010610335534	WT	2.55385e+16
72	6770294307029976	1058302687456818	4.13663e+16	1.70185e+16	NM IIB-KO	4.1141e+16
73	1.50613e+16	732233466322328	6359391210899236	2.42553e+16	NM IIB-KO	3.8141e+16
74	-1.08087e+16	5389153521782246	668751777574133	1.24387e+16	NM IIB-KO	1859983477764919
75	881151002107079	-3.29469e+16	6300280096628363	1901872728909244	NM IIB-KO	3018711390192071
76	6364700540011388	1207371955169026	5.07684e+16	1402071147458046	WT	2.7617e+16
77	1.39987e+16	6579644806940797	5050261097397302	2.9203e+16	WT	5782464119859266
78	8145875396030171	-1264637702728582	4.7998e+16	2209567100984239	WT	4603459794968794
79	1491215141407962	4.68364e+16	4.12372e+16	1.31788e+16	WT	3195854194013992
80	636208011882354	9479601556369162	2902891899916994	252875962839275	NM IIA-KO	8711173945075453
81	991776409051359	4765677151492573	1.86336e+16	5656070148692963	NM IIA-KO	3.03542e+16
82	3241119617973974	4.64022e+16	2.20871e+16	2091373484067238	NM IIA-KO	9468755951450732
83	6801313147467918	2.34989e+16	1.45744e+16	4601527620141434	NM IIA-KO	3.15727e+16
84	6794261236737219	9329221357937292	3.0016e+16	2.27949e+16	NM IIC-KO	7594248280433771
85	1.12576e+16	513626696662416	2.29449e+16	4882509721437529	NM IIC-KO	2127927176013266
86	7953251915122253	1181592287761822	2.25482e+16	352282451031736	NM IIC-KO	1.56235e+16
87	2.56294e+16	4.17759e+16	3.40681e+16	1353624171058445	NM IIC-KO	3973284848421888
88	4973834386289725	1.28929e+16	590701761017762	101407546828711	NM IIB-KO	1.71673e+16
89	1363070358415322	7406342619748289	5660562919075845	2542044225058855	NM IIB-KO	4490797578615863
90	2521504143719028	5475110048473953	4579701508502801	5611717731171564	NM IIB-KO	1.22535e+16
91	760755492031918	-3.67896e+16	7225822880979593	1212943165132651	NM IIB-KO	167862288504948
92	5692683572678566	1.07247e+16	3731289862396854	1.69265e+16	NM IIC-KO	4536356052365955
93	1.19373e+16	5672621020565753	3.33342e+16	3754307317150053	NM IIC-KO	1.12626e+16
94	7043782620520481	-1.20622e+16	4.83549e+16	2.2727e+16	NM IIC-KO	4.70004e+16
95	1.68876e+16	4528255151949187	3535338537329972	9490056654284134	NM IIC-KO	2684341698560897
