# Supplementary material for: Distinct roles of nonmuscle myosin II isoforms for establishing tension and elasticity during cell morphodynamics
Source: eLife journal article supplement (doi:10.7554/elife.71888), 2021-08-10
Supplement: data1 [file Figure 3_figure supplement 3_source data.xlsx]

## Sheet: Tabelle2
Column1	Column2	Column3	Column4	Column5	Column6	Column7	Column8	Column9
	filename	experiment	actinintensity	fnsize	cellsize	coherencymean	fncoherency	date
0	Zellen auf Kreuzpattern/NMIIA-KO/20180313/IP-ApoTome-31.czi	NM IIA-KO	20238738.645454545	91013	31934957	0.5648473552038915	0.5096408344101888	20180313
1	Zellen auf Kreuzpattern/NMIIA-KO/20180313/IP-ApoTome-26.czi	NM IIA-KO	41827161.96363636	65	43356238	0.5911720938518698	0.35698818535758897	20180313
2	Zellen auf Kreuzpattern/NMIIA-KO/20180313/IP-ApoTome-39.czi	NM IIA-KO	40317814.872727275	46905	36760404	0.5814728804395077	0.4806338179062716	20180313
3	Zellen auf Kreuzpattern/NMIIA-KO/20180313/IP-ApoTome-32.czi	NM IIA-KO	35418358.29090909	95138	40900604	0.5845299986278931	0.4401657600991333	20180313
4	Zellen auf Kreuzpattern/NMIIA-KO/20180313/IP-ApoTome-25.czi	NM IIA-KO	30544540.2	83483	29295598	0.5696346939222746	0.401041104295513	20180313
5	Zellen auf Kreuzpattern/NMIIA-KO/20180313/IP-ApoTome-36.czi	NM IIA-KO	22401284.327272728	68446	36585517	0.5251686890197561	0.3570749435523521	20180313
6	Zellen auf Kreuzpattern/NMIIA-KO/20180313/IP-ApoTome-30.czi	NM IIA-KO	27330457.672727272	65810	28755848	0.5916277621164223	0.3406244681051644	20180313
7	Zellen auf Kreuzpattern/NMIIA-KO/20180313/IP-ApoTome-27.czi	NM IIA-KO	26694099.89090909	71520	32202882	0.562756525953174	0.4311747571145355	20180313
8	Zellen auf Kreuzpattern/NMIIA-KO/20180313/IP-ApoTome-22.czi	NM IIA-KO	53283122.49090909	68358	47578010	0.5389035817176885	0.4586067206210812	20180313
9	Zellen auf Kreuzpattern/NMIIA-KO/20180313/IP-ApoTome-40.czi	NM IIA-KO	29230667.01818182	111846	30538192	0.6282356859895307	0.45309975251136714	20180313
10	Zellen auf Kreuzpattern/NMIIA-KO/20180313/IP-ApoTome-37.czi	NM IIA-KO	24785957.59090909	75772	30057214	0.5969171993119522	0.47528530072258407	20180313
11	Zellen auf Kreuzpattern/NMIIA-KO/20180313/IP-ApoTome-28.czi	NM IIA-KO	45823972.163636364	84836	42724074	0.5094133579115138	0.4252106145613781	20180313
12	Zellen auf Kreuzpattern/NMIIA-KO/20180313/IP-ApoTome-33.czi	NM IIA-KO	22363871.527272727	46483	27713686	0.5658835854602668	0.4361417959103917	20180313
13	Zellen auf Kreuzpattern/NMIIA-KO/20180313/IP-ApoTome-34.czi	NM IIA-KO	40380333.92727273	82259	40759126	0.603724525398312	0.5414744818231424	20180313
14	Zellen auf Kreuzpattern/NMIIA-KO/20180313/IP-ApoTome-38.czi	NM IIA-KO	39790228.03636364	63770	35420010	0.5648273391227162	0.40637305826349057	20180313
15	Zellen auf Kreuzpattern/NMIIA-KO/20180313/IP-ApoTome-24.czi	NM IIA-KO	31786362.472727273	84889	31327852	0.5771828850570413	0.5200929004978326	20180313
16	Zellen auf Kreuzpattern/NMIIA-KO/20180313/IP-ApoTome-35.czi	NM IIA-KO	50798934.36363637	28037	55240428	0.5482563965652113	0.45000789052867735	20180313
17	Zellen auf Kreuzpattern/NMIIA-KO/20180322/IP-ApoTome-16.czi	NM IIA-KO	30936249.45	77160	33814952	0.595744036543361	0.42974085350334396	20180322
19	Zellen auf Kreuzpattern/NMIIA-KO/20180322/IP-ApoTome-17.czi	NM IIA-KO	26232740.3	74179	30556433	0.6198748394487014	0.5113961760856952	20180322
20	Zellen auf Kreuzpattern/NMIIA-KO/20180322/IP-ApoTome-11.czi	NM IIA-KO	14003571.42	90306	38149530	0.5368220263788309	0.4550509731874754	20180322
21	Zellen auf Kreuzpattern/NMIIA-KO/20180322/IP-ApoTome-19.czi	NM IIA-KO	15491403.2	107578	28477874	0.6035101496691783	0.463160834161995	20180322
22	Zellen auf Kreuzpattern/NMIIA-KO/20180322/IP-ApoTome-07.czi	NM IIA-KO	26368225.24	98917	41644504	0.576713892426237	0.48536865216828273	20180322
23	Zellen auf Kreuzpattern/NMIIA-KO/20180322/IP-ApoTome-22.czi	NM IIA-KO	20426664.32	87681	34685489	0.5642329563236084	0.4724218414541771	20180322
25	Zellen auf Kreuzpattern/NMIIA-KO/20180322/IP-ApoTome-18.czi	NM IIA-KO	29756414.72	120616	31584392	0.5661631225954896	0.4338533774577428	20180322
26	Zellen auf Kreuzpattern/NMIIA-KO/20180322/IP-ApoTome-21.czi	NM IIA-KO	39405432.08	83155	40532799	0.5513116427020004	0.41557848396910185	20180322
27	Zellen auf Kreuzpattern/NMIIA-KO/20180322/IP-ApoTome-12.czi	NM IIA-KO	19249185.69	90170	22770608	0.5503243479488997	0.373747794969937	20180322
28	Zellen auf Kreuzpattern/NMIIA-KO/20180322/IP-ApoTome-01.czi	NM IIA-KO	17771223.016666666	88819	27763219	0.5404528920079477	0.36352377030150784	20180322
31	Zellen auf Kreuzpattern/NMIIA-KO/20180322/IP-ApoTome-14.czi	NM IIA-KO	15467279.7	54484	24980650	0.5588625596211467	0.41228240220078755	20180322
33	Zellen auf Kreuzpattern/NMIIA-KO/20180322/IP-ApoTome-15.czi	NM IIA-KO	22358583.81	74613	27245849	0.6103817502622143	0.5499428037868062	20180322
34	Zellen auf Kreuzpattern/NMIIA-KO/20180322/IP-ApoTome-09.czi	NM IIA-KO	21275829.43	59201	29570336	0.5843637353325982	0.4705387936317123	20180322
36	Zellen auf Kreuzpattern/NMIIA-KO/20180322/IP-ApoTome-13.czi	NM IIA-KO	20920180.22	71784	27224114	0.5928434622335185	0.3947256066796233	20180322
37	Zellen auf Kreuzpattern/NMIIA-KO/20180126/IIA_KO_11.czi	NM IIA-KO	62822614.85	116165	55343006	0.5943118087947734	0.5088887115846028	20180126
38	Zellen auf Kreuzpattern/NMIIA-KO/20180126/IIA_KO_30.czi	NM IIA-KO	19452328.675	80707	36797505	0.5701662109971858	0.4815074469106432	20180126
39	Zellen auf Kreuzpattern/NMIIA-KO/20180126/IIA_KO_22.czi	NM IIA-KO	26880929.68	105716	47476410	0.5825129574877291	0.4820320885219385	20180126
40	Zellen auf Kreuzpattern/NMIIA-KO/20180126/IIA_KO_23.czi	NM IIA-KO	18497701.9	67448	32081978	0.5904646527717212	0.4720095843342303	20180126
41	Zellen auf Kreuzpattern/NMIIA-KO/20180126/IIA_KO_27.czi	NM IIA-KO	20177933.79	90864	46705565	0.5863970171434603	0.43975569396508013	20180126
42	Zellen auf Kreuzpattern/NMIIA-KO/20180126/IIA_KO_2.czi	NM IIA-KO	23562433.47	111042	41205404	0.6592818262381313	0.5620438254763087	20180126
43	Zellen auf Kreuzpattern/NMIIA-KO/20180126/IIA_KO_16.czi	NM IIA-KO	19573898.545	94597	35868620	0.6287583966152029	0.5413279430696434	20180126
44	Zellen auf Kreuzpattern/NMIIA-KO/20180126/IIA_KO_10.czi	NM IIA-KO	43826112.76	94535	42515028	0.510480623463308	0.3975456284242085	20180126
45	Zellen auf Kreuzpattern/NMIIA-KO/20180126/IIA_KO_38.czi	NM IIA-KO	25986063.79	104602	46633086	0.5606440886198267	0.4471811847987845	20180126
46	Zellen auf Kreuzpattern/NMIIA-KO/20180126/IIA_KO_45.czi	NM IIA-KO	20693629.775	81112	37572706	0.6018048314113974	0.4867060756803612	20180126
47	Zellen auf Kreuzpattern/NMIIA-KO/20180126/IIA_KO_6.czi	NM IIA-KO	50965703.78947368	88128	43892344	0.5831874005179583	0.454726576358214	20180126
48	Zellen auf Kreuzpattern/NMIIA-KO/20180126/IIA_KO_44.czi	NM IIA-KO	15969641.3	111296	27404314	0.6043461259420688	0.40393789580925404	20180126
49	Zellen auf Kreuzpattern/NMIIA-KO/20180126/IIA_KO_25.czi	NM IIA-KO	24293286.785	94553	46490130	0.5610066050578908	0.44714354644726445	20180126
50	Zellen auf Kreuzpattern/NMIIA-KO/20180126/IIA_KO_40.czi	NM IIA-KO	22709934.75	87240	42820844	0.5416644286600236	0.42982997426298986	20180126
51	Zellen auf Kreuzpattern/NMIIA-KO/20180126/IIA_KO_18.czi	NM IIA-KO	19839297.89	90368	36100258	0.598498104916591	0.46273516392200437	20180126
52	Zellen auf Kreuzpattern/NMIIA-KO/20180126/IIA_KO_33.czi	NM IIA-KO	20536862.91	85027	37657028	0.5345243389892586	0.43100524132729334	20180126
53	Zellen auf Kreuzpattern/NMIIA-KO/20180126/IIA_KO_19.czi	NM IIA-KO	25272844.165	112845	46268210	0.589311494868723	0.5137432539287091	20180126
54	Zellen auf Kreuzpattern/NMIIA-KO/20180126/IIA_KO_21.czi	NM IIA-KO	28695214.075	110529	50420947	0.5631558645655743	0.4811552297066242	20180126
55	Zellen auf Kreuzpattern/NMIIA-KO/20180126/IIA_KO_14.czi	NM IIA-KO	35895126.04	75086	33316436	0.49746653573629546	0.3692162406338534	20180126
57	Zellen auf Kreuzpattern/NMIIA-KO/20180126/IIA_KO_42.czi	NM IIA-KO	26000635.615	107646	46411551	0.5612149871914429	0.4386244265115642	20180126
58	Zellen auf Kreuzpattern/NMIIA-KO/20180126/IIA_KO_24.czi	NM IIA-KO	24588835.78	81405	43233848	0.5866326772486224	0.42424486000208106	20180126
59	Zellen auf Kreuzpattern/NMIIA-KO/20180126/IIA_KO_3b.czi	NM IIA-KO	21690042.52	100299	40132254	0.5482317539403593	0.4468539305728617	20180126
60	Zellen auf Kreuzpattern/NMIIA-KO/20180126/IIA_KO_26.czi	NM IIA-KO	30654257.06	93569	50534570	0.5738570250028842	0.42021204745519697	20180126
61	Zellen auf Kreuzpattern/NMIIA-KO/20180126/IIA_KO_34.czi	NM IIA-KO	18050658.655	76785	32850841	0.5754652673884361	0.46697337619331025	20180126
62	Zellen auf Kreuzpattern/NMIIA-KO/20180126/IIA_KO_39.czi	NM IIA-KO	28543268.165	115778	54408436	0.5563102383608307	0.4252440448849452	20180126
63	Zellen auf Kreuzpattern/NMIIA-KO/20180126/IIA_KO_41.czi	NM IIA-KO	20229542.84	88160	44679362	0.5137620810252393	0.38579738904368993	20180126
64	Zellen auf Kreuzpattern/NMIIA-KO/20180126/IIA_KO_36.czi	NM IIA-KO	22188039.77	105096	42680963	0.6310136910453497	0.5151800810559495	20180126
65	Zellen auf Kreuzpattern/NMIIA-KO/20180126/IIA_KO_4.czi	NM IIA-KO	25130797.97	92212	45284390	0.5560293072292681	0.43512205848163543	20180126
66	Zellen auf Kreuzpattern/NMIIA-KO/20180126/IIA_KO_12.czi	NM IIA-KO	15081035.525	87290	35188743	0.5389852089914096	0.4438702608401437	20180126
67	Zellen auf Kreuzpattern/NMIIA-KO/20180126/IIA_KO_37.czi	NM IIA-KO	23659327.5	108624	38878777	0.5635954032196023	0.38622768926515444	20180126
68	Zellen auf Kreuzpattern/NMIIA-KO/20180126/IIA_KO_9.czi	NM IIA-KO	22938148.275	101604	41619945	0.5840623287704969	0.492659136101336	20180126
69	Zellen auf Kreuzpattern/NMIIA-KO/20180126/IIA_KO_5.czi	NM IIA-KO	25732372.21	91758	43671998	0.5452726481623305	0.4219888773066442	20180126
70	Zellen auf Kreuzpattern/NMIIA-KO/20180126/IIA_KO_35.czi	NM IIA-KO	25331967.405	94998	47826850	0.6065882657963048	0.47070787543451004	20180126
71	Zellen auf Kreuzpattern/NMIIA-KO/20180126/IIA_KO_7.czi	NM IIA-KO	38129098.515	86440	73422011	0.5543702146758143	0.469233342482005	20180126
72	Zellen auf Kreuzpattern/NMIIA-KO/20180126/IIA_KO_43.czi	NM IIA-KO	28644655.87	87085	49034042	0.5495369115195521	0.4330557867493354	20180126
73	Zellen auf Kreuzpattern/NMIIA-KO/20180126/IIA_KO_13.czi	NM IIA-KO	27754270.33	117679	48187864	0.5693196112614579	0.49290560533082733	20180126
74	Zellen auf Kreuzpattern/NMIIA-KO/20180126/IIA_KO_29.czi	NM IIA-KO	19064640.13	96991	34777172	0.5990306514859806	0.44467757902456795	20180126
75	Zellen auf Kreuzpattern/NMIIA-KO/20180126/IIA_KO_20.czi	NM IIA-KO	20041825.67	95319	35360864	0.5937340784433321	0.5592720173666613	20180126
76	Zellen auf Kreuzpattern/NMIIA-KO/20180126/IIA_KO_28.czi	NM IIA-KO	18051872.965	93073	33572040	0.5680622923122932	0.3705671786524405	20180126
77	Zellen auf Kreuzpattern/NMIIA-KO/20180126/IIA_KO_17.czi	NM IIA-KO	18671504.64	113351	34584386	0.6393192581183891	0.565175574279043	20180126
78	Zellen auf Kreuzpattern/NMIIA-KO/20180126/IIA_KO_31.czi	NM IIA-KO	24436558.4	95907	43307254	0.6327627237690941	0.5703665163212354	20180126
79	Zellen auf Kreuzpattern/NMIIA-KO/20180126/IIA_KO.czi	NM IIA-KO	33341891.225	77305	36919123	0.5976459408312598	0.4857584837200564	20180126
80	Zellen auf Kreuzpattern/NMIIA-KO/20180126/IIA_KO_32.czi	NM IIA-KO	27252657.57	114168	48930538	0.5743089928829314	0.46288635339386097	20180126
81	Zellen auf Kreuzpattern/NMIIA-KO/20180126/IIA_KO_8.czi	NM IIA-KO	38823453.48235294	85466	30348936	0.5711556411730546	0.47574766653479816	20180126
82	Zellen auf Kreuzpattern/NMIIC-KO/20190805_NM IIC-KO_FN-Kreuzpattern/Snap-23748.czi	NM IIC-KO	10115116.31	141411	62194948	0.5573834067680223	0.5598870272073007	20190805
83	Zellen auf Kreuzpattern/NMIIC-KO/20190805_NM IIC-KO_FN-Kreuzpattern/Snap-23745.czi	NM IIC-KO	6340013.57	91923	39432484	0.6395707153523476	0.5873921901430837	20190805
84	Zellen auf Kreuzpattern/NMIIC-KO/20190805_NM IIC-KO_FN-Kreuzpattern/Snap-23757.czi	NM IIC-KO	7348490.3875	143158	42711370	0.6717355589389897	0.5985526803793201	20190805
85	Zellen auf Kreuzpattern/NMIIC-KO/20190805_NM IIC-KO_FN-Kreuzpattern/Snap-23742.czi	NM IIC-KO	7409065.625	107072	45004482	0.6415091723531003	0.5770831815810975	20190805
86	Zellen auf Kreuzpattern/NMIIC-KO/20190805_NM IIC-KO_FN-Kreuzpattern/Snap-23738.czi	NM IIC-KO	6647173.2975	107860	39664640	0.6648461702917259	0.5922443491300663	20190805
87	Zellen auf Kreuzpattern/NMIIC-KO/20190805_NM IIC-KO_FN-Kreuzpattern/Snap-23747.czi	NM IIC-KO	8212014.2325	127162	51649884	0.6299907275687202	0.5074488548194481	20190805
88	Zellen auf Kreuzpattern/NMIIC-KO/20190805_NM IIC-KO_FN-Kreuzpattern/Snap-23749.czi	NM IIC-KO	6892889.5925	122537	41029890	0.6403175831083144	0.5713311393653401	20190805
89	Zellen auf Kreuzpattern/NMIIC-KO/20190805_NM IIC-KO_FN-Kreuzpattern/Snap-23751.czi	NM IIC-KO	5861053.34125	90915	40416473	0.5919104816494007	0.49750943519038554	20190805
90	Zellen auf Kreuzpattern/NMIIC-KO/20190805_NM IIC-KO_FN-Kreuzpattern/Snap-23750.czi	NM IIC-KO	8004298.4225	101526	50813716	0.603358746681703	0.523720140944161	20190805
91	Zellen auf Kreuzpattern/NMIIC-KO/20190805_NM IIC-KO_FN-Kreuzpattern/Snap-23758.czi	NM IIC-KO	8235558.7275	103354	50539650	0.6521144487545917	0.557209917184567	20190805
92	Zellen auf Kreuzpattern/NMIIC-KO/20190805_NM IIC-KO_FN-Kreuzpattern/Snap-23759.czi	NM IIC-KO	6876263.055	128322	42163492	0.6714274045422993	0.5437420857249322	20190805
93	Zellen auf Kreuzpattern/NMIIC-KO/20190805_NM IIC-KO_FN-Kreuzpattern/Snap-23756.czi	NM IIC-KO	8958873.8	107477	52222654	0.6542991859433265	0.5811746926760508	20190805
94	Zellen auf Kreuzpattern/NMIIC-KO/20190805_NM IIC-KO_FN-Kreuzpattern/Snap-23755.czi	NM IIC-KO	7477430.39	95806	47688754	0.6832987500575083	0.591241368456713	20190805
95	Zellen auf Kreuzpattern/NMIIC-KO/20190805_NM IIC-KO_FN-Kreuzpattern/Snap-23740.czi	NM IIC-KO	6113248.21	104201	37676328	0.5969065244362455	0.5037588214949873	20190805
96	Zellen auf Kreuzpattern/NMIIC-KO/20190805_NM IIC-KO_FN-Kreuzpattern/Snap-23752.czi	NM IIC-KO	7646036.2375	111294	45320204	0.6301210382901189	0.584150678149226	20190805
98	Zellen auf Kreuzpattern/NMIIC-KO/20190805_NM IIC-KO_FN-Kreuzpattern/Snap-23741.czi	NM IIC-KO	6474440.7925	87503	39909242	0.5681617305585508	0.5482650648908065	20190805
99	Zellen auf Kreuzpattern/NMIIC-KO/20190805_NM IIC-KO_FN-Kreuzpattern/Snap-23743.czi	NM IIC-KO	6694771.7125	103229	40110410	0.714817175890249	0.6251622566374618	20190805
100	Zellen auf Kreuzpattern/NMIIC-KO/20190805_NM IIC-KO_FN-Kreuzpattern/Snap-23739.czi	NM IIC-KO	5692390.075	82859	32238442	0.6250060719435511	0.5146724948878129	20190805
101	Zellen auf Kreuzpattern/NMIIC-KO/20190805_NM IIC-KO_FN-Kreuzpattern/Snap-23744.czi	NM IIC-KO	9291353.82	126760	54360064	0.6798873525976717	0.6382609657845174	20190805
102	Zellen auf Kreuzpattern/NMIIC-KO/20190805_NM IIC-KO_FN-Kreuzpattern/Snap-23746.czi	NM IIC-KO	7427079.0275	126027	44665392	0.6857647191364625	0.6232537792355538	20190805
103	Zellen auf Kreuzpattern/NMIIC-KO/20190612_NM IIC-KO_FN Kreuzpattern/NM IIC-KO (16).czi	NM IIC-KO	43008753.81052632	119207	56749533	0.6463574598931061	0.48916382935177033	20190612
104	Zellen auf Kreuzpattern/NMIIC-KO/20190612_NM IIC-KO_FN Kreuzpattern/NM IIC-KO (11).czi	NM IIC-KO	35468097.22105263	124859	49068228	0.6571817918511343	0.5708257403521079	20190612
105	Zellen auf Kreuzpattern/NMIIC-KO/20190612_NM IIC-KO_FN Kreuzpattern/NM IIC-KO (5).czi	NM IIC-KO	19044805.547368422	101748	31308802	0.666246252411702	0.5551604494895025	20190612
106	Zellen auf Kreuzpattern/NMIIC-KO/20190612_NM IIC-KO_FN Kreuzpattern/NM IIC-KO (10).czi	NM IIC-KO	28323981.97368421	100367	36330902	0.6203551456002937	0.455567636733121	20190612
107	Zellen auf Kreuzpattern/NMIIC-KO/20190612_NM IIC-KO_FN Kreuzpattern/NM IIC-KO (18).czi	NM IIC-KO	28290510.705263156	123968	43534838	0.6589943897344926	0.4614168893795138	20190612
108	Zellen auf Kreuzpattern/NMIIC-KO/20190612_NM IIC-KO_FN Kreuzpattern/NM IIC-KO (13).czi	NM IIC-KO	32129559.410526317	116519	45722540	0.665252280385123	0.47677744754710905	20190612
109	Zellen auf Kreuzpattern/NMIIC-KO/20190612_NM IIC-KO_FN Kreuzpattern/NM IIC-KO (27).czi	NM IIC-KO	33958300.526315786	95729	45770546	0.6043931833367249	0.46647851606649343	20190612
110	Zellen auf Kreuzpattern/NMIIC-KO/20190612_NM IIC-KO_FN Kreuzpattern/NM IIC-KO (17).czi	NM IIC-KO	21794424.557894737	126048	33841436	0.6665924578377821	0.5248610456606705	20190612
111	Zellen auf Kreuzpattern/NMIIC-KO/20190612_NM IIC-KO_FN Kreuzpattern/NM IIC-KO (8).czi	NM IIC-KO	34253040.92631579	126111	51689000	0.6631809475903964	0.5720596396140681	20190612
112	Zellen auf Kreuzpattern/NMIIC-KO/20190612_NM IIC-KO_FN Kreuzpattern/NM IIC-KO (1).czi	NM IIC-KO	28423499.557894737	32643	41263316	0.6559859125233658	0.570511378775083	20190612
114	Zellen auf Kreuzpattern/NMIIC-KO/20190612_NM IIC-KO_FN Kreuzpattern/NM IIC-KO (4).czi	NM IIC-KO	26163555.72631579	84503	38262052	0.6374676925325385	0.5013731892681185	20190612
115	Zellen auf Kreuzpattern/NMIIC-KO/20190612_NM IIC-KO_FN Kreuzpattern/NM IIC-KO (28).czi	NM IIC-KO	50895777.08421053	125724	71229728	0.6641779117842482	0.5029531876692958	20190612
116	Zellen auf Kreuzpattern/NMIIC-KO/20190612_NM IIC-KO_FN Kreuzpattern/NM IIC-KO (2).czi	NM IIC-KO	39559476.75789474	137451	53821838	0.6084650992409438	0.47478418191720184	20190612
117	Zellen auf Kreuzpattern/NMIIC-KO/20190612_NM IIC-KO_FN Kreuzpattern/NM IIC-KO (19).czi	NM IIC-KO	31530659.8	105270	48939958	0.7066678724979698	0.6342635395423056	20190612
118	Zellen auf Kreuzpattern/NMIIC-KO/20190612_NM IIC-KO_FN Kreuzpattern/NM IIC-KO (26).czi	NM IIC-KO	23473890.136842106	87958	35684714	0.7104037880197106	0.6804616199480003	20190612
119	Zellen auf Kreuzpattern/NMIIC-KO/20190612_NM IIC-KO_FN Kreuzpattern/NM IIC-KO (24).czi	NM IIC-KO	24676880.442105263	103435	38820344	0.6670180460018592	0.5642823509356321	20190612
120	Zellen auf Kreuzpattern/NMIIC-KO/20190612_NM IIC-KO_FN Kreuzpattern/NM IIC-KO (22).czi	NM IIC-KO	25070318.936842106	103569	33139126	0.687530081511504	0.4925447779418423	20190612
121	Zellen auf Kreuzpattern/NMIIC-KO/20190612_NM IIC-KO_FN Kreuzpattern/NM IIC-KO (15).czi	NM IIC-KO	30314461.242105264	85740	41207929	0.6605267641574514	0.5295818260343679	20190612
122	Zellen auf Kreuzpattern/NMIIC-KO/20190612_NM IIC-KO_FN Kreuzpattern/NM IIC-KO (6).czi	NM IIC-KO	21180374.442105263	129346	32378396	0.6753728628187758	0.496721186988098	20190612
123	Zellen auf Kreuzpattern/NMIIC-KO/20190612_NM IIC-KO_FN Kreuzpattern/NM IIC-KO (21).czi	NM IIC-KO	29685228.736842107	107252	45651674	0.6501422050810228	0.5559203938857064	20190612
124	Zellen auf Kreuzpattern/NMIIC-KO/20190612_NM IIC-KO_FN Kreuzpattern/NM IIC-KO (14).czi	NM IIC-KO	24026896.90526316	104555	38902894	0.6691946876754208	0.6130693168954501	20190612
125	Zellen auf Kreuzpattern/NMIIC-KO/20190612_NM IIC-KO_FN Kreuzpattern/NM IIC-KO (3).czi	NM IIC-KO	15256163.978947368	117889	25852628	0.6522385267756918	0.4332320410594643	20190612
126	Zellen auf Kreuzpattern/NMIIC-KO/20190612_NM IIC-KO_FN Kreuzpattern/NM IIC-KO (12).czi	NM IIC-KO	26914346.294736844	95282	35444049	0.6099835828575906	0.44132691318645806	20190612
127	Zellen auf Kreuzpattern/NMIIC-KO/20190612_NM IIC-KO_FN Kreuzpattern/NM IIC-KO (25).czi	NM IIC-KO	30586001.810526315	108738	46243240	0.6459880406303711	0.5787015017184415	20190612
128	Zellen auf Kreuzpattern/NMIIC-KO/20190612_NM IIC-KO_FN Kreuzpattern/NM IIC-KO (9).czi	NM IIC-KO	37809232.35263158	98193	52994422	0.634801149449276	0.5252245334202896	20190612
129	Zellen auf Kreuzpattern/NMIIC-KO/20190612_NM IIC-KO_FN Kreuzpattern/NM IIC-KO (7).czi	NM IIC-KO	29902102.705263156	84645	41828212	0.6465704056391414	0.5673334513997151	20190612
130	Zellen auf Kreuzpattern/NMIIC-KO/20190612_NM IIC-KO_FN Kreuzpattern/NM IIC-KO (23).czi	NM IIC-KO	19161125.968421053	87636	30602682	0.6302741047336962	0.5936230077922997	20190612
131	Zellen auf Kreuzpattern/NMIIC-KO/20190730_NM IIC-KO_FN Kreuzpattern/Snap-23533.czi	NM IIC-KO	14526025.528	139137	53840126	0.6780476702450511	0.626632217558204	20190730
132	Zellen auf Kreuzpattern/NMIIC-KO/20190730_NM IIC-KO_FN Kreuzpattern/Snap-23523.czi	NM IIC-KO	12107206.928	104533	46502066	0.6661147485361189	0.6079629870410164	20190730
133	Zellen auf Kreuzpattern/NMIIC-KO/20190730_NM IIC-KO_FN Kreuzpattern/Snap-23524.czi	NM IIC-KO	10872600.856	130580	41120822	0.6261806731392675	0.45303125449746245	20190730
134	Zellen auf Kreuzpattern/NMIIC-KO/20190730_NM IIC-KO_FN Kreuzpattern/Snap-23521.czi	NM IIC-KO	11821434.608	126935	49822100	0.6155052476712142	0.561060184907074	20190730
135	Zellen auf Kreuzpattern/NMIIC-KO/20190730_NM IIC-KO_FN Kreuzpattern/Snap-23525.czi	NM IIC-KO	16046210.872	104434	59446668	0.5939793967931054	0.49742302550724005	20190730
136	Zellen auf Kreuzpattern/NMIIC-KO/20190730_NM IIC-KO_FN Kreuzpattern/Snap-23526.czi	NM IIC-KO	13396391.332	124211	52993544	0.6793104458158149	0.6235157569509258	20190730
137	Zellen auf Kreuzpattern/NMIIC-KO/20190730_NM IIC-KO_FN Kreuzpattern/Snap-23519.czi	NM IIC-KO	8397497.692	82471	32311594	0.6733565047889621	0.6036708442488864	20190730
138	Zellen auf Kreuzpattern/NMIIC-KO/20190730_NM IIC-KO_FN Kreuzpattern/Snap-23522.czi	NM IIC-KO	13204822.684	122053	48963834	0.6420007060721593	0.5905289539323422	20190730
139	Zellen auf Kreuzpattern/NMIIC-KO/20190730_NM IIC-KO_FN Kreuzpattern/Snap-23531.czi	NM IIC-KO	12105863.38	109911	48050450	0.6467143179720481	0.5635594183086131	20190730
140	Zellen auf Kreuzpattern/NMIIC-KO/20190730_NM IIC-KO_FN Kreuzpattern/Snap-23516.czi	NM IIC-KO	7324386.185	88533	42357802	0.5947812400652895	0.49859030963964607	20190730
141	Zellen auf Kreuzpattern/NMIIC-KO/20190730_NM IIC-KO_FN Kreuzpattern/Snap-23527.czi	NM IIC-KO	15272276.416	101801	53638958	0.5809187419338012	0.4590847890493221	20190730
142	Zellen auf Kreuzpattern/NMIIC-KO/20190730_NM IIC-KO_FN Kreuzpattern/Snap-23528.czi	NM IIC-KO	10868450.532	127444	41162224	0.6548057753147644	0.5359994164291638	20190730
144	Zellen auf Kreuzpattern/NMIIC-KO/20190730_NM IIC-KO_FN Kreuzpattern/Snap-23517.czi	NM IIC-KO	8881427.175	105969	52552854	0.6328280096833561	0.49212051677992386	20190730
145	Zellen auf Kreuzpattern/NMIIC-KO/20190730_NM IIC-KO_FN Kreuzpattern/Snap-23518.czi	NM IIC-KO	8551555.8575	105497	50331624	0.6502017101613888	0.5834658939680819	20190730
146	Zellen auf Kreuzpattern/NMIIC-KO/20190730_NM IIC-KO_FN Kreuzpattern/Snap-23532.czi	NM IIC-KO	12656342.552	112060	47393606	0.6067652248280074	0.5282014857623749	20190730
147	Zellen auf Kreuzpattern/WT/20180313/IP-ApoTome-16.czi	WT	31039228.51818182	77616	34538497	0.67353619933143	0.4763208381868501	20180313
148	Zellen auf Kreuzpattern/WT/20180313/IP-ApoTome-03.czi	WT	27020921.345454544	104624	26834634	0.620066627329443	0.4254309026914974	20180313
149	Zellen auf Kreuzpattern/WT/20180313/IP-ApoTome-17.czi	WT	34937858.81818182	54127	33424876	0.6114307200421626	0.4822028773351756	20180313
150	Zellen auf Kreuzpattern/WT/20180313/IP-ApoTome-11.czi	WT	32583271.227272727	86066	31259791	0.6355869109937428	0.3904968147433991	20180313
151	Zellen auf Kreuzpattern/WT/20180313/IP-ApoTome-19.czi	WT	27346044.318181816	42073	27447048	0.6925364796971973	0.6113084457143882	20180313
152	Zellen auf Kreuzpattern/WT/20180313/IP-ApoTome-07.czi	WT	20782781.89090909	54035	20520914	0.7019375452769794	0.5847657936447893	20180313
153	Zellen auf Kreuzpattern/WT/20180313/IP-ApoTome-10.czi	WT	38113621.127272725	107435	34983674	0.6250697396734259	0.4694403190510594	20180313
154	Zellen auf Kreuzpattern/WT/20180313/IP-ApoTome-02.czi	WT	13254799.754545454	25241	14389159	0.7588023733701185	0.4320793026546719	20180313
155	Zellen auf Kreuzpattern/WT/20180313/IP-ApoTome-20.czi	WT	43428075.72727273	78152	39735252	0.6291034469845567	0.406577239142535	20180313
156	Zellen auf Kreuzpattern/WT/20180313/IP-ApoTome-18.czi	WT	25313616.945454545	61573	24647906	0.5862883443323745	0.4638941334549018	20180313
157	Zellen auf Kreuzpattern/WT/20180313/IP-ApoTome-21.czi	WT	33478092.76363636	63785	33052062	0.6096544294271262	0.5049658475838243	20180313
158	Zellen auf Kreuzpattern/WT/20180313/IP-ApoTome-12.czi	WT	31681649.89090909	99688	34077148	0.6711795834557517	0.431481749645697	20180313
159	Zellen auf Kreuzpattern/WT/20180313/IP-ApoTome-01.czi	WT	34370234.99090909	76914	31771727	0.5806861553355284	0.46141628422336983	20180313
160	Zellen auf Kreuzpattern/WT/20180313/IP-ApoTome-06.czi	WT	24294005.036363635	57441	24081486	0.5812833560188104	0.3550197661512699	20180313
161	Zellen auf Kreuzpattern/WT/20180313/IP-ApoTome-08.czi	WT	22108498.23636364	55788	21310600	0.7033742362955524	0.5021877029096983	20180313
162	Zellen auf Kreuzpattern/WT/20180313/IP-ApoTome-14.czi	WT	50189327.96363636	80184	46596808	0.6276029465365954	0.5158757285728025	20180313
163	Zellen auf Kreuzpattern/WT/20180313/IP-ApoTome-05.czi	WT	17662105.87272727	97518	17512284	0.5957020797515619	0.3348473108223766	20180313
164	Zellen auf Kreuzpattern/WT/20180313/IP-ApoTome-15.czi	WT	25989600.463636365	84366	26444390	0.6121320249776985	0.3386822051523151	20180313
165	Zellen auf Kreuzpattern/WT/20180313/IP-ApoTome-09.czi	WT	16851774.527272727	87698	16092170	0.6405051649342506	0.3144917441514454	20180313
166	Zellen auf Kreuzpattern/WT/20180313/IP-ApoTome-04.czi	WT	14925264.954545455	58552	19972159	0.6466786089575994	0.4740318340916143	20180313
167	Zellen auf Kreuzpattern/WT/20180313/IP-ApoTome-13.czi	WT	30595618.636363637	78618	28589478	0.6473035289416617	0.398457705626405	20180313
168	Zellen auf Kreuzpattern/WT/20180322/IP-ApoTome-16.czi	WT	17726072.585714284	84207	29115286	0.497280844158632	0.36163048625116584	20180322
169	Zellen auf Kreuzpattern/WT/20180322/IP-ApoTome-03.czi	WT	43352267.98571429	54413	30979421	0.6879555302211748	0.5744588056574607	20180322
170	Zellen auf Kreuzpattern/WT/20180322/IP-ApoTome-26.czi	WT	37488159.666666664	87567	31284926	0.7018720773064958	0.6039941277388877	20180322
171	Zellen auf Kreuzpattern/WT/20180322/IP-ApoTome-17.czi	WT	31253093.028571427	71369	28519906	0.6567900328984254	0.5512178066960466	20180322
172	Zellen auf Kreuzpattern/WT/20180322/IP-ApoTome-11.czi	WT	36179365.0	101229	42921704	0.5733012370617905	0.3945793140745876	20180322
173	Zellen auf Kreuzpattern/WT/20180322/IP-ApoTome-19.czi	WT	38457417.85714286	101478	30758667	0.7322316666063584	0.4574249536790572	20180322
174	Zellen auf Kreuzpattern/WT/20180322/IP-ApoTome-25.czi	WT	41922743.45	67233	33190176	0.600851348302582	0.48952142272887644	20180322
175	Zellen auf Kreuzpattern/WT/20180322/IP-ApoTome-23.czi	WT	36934857.38333333	83097	38381656	0.5960766778796621	0.45284310120274496	20180322
176	Zellen auf Kreuzpattern/WT/20180322/IP-ApoTome-27.czi	WT	28050859.283333335	109694	32270311	0.5671825102646206	0.36312729589674514	20180322
177	Zellen auf Kreuzpattern/WT/20180322/IP-ApoTome-10.czi	WT	37657465.97142857	83564	33307274	0.676185868588345	0.6426546745327247	20180322
178	Zellen auf Kreuzpattern/WT/20180322/IP-ApoTome-22.czi	WT	48755780.583333336	76267	40058479	0.6671653209798605	0.464333080245001	20180322
179	Zellen auf Kreuzpattern/WT/20180322/IP-ApoTome-20.czi	WT	27569147.9	80700	30566064	0.6058965262913799	0.4125828378640115	20180322
180	Zellen auf Kreuzpattern/WT/20180322/IP-ApoTome-18.czi	WT	53284153.87142857	93918	41173069	0.6493922520082241	0.5480191201857078	20180322
181	Zellen auf Kreuzpattern/WT/20180322/IP-ApoTome-21.czi	WT	59383708.733333334	81019	43351138	0.5918335984628593	0.45557634814918174	20180322
182	Zellen auf Kreuzpattern/WT/20180322/IP-ApoTome-12.czi	WT	30818359.685714286	106303	29202235	0.6755921935427203	0.4247046808471116	20180322
183	Zellen auf Kreuzpattern/WT/20180322/IP-ApoTome-01.czi	WT	44602262.40909091	100625	48938244	0.6548926847477404	0.47177222628556886	20180322
184	Zellen auf Kreuzpattern/WT/20180322/IP-ApoTome-08.czi	WT	38630785.614285715	85541	38562359	0.6377626430997129	0.4542075029318594	20180322
185	Zellen auf Kreuzpattern/WT/20180322/IP-ApoTome-24.czi	WT	49857737.483333334	76366	35745217	0.6354860288021191	0.4929166852061541	20180322
186	Zellen auf Kreuzpattern/WT/20180322/IP-ApoTome-14.czi	WT	30489948.34285714	81063	33190806	0.631343511212111	0.4280808408591435	20180322
187	Zellen auf Kreuzpattern/WT/20180322/IP-ApoTome-15.czi	WT	36602089.58571429	84250	35565714	0.6550022305189768	0.5714922072987987	20180322
188	Zellen auf Kreuzpattern/WT/20180322/IP-ApoTome-09.czi	WT	61278874.071428575	70725	42536364	0.7229340523792772	0.660017446378745	20180322
189	Zellen auf Kreuzpattern/WT/20180322/IP-ApoTome-04.czi	WT	42258397.17142857	71927	36684784	0.6646579682737126	0.5873161915729186	20180322
190	Zellen auf Kreuzpattern/WT/20180322/IP-ApoTome-13.czi	WT	33455514.15714286	84587	38392585	0.6592234411931367	0.5907310784176824	20180322
191	Zellen auf Kreuzpattern/WT/20180126/U2OS WT_19.czi	WT	23539755.433333334	107202	36192903	0.6124327744585727	0.5088521236464009	20180126
192	Zellen auf Kreuzpattern/WT/20180126/U2OS WT_2.czi	WT	16462822.75	86942	29378656	0.6596490322770381	0.5575741259209944	20180126
193	Zellen auf Kreuzpattern/WT/20180126/U2OS WT_18.czi	WT	20575370.82	71464	31266860	0.6492460707599036	0.5278393062132702	20180126
194	Zellen auf Kreuzpattern/WT/20180126/U2OS WT_3.czi	WT	23010438.285	105486	41027101	0.6668211336696688	0.5043702714277986	20180126
195	Zellen auf Kreuzpattern/WT/20180126/U2OS WT_13.czi	WT	19714398.886666667	86427	30065506	0.620256249803346	0.4883098261403915	20180126
196	Zellen auf Kreuzpattern/WT/20180126/U2OS WT_15.czi	WT	15108219.046666667	63672	24484269	0.6770896447837589	0.6136493171124424	20180126
197	Zellen auf Kreuzpattern/WT/20180126/U2OS WT_21.czi	WT	22072574.58	64135	30593214	0.6927116582128311	0.6564781162883673	20180126
198	Zellen auf Kreuzpattern/WT/20180126/U2OS WT_11.czi	WT	11952420.566666666	46217	18723061	0.5635047068425403	0.46584076500803534	20180126
199	Zellen auf Kreuzpattern/WT/20180126/U2OS WT_6.czi	WT	25790326.213333335	109226	36092049	0.6529179321462187	0.5413340195566672	20180126
200	Zellen auf Kreuzpattern/WT/20180126/U2OS WT_9.czi	WT	27675515.98666667	116545	37006530	0.6008079114685976	0.47978466918568313	20180126
201	Zellen auf Kreuzpattern/WT/20180126/U2OS WT_12.czi	WT	18377826.106666666	69493	26670348	0.6125434133817826	0.5720641887714821	20180126
202	Zellen auf Kreuzpattern/WT/20180126/U2OS WT_8.czi	WT	17368535.8	63220	25770332	0.6409877839369706	0.5395369943634102	20180126
203	Zellen auf Kreuzpattern/WT/20180126/U2OS WT_22.czi	WT	25484028.046666667	70537	42134136	0.6402706347176551	0.4943465109941936	20180126
204	Zellen auf Kreuzpattern/WT/20180126/U2OS WT_7.czi	WT	20609695.073333334	86527	30179090	0.618734229560931	0.4866583858559713	20180126
205	Zellen auf Kreuzpattern/WT/20180126/U2OS WT_17.czi	WT	18553996.626666665	69457	28787920	0.6642868258630703	0.5984968555131427	20180126
206	Zellen auf Kreuzpattern/WT/20180126/U2OS WT_4.czi	WT	21980866.53	82658	44606919	0.6544125138972274	0.5198891349907452	20180126
207	Zellen auf Kreuzpattern/WT/20180126/U2OS WT_20.czi	WT	25675593.933333334	64055	38089790	0.6709404278679405	0.5565815140544502	20180126
208	Zellen auf Kreuzpattern/WT/20180126/U2OS WT_1.czi	WT	25196662.48	82320	33182052	0.65678638560388	0.6052936291187482	20180126
209	Zellen auf Kreuzpattern/WT/20180126/U2OS WT_14.czi	WT	30852848.76	118350	41207267	0.6507690014967505	0.5435891021804508	20180126
210	Zellen auf Kreuzpattern/WT/20180126/U2OS WT_16.czi	WT	16411600.853333334	49378	25243473	0.6262325710887722	0.5230480715871418	20180126
211	Zellen auf Kreuzpattern/WT/20180126/U2OS WT_5.czi	WT	19048149.926666666	35281	31405168	0.5962609083957138	0.4950629668139758	20180126
212	Zellen auf Kreuzpattern/WT/20180126/U2OS WT_10.czi	WT	28253042.64	93132	40891435	0.5839719246830052	0.4764127249892236	20180126
213	Zellen auf Kreuzpattern/NMIIB-KO/20180313/IP-ApoTome-16.czi	NM IIB-KO	27300935.10909091	43834	30168342	0.7156712158725859	0.5874968491663014	20180313
214	Zellen auf Kreuzpattern/NMIIB-KO/20180313/IP-ApoTome-03.czi	NM IIB-KO	21328407.818181816	73058	20428204	0.7247841268865339	0.438645056722446	20180313
215	Zellen auf Kreuzpattern/NMIIB-KO/20180313/IP-ApoTome-17.czi	NM IIB-KO	33092036.71818182	73045	30361391	0.5654653964964912	0.5306228081260642	20180313
216	Zellen auf Kreuzpattern/NMIIB-KO/20180313/IP-ApoTome-11.czi	NM IIB-KO	24407393.618181817	63699	27072431	0.6995776626044407	0.5511445472086437	20180313
217	Zellen auf Kreuzpattern/NMIIB-KO/20180313/IP-ApoTome-07.czi	NM IIB-KO	22813032.072727274	70625	27288236	0.5656573770470176	0.3998376110207339	20180313
218	Zellen auf Kreuzpattern/NMIIB-KO/20180313/IP-ApoTome-10.czi	NM IIB-KO	30012206.454545453	22581	26976324	0.551127796359504	0.24583773513438886	20180313
219	Zellen auf Kreuzpattern/NMIIB-KO/20180313/IP-ApoTome-22.czi	NM IIB-KO	46289828.345454544	80101	40526462	0.5862826614373591	0.4169726625299602	20180313
220	Zellen auf Kreuzpattern/NMIIB-KO/20180313/IP-ApoTome-02.czi	NM IIB-KO	24751459.036363635	91944	25128728	0.6406081915487326	0.3875291575736835	20180313
221	Zellen auf Kreuzpattern/NMIIB-KO/20180313/IP-ApoTome-20.czi	NM IIB-KO	40483623.14545455	80114	38134036	0.6294497650340499	0.40000420072443843	20180313
222	Zellen auf Kreuzpattern/NMIIB-KO/20180313/IP-ApoTome-18.czi	NM IIB-KO	33746675.4	50651	31485360	0.6654382227168436	0.5175029918487637	20180313
223	Zellen auf Kreuzpattern/NMIIB-KO/20180313/IP-ApoTome-21.czi	NM IIB-KO	37439577.92727273	98958	34125154	0.6506789683645091	0.4436844372219703	20180313
224	Zellen auf Kreuzpattern/NMIIB-KO/20180313/IP-ApoTome-12.czi	NM IIB-KO	29666382.29090909	96550	27260804	0.6682844717272461	0.39429101969158903	20180313
225	Zellen auf Kreuzpattern/NMIIB-KO/20180313/IP-ApoTome-01.czi	NM IIB-KO	23647057.863636363	79021	25401035	0.7147490643589917	0.40509381755376056	20180313
226	Zellen auf Kreuzpattern/NMIIB-KO/20180313/IP-ApoTome-06.czi	NM IIB-KO	24120006.12727273	72982	24249380	0.6982569451260198	0.43995857108155373	20180313
227	Zellen auf Kreuzpattern/NMIIB-KO/20180313/IP-ApoTome-08.czi	NM IIB-KO	43386051.91818182	28342	40087698	0.6122901344946272	0.45163462469186194	20180313
228	Zellen auf Kreuzpattern/NMIIB-KO/20180313/IP-ApoTome-14.czi	NM IIB-KO	26715033.98181818	97539	28618688	0.6536529557190043	0.4085908490027165	20180313
229	Zellen auf Kreuzpattern/NMIIB-KO/20180313/IP-ApoTome-05.czi	NM IIB-KO	24428062.581818182	70373	25074372	0.7022488140480647	0.49333856426084194	20180313
230	Zellen auf Kreuzpattern/NMIIB-KO/20180313/IP-ApoTome-15.czi	NM IIB-KO	41865275.09090909	53197	37725858	0.6644578368502579	0.4125509567797949	20180313
231	Zellen auf Kreuzpattern/NMIIB-KO/20180313/IP-ApoTome-09.czi	NM IIB-KO	23503819.327272728	99047	21812146	0.6672432872950694	0.3837143631132471	20180313
232	Zellen auf Kreuzpattern/NMIIB-KO/20180313/IP-ApoTome-04.czi	NM IIB-KO	30690915.945454545	97046	27710130	0.6006504119612575	0.41584682859739575	20180313
233	Zellen auf Kreuzpattern/NMIIB-KO/20180322/IP-ApoTome-57.czi	NM IIB-KO	38626712.916666664	63877	26116417	0.677952722228321	0.489136326445027	20180322
234	Zellen auf Kreuzpattern/NMIIB-KO/20180322/IP-ApoTome-53.czi	NM IIB-KO	28827690.183333334	86468	20459963	0.7282170060620344	0.47383322347710005	20180322
235	Zellen auf Kreuzpattern/NMIIB-KO/20180322/IP-ApoTome-50.czi	NM IIB-KO	39783303.75	105053	32719649	0.6327740251736808	0.44179253413877145	20180322
236	Zellen auf Kreuzpattern/NMIIB-KO/20180322/IP-ApoTome-66.czi	NM IIB-KO	54362573.333333336	96214	35816601	0.7019878854501017	0.4901679554110583	20180322
237	Zellen auf Kreuzpattern/NMIIB-KO/20180322/IP-ApoTome-58.czi	NM IIB-KO	41299158.86666667	65012	31931154	0.7617482287047941	0.7299761802183043	20180322
238	Zellen auf Kreuzpattern/NMIIB-KO/20180322/IP-ApoTome-55.czi	NM IIB-KO	39222479.7	82264	27046616	0.6950471733691195	0.5193177122065952	20180322
239	Zellen auf Kreuzpattern/NMIIB-KO/20180322/IP-ApoTome-62.czi	NM IIB-KO	58138609.333333336	78238	42107111	0.661740816177106	0.5226601948230698	20180322
240	Zellen auf Kreuzpattern/NMIIB-KO/20180322/IP-ApoTome-72.czi	NM IIB-KO	46396083.45	81487	38571478	0.6755584009510862	0.5634657643178761	20180322
241	Zellen auf Kreuzpattern/NMIIB-KO/20180322/IP-ApoTome-54.czi	NM IIB-KO	37399548.56666667	81945	30380080	0.6570462618926612	0.4408411668255975	20180322
242	Zellen auf Kreuzpattern/NMIIB-KO/20180322/IP-ApoTome-52.czi	NM IIB-KO	49237039.2	70252	35055701	0.6434941922855857	0.4954233529445283	20180322
243	Zellen auf Kreuzpattern/NMIIB-KO/20180322/IP-ApoTome-59.czi	NM IIB-KO	70736128.0	87653	50500559	0.6570344696580487	0.5114765195066169	20180322
244	Zellen auf Kreuzpattern/NMIIB-KO/20180322/IP-ApoTome-68.czi	NM IIB-KO	67683515.8	86423	40471598	0.6394842625191128	0.5769636235905934	20180322
245	Zellen auf Kreuzpattern/NMIIB-KO/20180322/IP-ApoTome-71.czi	NM IIB-KO	39986315.266666666	107848	27132342	0.7058316602378077	0.44629375558552853	20180322
246	Zellen auf Kreuzpattern/NMIIB-KO/20180322/IP-ApoTome-69.czi	NM IIB-KO	53591057.2	88350	38647878	0.6286137624425331	0.4877855243512438	20180322
247	Zellen auf Kreuzpattern/NMIIB-KO/20180322/IP-ApoTome-70.czi	NM IIB-KO	55907174.15	85687	40931517	0.6602100283749561	0.583884545812049	20180322
248	Zellen auf Kreuzpattern/NMIIB-KO/20180322/IP-ApoTome-65.czi	NM IIB-KO	42514150.65	105053	33541789	0.6594410930198148	0.5022799797673312	20180322
249	Zellen auf Kreuzpattern/NMIIB-KO/20180322/IP-ApoTome-63.czi	NM IIB-KO	47090967.05	66589	31811384	0.6968842349015686	0.6236800633443856	20180322
250	Zellen auf Kreuzpattern/NMIIB-KO/20180322/IP-ApoTome-64.czi	NM IIB-KO	33534358.65	101289	23237884	0.656140034092605	0.3611805584937924	20180322
251	Zellen auf Kreuzpattern/NMIIB-KO/20180322/IP-ApoTome-61.czi	NM IIB-KO	47976851.28333333	82353	42205789	0.6465928169237637	0.5011276329616247	20180322
252	Zellen auf Kreuzpattern/NMIIB-KO/20180322/IP-ApoTome-67.czi	NM IIB-KO	48772632.85	107818	38345161	0.650364096789162	0.5812038294618789	20180322
253	Zellen auf Kreuzpattern/NMIIB-KO/20180322/IP-ApoTome-60.czi	NM IIB-KO	65559793.0	101008	42825162	0.7176204026969005	0.6044846782024101	20180322
254	Zellen auf Kreuzpattern/NMIIB-KO/20180322/IP-ApoTome-51.czi	NM IIB-KO	40130292.86666667	83736	29258031	0.7116864426044255	0.5623308470911751	20180322
255	Zellen auf Kreuzpattern/NMIIB-KO/20180322/IP-ApoTome-49.czi	NM IIB-KO	49065500.86666667	75744	35916257	0.6444735597030615	0.5135127574679802	20180322
256	Zellen auf Kreuzpattern/NMIIB-KO/20180126/NMIIB-KO_20.czi	NM IIB-KO	34455236.626666665	111671	43570144	0.676544332743082	0.6412919085103581	20180126
257	Zellen auf Kreuzpattern/NMIIB-KO/20180126/NMIIB-KO_1.czi	NM IIB-KO	21822876.96	87441	28129992	0.6751273160689132	0.5601194678012854	20180126
258	Zellen auf Kreuzpattern/NMIIB-KO/20180126/NMIIB-KO_22.czi	NM IIB-KO	25569735.2	89541	33928558	0.6782323021214164	0.6584904164955934	20180126
259	Zellen auf Kreuzpattern/NMIIB-KO/20180126/NMIIB-KO_17.czi	NM IIB-KO	33158635.58	87102	43225851	0.5475378610822491	0.4335714707994799	20180126
260	Zellen auf Kreuzpattern/NMIIB-KO/20180126/NMIIB-KO_19.czi	NM IIB-KO	25065005.88	82369	39713821	0.6195268896437842	0.5017422333672892	20180126
261	Zellen auf Kreuzpattern/NMIIB-KO/20180126/NMIIB-KO_13.czi	NM IIB-KO	20931800.626666665	107046	37933884	0.7033437440785131	0.6269687275059729	20180126
262	Zellen auf Kreuzpattern/NMIIB-KO/20180126/NMIIB-KO_11.czi	NM IIB-KO	25309339.64	81111	35175973	0.7005063370954941	0.5489103101482237	20180126
263	Zellen auf Kreuzpattern/NMIIB-KO/20180126/NMIIB-KO_6.czi	NM IIB-KO	24260529.886666667	68661	37839727	0.6241027584580618	0.5121657757498048	20180126
264	Zellen auf Kreuzpattern/NMIIB-KO/20180126/NMIIB-KO_2.czi	NM IIB-KO	19347669.253333334	60599	26403554	0.6259364174989474	0.5419689054239248	20180126
265	Zellen auf Kreuzpattern/NMIIB-KO/20180126/NMIIB-KO_14.czi	NM IIB-KO	32298799.213333335	109456	45249488	0.6241237911907423	0.5031581887266127	20180126
266	Zellen auf Kreuzpattern/NMIIB-KO/20180126/NMIIB-KO_4.czi	NM IIB-KO	28302593.126666665	87203	44992822	0.651562064722235	0.509925285884577	20180126
267	Zellen auf Kreuzpattern/NMIIB-KO/20180126/NMIIB-KO_5.czi	NM IIB-KO	18942726.606666666	86048	36065721	0.677151137502561	0.5123744120910294	20180126
268	Zellen auf Kreuzpattern/NMIIB-KO/20180126/NMIIB-KO_10.czi	NM IIB-KO	19610080.18	68054	34132772	0.6787036810253794	0.5200433705140213	20180126
269	Zellen auf Kreuzpattern/NMIIB-KO/20180126/NMIIB-KO_7.czi	NM IIB-KO	18101673.72	68275	32477777	0.6125368740600688	0.47871852964607003	20180126
270	Zellen auf Kreuzpattern/NMIIB-KO/20180126/NMIIB-KO_21.czi	NM IIB-KO	43885056.4	114345	61315238	0.5198948424533556	0.41459175427939204	20180126
271	Zellen auf Kreuzpattern/NMIIB-KO/20180126/NMIIB-KO_12.czi	NM IIB-KO	25679845.493333332	81540	33624266	0.5629173288124714	0.46274452641391844	20180126
272	Zellen auf Kreuzpattern/NMIIB-KO/20180126/NMIIB-KO_3.czi	NM IIB-KO	24610510.733333334	111034	31509716	0.689360767326497	0.4965659852548447	20180126
273	Zellen auf Kreuzpattern/NMIIB-KO/20180126/NMIIB-KO_23.czi	NM IIB-KO	18473904.93	67447	32280860	0.7096546994101148	0.5820253556033967	20180126
274	Zellen auf Kreuzpattern/NMIIB-KO/20180126/NMIIB-KO_9.czi	NM IIB-KO	23177889.106666666	83778	39227909	0.6643856036272543	0.5536305663325407	20180126
275	Zellen auf Kreuzpattern/NMIIB-KO/20180126/NMIIB-KO_25.czi	NM IIB-KO	27770212.07	82185	45357796	0.6009316237499723	0.43129711661186615	20180126
276	Zellen auf Kreuzpattern/NMIIB-KO/20180126/NMIIB-KO_16.czi	NM IIB-KO	25577989.76	83934	43404781	0.6403517621710844	0.48324572560996404	20180126
277	Zellen auf Kreuzpattern/NMIIB-KO/20180126/NMIIB-KO_8.czi	NM IIB-KO	21871153.56	105159	35770566	0.7163120091530003	0.5264117406723345	20180126
278	Zellen auf Kreuzpattern/NMIIB-KO/20180126/NMIIB-KO_15.czi	NM IIB-KO	27713704.086666666	97961	43212506	0.6453785392589821	0.49771073285847794	20180126
279	Zellen auf Kreuzpattern/NMIIB-KO/20180126/NMIIB-KO_18.czi	NM IIB-KO	29761607.52	86304	40149025	0.7308516707441837	0.6920105196558206	20180126
280	Zellen auf Kreuzpattern/NMIIB-KO/20180126/NMIIB-KO_24.czi	NM IIB-KO	21329700.06	80663	40054010	0.6906595369602194	0.5834671695024425	20180126

## Sheet: Tabelle1
		Actin coherency
		WT	NM IIA-KO	NM IIB-KO	NM IIC-KO
		0.673536	0.564847	0.715671	0.557383
		0.620067	0.591172	0.724784	0.639571
		0.611431	0.581473	0.565465	0.671736
		0.635587	0.58453	0.699578	0.641509
		0.692536	0.569635	0.565657	0.664846
		0.701938	0.525169	0.551128	0.629991
		0.62507	0.591628	0.586283	0.640318
		0.758802	0.562757	0.640608	0.59191
		0.629103	0.538904	0.62945	0.603359
		0.586288	0.628236	0.665438	0.652114
		0.609654	0.596917	0.650679	0.671427
		0.67118	0.509413	0.668284	0.654299
		0.580686	0.565884	0.714749	0.683299
		0.581283	0.603725	0.698257	0.596907
		0.703374	0.564827	0.61229	0.630121
		0.627603	0.577183	0.653653	0.568162
		0.595702	0.548256	0.702249	0.714817
		0.612132	0.595744	0.664458	0.625006
		0.640505	0.619875	0.667243	0.679887
		0.646679	0.536822	0.60065	0.685765
		0.647304	0.60351	0.677953	0.646357
		0.497281	0.576714	0.728217	0.657182
		0.687956	0.564233	0.632774	0.666246
		0.701872	0.566163	0.701988	0.620355
		0.65679	0.551312	0.761748	0.658994
		0.573301	0.550324	0.695047	0.665252
		0.732232	0.540453	0.661741	0.604393
		0.600851	0.558863	0.675558	0.666592
		0.596077	0.610382	0.657046	0.663181
		0.567183	0.584364	0.643494	0.655986
		0.676186	0.592843	0.657034	0.637468
		0.667165	0.594312	0.639484	0.664178
		0.605897	0.570166	0.705832	0.608465
		0.649392	0.582513	0.628614	0.706668
		0.591834	0.590465	0.66021	0.710404
		0.675592	0.586397	0.659441	0.667018
		0.654893	0.659282	0.696884	0.68753
		0.637763	0.628758	0.65614	0.660527
		0.635486	0.510481	0.646593	0.675373
		0.631344	0.560644	0.650364	0.650142
		0.655002	0.601805	0.71762	0.669195
		0.722934	0.583187	0.711686	0.652239
		0.664658	0.604346	0.644474	0.609984
		0.659223	0.561007	0.676544	0.645988
		0.612433	0.541664	0.675127	0.634801
		0.659649	0.598498	0.678232	0.64657
		0.649246	0.534524	0.547538	0.630274
		0.666821	0.589311	0.619527	0.678048
		0.620256	0.563156	0.703344	0.666115
		0.67709	0.497467	0.700506	0.626181
		0.692712	0.561215	0.624103	0.615505
		0.563505	0.586633	0.625936	0.593979
		0.652918	0.548232	0.624124	0.67931
		0.600808	0.573857	0.651562	0.673357
		0.612543	0.575465	0.677151	0.642001
		0.640988	0.55631	0.678704	0.646714
		0.640271	0.513762	0.612537	0.594781
		0.618734	0.631014	0.519895	0.580919
		0.664287	0.556029	0.562917	0.654806
		0.654413	0.538985	0.689361	0.632828
		0.67094	0.563595	0.709655	0.650202
		0.656786	0.584062	0.664386	0.606765
		0.650769	0.545273	0.600932
		0.626233	0.606588	0.640352
		0.596261	0.55437	0.716312
		0.583972	0.549537	0.645379
			0.56932	0.730852
			0.599031	0.69066
			0.593734
			0.568062
			0.639319
			0.632763
			0.597646
			0.574309
			0.571156
