# Supplementary material for: Distinct roles of nonmuscle myosin II isoforms for establishing tension and elasticity during cell morphodynamics
Source: eLife journal article supplement (doi:10.7554/elife.71888), 2021-08-10
Supplement: data1 [file Figure 3_figure supplement 4_source data.xlsx]

## Sheet: Tabelle1
NM IIA-KO + GFP-NM IIB			NM IIB-KO + GFP-NM IIA
arc radius [µm]	spanning distance [µm]		arc radius [µm]	spanning distance [µm]
73	25.93		45.405	22.66
52.83	21.75		59.075	43.55
99.82	21.99		85.54	35.19
22.115	19.2		56.615	27.06
22.575	17.36		32.2	30.27
26.57	18.35		22.52	30.18
40.49	25.13		13.36	15.83
8.6	7.92		13.105	15.97
43.51	20.93		47.555	32.51
49.06	40.1		42.54	28.55
55.08	31.7		24.825	22.28
101	33.71		45.05	26.7
14.795	7.55		78.425	31.58
17.61	6.87		74.945	32.95
100	39.48		73.46	30.48
28.205	22.3		43.565	26.18
26.72	27.5		72.075	20.86
26.515	17.19		100	30.15
32.045	20		93.83	25.7
38.395	17.07		70.24	16.97
38.41	16.85		25.185	20.92
22.935	20.03		28.205	26.18
79.245	32.94		32.61	27.34
12.8	11.61		26.245	23.84
38.955	17.48		58.41	28.67
86.92	44.41		42.13	32.4
42.845	13.49		46.02	28.77
100	26.44		46.94	25.54
55.13	19.9		66.75	25.47
55.13	16.24		70.44	30
39.21	30.47		94.61	35.24
25.7	20.49		17.97	13.21
27.03	19.03		59.485	18.93
41.415	28.67		98.54	27.05
34.35	23.32		62.505	24.36
37.42	16.55		51.19	8.68
80.93	34.63		45.56	25.55
57.23	42.98		53.29	27.29
38.34	28.22		42.18	25.98
66.395	32.66		36.425	22.34
21.195	15.43		28.925	24.5
76.225	37.34		16.995	14.36
78.22	38.4		29.74	24.17
52.575	27.17		36.96	27.24
34.04	29.13		39.06	18.75
53.75	20.51		8.19	8.22
85.795	22.88		24.725	15.45
29.33	30.03		31.635	25.48
82.265	38.19		42.59	19.78
60.045	34.55		26.465	14.29
50.575	36.1		41.465	16.99
17.355	15.6		30.97	22.46
44.945	31.15		26.825	22.18
17.455	16.55		27.13	21.56
25.9	19.32		29.795	23.53
20.325	21.93		33.785	26.19
25.595	19.49		12.13	11.81
57.025	29.39		17.15	12.16
15.97	15.54		16.38	12.52
45.1	32.02		15.1	8.86
41.105	35.21		22.065	24
47.555	36.93		22.165	21.02
27.49	23.86		15	11.76
19.81	14.74		60.61	21.27
43.205	31.3		21.755	13.43
49.96	29.48		17.405	8.12
18.07	20.84		62.76	17.22
30.255	28.87		45.305	19.12
71.31	39.27		46.175	17.58
15.15	20.1		19.35	9.2
17.3	14.59		45.2	13.24
19.045	16.45		46.02	16.95
17.15	19.8		55.335	17.25
12.49	12.26		15.355	6.92
12.8	11.53		26.515	23.58
34.4	20.66		23.55	20.95
18.43	18.96		61.94	32.88
25.645	25.9		37.265	33.04
15.05	14.77		14.23	14.23
27.235	23.06		35.015	20.17
30	32.63		34.4	17.67
27.695	20.89		25.7	13.95
23.14	21.6		21.14	22.9
24.57	24.02		18.635	18.63
48.275	34.3		18.325	19.21
45.56	23.32		24.625	27.24
53.035	26.89		21.96	27.78
43.565	36.09		18.58	21.73
20.73	27.53		28.77	25.81
23.495	24.3		41.77	33.12
19.555	26.26		14.845	12.16
23.805	30.52		14.895	13.51
54.725	35.46		85.08	28.46
12.13	7.68		41.155	25.13
56.41	25.89		29.485	15.58
52.215	21.07		40.85	15.16
32.2	24.26		62.505	17.46
49.86	25.47		53.545	15.77
17.355	10.8		47.505	40.44
31.43	31.52		39.315	27.85
26.365	27.94		20.63	20.95
14.435	13.65		44.28	39.2
24.98	18.9		46.38	26.52
44.23	29.02		98.575	22.2
68.955	23.26		79.585	26.7
43	17.2		35.17	29.37
23.19	19.77		67.01	33.06
47.095	37.61		18.94	16.58
63.375	27.17		33.12	20.32
16.945	14.82		41.465	38.79
58.92	33.92		24.675	20.09
33.425	22.98		29.795	12.44
29.125	6.95		56.465	22.69
15.665	7.5		58	29.54
32.71	13.85		31.945	25.92
50.165	41.86		38.085	24.1
58.92	35.42		40.235	30.93
53.955	24.8		40.95	33.67
51.855	34.34		47.825	25.42
76.425	37.86		41.005	20.63
55.235	23.23		49.705	23.4
21.86	9.41		54.055	29.7
34.965	22.57
87.23	29.67
53.24	22.55
33.58	18.82
45.455	25.01
30.305	32.98
28.515	22.9
15	15.18
15.665	18.29
62.195	34.58
58.205	33.29
35.68	26.35
54.19	29.4
38.75	30.65
40.135	24.76
28.36	14.24
47.4	25.53
44.585	33.24
36.805	24.78
25.595	14.06
52.675	25.07
51.65	38.64
29.385	31.22
20.27	21.9
34.81	28.43
34.605	24.89
33.735	19.46
45.66	19.66
49.145	19.08
43.155	36.51
51.24	33.52
38.65	22.62
49.45	31.27
39.47	30.33
43.155	32.42
26.31	21.35
22.115	16.38
