# Supplementary material for: Distinct roles of nonmuscle myosin II isoforms for establishing tension and elasticity during cell morphodynamics
Source: eLife journal article supplement (doi:10.7554/elife.71888), 2021-08-10
Supplement: data1 [file Figure 4_figure supplement 1_source data.xlsx]

## Sheet: flow rate
WT_NM IIA-GFP_Homogenous_1							NM IIA-GFP_FN-Cy3_2_Pattern
Height [cm]	Width [cm]	time in min [3,26 cm = 60 min]	Distance [17,2 µm]	Flowrate [µm/min]	Flowrate [nm/min]		Height [cm]	Width [cm]	time in min [4,99 um = 60 min]	Distance [26,23 µm]	Flowrate [µm/min]	Flowrate [nm/min]
1.29	1.4	23.7423	1.74493	0.0734944	73.4944		1.78	0.88	21.4028	1.67264	0.0781504	78.1504
2.25	1.82	41.411	2.26841	0.0547778	54.7778		2.18	1.43	26.2124	2.71804	0.103693	103.693
2.49	2.86	45.8282	3.56464	0.0777826	77.7826		2.14	1.3	25.7315	2.47094	0.096028	96.028
0.73	1.17	13.4356	1.45826	0.108537	108.537		1.47	0.61	17.6754	1.15944	0.0655966	65.5966
0.68	1.49	12.5153	1.8571	0.148386	148.386		0.85	0.52	10.2204	0.988377	0.0967059	96.7059
1.16	1.69	21.3497	2.10638	0.0986608	98.6608		3.78	1.72	45.4509	3.26925	0.0719292	71.9292
0.78	0.98	14.3558	1.22145	0.0850839	85.0839		1.72	1.08	20.6814	2.05278	0.0992576	99.2576
1.11	2.21	20.4294	2.75449	0.13483	134.83		2.97	1.95	35.7114	3.70641	0.103788	103.788
1.21	1.79	22.2699	2.23101	0.100181	100.181		3.52	2.25	42.3246	4.27663	0.101043	101.043
0.77	0.89	14.1718	1.10928	0.0782735	78.2735		3.46	1.77	41.6032	3.36428	0.0808659	80.8659
1.44	2.11	26.5031	2.62986	0.0992283	99.2283		2.29	1.12	27.5351	2.12881	0.0773127	77.3127
1.54	1.49	28.3436	1.8571	0.0655211	65.5211		2.99	1.37	35.9519	2.60399	0.0724299	72.4299
0.65	1.02	11.9632	1.2713	0.106268	106.268		3.45	1.42	41.483	2.69903	0.0650635	65.0635
2.31	2.01	42.5153	2.50522	0.058925	58.925		2.57	1.37	30.9018	2.60399	0.0842667	84.2667
3.2	3.15	58.8957	3.92609	0.0666617	66.6617		2.32	1.27	27.8958	2.41392	0.0865335	86.5335
2.09	1.76	38.4663	2.19362	0.0570272	57.0272		2.96	1.06	35.5912	2.01477	0.0566086	56.6086
				MW	88.3524		2.53	1.13	30.4208	2.14782	0.0706035	70.6035
				STABW	26.5377		2.57	1.3	30.9018	2.47094	0.0799611	79.9611
							2.15	1.04	25.8517	1.97675	0.0764651	76.4651
WT_NM IIA-GFP_2_Homogenous_reslice 1							2.04	1.26	24.5291	2.39491	0.0976358	97.6358
Height [cm]	Width [cm]	time in min [3,28 cm = 30 min]	Distance [12,69 µm]	Flowrate [µm/min]	Flowrate [nm/min]		2.15	0.96	25.8517	1.8247	0.0705832	70.5832
1.35	1.88	12.3476	0.740447	0.0599671	59.9671		1.07	0.56	12.8657	1.06441	0.0827319	82.7319
1.2	2.43	10.9756	0.957067	0.0871994	87.1994		1.34	0.55	16.1122	1.0454	0.0648823	64.8823
1.19	2.27	10.8841	0.89405	0.0821424	82.1424
2.84	5.53	25.9756	2.17802	0.0838485	83.8485
2.19	2.46	20.0305	0.968883	0.0483704	48.3704
1.4	2.22	12.8049	0.874358	0.0682832	68.2832
0.98	1.38	8.96341	0.54352	0.0606376	60.6376		NM IIA-GFP_1_Pattern_1
1.27	1.25	11.6159	0.492318	0.0423833	42.3833		Height [cm]	Width [cm]	time in min [2,58 um = 60 min]	Distance [11,48 µm]	Flowrate [µm/min]	Flowrate [nm/min]
2.5	2.38	22.8659	0.937374	0.0409945	40.9945		0.6	1.25	13.9535		0.0895833	89.5833
2.08	2.42	19.0244	0.953128	0.0501003	50.1003		0.6	1.03	13.9535		0.0738167	73.8167
2.29	3.99	20.9451	1.57148	0.0750285	75.0285		0.69	1.08	16.0465		0.0673043	67.3043
				MW	63.5414		0.43	0.69	10		0.069	69
				STABW	16.1261		0.17	0.3	3.95349		0.0758824	75.8824
							0.34	0.56	7.90698		0.0708235	70.8235
WT_NM IIA-GFP_1_Homogenous_reslice 1
Height [cm]	Width [cm]	time in min [5,82 cm = 60 min]	Distance [15 µm]	Flowrate [µm/min]	Flowrate [nm/min]
0.82	3.34	8.45361	1.47919	0.174977	174.977
2.08	3.12	21.4433	1.38175	0.0644376	64.4376		NM IIA-GFP_1_Pattern_2
1.11	2.37	11.4433	1.0496	0.0917219	91.7219		Height [cm]	Width [cm]	time in min [2,58 um = 60 min]	Distance [10,54 µm]	Flowrate [µm/min]	Flowrate [nm/min]
1.5	2.61	15.4639	1.15589	0.0747476	74.7476		0.39	0.6	9.06977		0.0661538	66.1538
1.61	1.98	16.5979	0.876882	0.0528308	52.8308		0.26	0.5	6.04651		0.0826923	82.6923
1.78	1.74	18.3505	0.770593	0.041993	41.993		0.73	0.99	16.9767		0.0583151	58.3151
2.52	3.81	25.9794	1.68733	0.064949	64.949		0.69	0.83	16.0465		0.0517246	51.7246
2.24	2.92	23.0928	1.29318	0.0559993	55.9993
1.58	1.91	16.2887	0.845881	0.0519307	51.9307
				MW	74.843
				STABW	37.9496
							NM IIA-GFP_1_Pattern_3
							Height [cm]	Width [cm]	time in min [2,58 um = 60 min]	Distance [9,07 µm]	Flowrate [µm/min]	Flowrate [nm/min]
WT_NM IIA-GFP_reslice 2							0.73	1.29	16.9767		0.0759863	75.9863
Height [cm]	Width [cm]	time in min [1,09 um = 26 min]	Distance [13,10 µm]	Flowrate [µm/min]	Flowrate [nm/min]		0.6	0.95	13.9535		0.0680833	68.0833
0.59	1.01	14.0734		0.0717666	71.7666		0.73	0.99	16.9767		0.0583151	58.3151
0.42	0.59	10.0183		0.0588919	58.8919		0.69	0.83	16.0465		0.0517246	51.7246
0.29	0.5	6.91743		0.0722812	72.2812		0.47	1.16	10.9302		0.106128	106.128
0.38	0.84	9.06422		0.0926721	92.6721		0.43	1.12	10		0.112	112
0.59	1.05	14.0734		0.0746089	74.6089		0.26	0.65	6.04651		0.1075	107.5
0.63	1.01	15.0275		0.06721	67.21
0.42	0.67	10.0183		0.0668773	66.8773
				MW	72.044
				STABW	9.67521
							NM IIA-GFP_2_Pattern_1
							Height [cm]	Width [cm]	time in min	Distance [19,69 µm]	Flowrate [µm/min]	Flowrate [nm/min]
WT_NM IIA-GFP_reslice 3							0.47	0.9	10.9262		0.0823708	82.3708
Height [cm]	Width [cm]	time in min [1,05 um = 25 min]	Distance [16,40 µm]	Flowrate [µm/min]	Flowrate [nm/min]		0.43	0.9	9.99631		0.0900332	90.0332
0.29	0.67	6.90476		0.0970345	97.0345		0.3	0.6	6.97417		0.0860317	86.0317
0.25	0.55	5.95238		0.0924	92.4		0.82	1.29	19.0627		0.0676713	67.6713
0.34	0.55	8.09524		0.0679412	67.9412		0.43	0.77	9.99631		0.0770284	77.0284
0.29	0.88	6.90476		0.127448	127.448		0.65	1.12	15.1107		0.0741197	74.1197
0.13	0.45	3.09524		0.145385	145.385
0.38	0.55	9.04762		0.0607895	60.7895
				MW	98.4997
				STABW	30.0872
							NM IIA-GFP_2_Pattern_2
							Height [cm]	Width [cm]	time in min [2,71 um = 63 min]	Distance [13,16 µm]	Flowrate [µm/min]	Flowrate [nm/min]
NM IIA-GFP_2_reslice							0.69	1.03	16.0406		0.0642121	64.2121
Height [cm]	Width [cm]	time in min [2,67 um = 62 min]	Distance [16,40 µm]	Flowrate [µm/min]	Flowrate [nm/min]		0.77	1.51	17.9004		0.0843558	84.3558
1.2	2.41	27.8652		0.0864879	86.4879		0.69	1.33	16.0406		0.0829147	82.9147
1.2	2.24	27.8652		0.0803871	80.3871		0.82	1.76	19.0627		0.0923268	92.3268
1.33	2.11	30.8839		0.0683204	68.3204		0.69	1.25	16.0406		0.0779273	77.9273
1.25	2.62	29.0262		0.0902632	90.2632		0.47	0.95	10.9262		0.086947	86.947
1.68	3.53	39.0112		0.0904868	90.4868
1.2	1.81	27.8652		0.0649556	64.9556
				MW	80.1502
				STABW	10.1666
							NM IIA-GFP_2_Pattern_3
							Height [cm]	Width [cm]	time in min [2,71 um = 63 min]	Distance [12,94 µm]	Flowrate [µm/min]	Flowrate [nm/min]
							0.73	1.46	16.9705		0.0860317	86.0317
							0.69	0.95	16.0406		0.0592248	59.2248
							0.65	1.2	15.1107		0.0794139	79.4139
							0.52	0.82	12.0886		0.0678327	67.8327
							0.39	0.6	9.06642		0.0661783	66.1783
							0.3	0.73	6.97417		0.104672	104.672
