# Supplementary material for: Distinct roles of nonmuscle myosin II isoforms for establishing tension and elasticity during cell morphodynamics
Source: eLife journal article supplement (doi:10.7554/elife.71888), 2021-08-10
Supplement: data1 [file Figure 5A and Figure 5_figure supplement 1_source data.xlsx]

## Sheet: Tabelle1
WT								NM IIA-KO								NM IIB-KO								NM IIC-KO
Time	Reference	Top	Right	Bottom	Left	Average		Time	Reference	Top	Right	Bottom	Left	Average		Time	Reference	Top	Right	Bottom	Left	Average		Time	Reference	Top	Right	Bottom	Left	Average
1.20583	0	0	0	0	0	0		1.22217	0	0	0	0	0	0		0.61842	0	0	0	0	0	0		0.5417	0	0	0	0	0	0
2.41167	-0.000167299	-0.02958	0.01293	3.33633e-05	-0.05428	-0.01772		2.44433	-0.00256	0.03303	-0.01873	-0.03232	-0.000240694	-0.00457		1.23683	9.46521e-05	-0.05901	0.02695	-0.00511	0.00128	-0.00897		1.0834	1.98513e-06	0.01635	0.01144	0.03119	0.05318	0.02804
3.6175	9.84275e-05	-0.06089	-0.02634	-0.01005	-0.00463	-0.02548		3.6665	-0.00197	0.0571	-0.02251	-0.03656	0.0309	0.00723		1.85525	-8.44415e-05	-0.04604	0.07009	-0.0116	0.02429	0.00919		1.6251	9.81377e-07	-0.01125	0.01666	0.09714	0.04367	0.03656
4.82333	-0.000121145	-0.03747	-0.03506	0.000368398	0.03503	-0.00928		4.88867	-0.000724786	0.07392	0.00839	-0.08208	0.02163	0.00547		2.47367	5.53048e-06	-0.01483	0.06051	-0.0142	0.0312	0.01567		2.1668	7.14744e-07	0.06457	0.0632	0.0668	0.03125	0.05645
6.02917	-0.00010108	-0.03477	-0.0164	0.00902	0.02514	-0.00425		6.11083	-0.000234026	0.04578	0.01017	-0.04969	0.00954	0.00395		3.09208	-4.61155e-05	0.06827	0.01778	0.07181	0.00885	0.04168		2.7085	6.77967e-05	0.01929	0.05016	0.01224	0.02435	0.02651
7.235	3.73318e-05	-0.0783	-0.04865	-0.01186	0.03685	-0.02549		7.333	0.00213	0.08182	0.04257	-0.06785	-0.02769	0.00721		3.7105	4.3004e-05	-0.00582	0.00159	-0.00356	-0.00168	-0.00237		3.2502	3.81316e-05	-0.008	0.06462	0.03767	0.04604	0.03508
8.44083	5.71257e-06	-0.09952	-0.05549	-0.06568	-0.04794	-0.06715		8.55517	0.00051299	0.09647	0.00991	-0.08108	0.01989	0.0113		4.32892	3.75256e-06	-0.05198	-0.03183	-0.02435	0.01136	-0.0242		3.7919	1.2516e-06	-0.00666	0.06496	0.0508	0.02987	0.03474
9.64667	-3.22996e-05	-0.1419	-0.10697	-0.06143	-0.06733	-0.09441		9.77733	0.00128	0.05507	0.003	-0.06233	0.01083	0.00164		4.94733	8.4263e-05	-0.06944	-0.05951	-0.03996	0.02117	-0.03693		4.3336	3.71983e-05	-0.06584	0.03976	0.06656	0.03497	0.01886
10.8525	-8.32599e-05	-0.09491	-0.0889	-0.09086	-0.0444	-0.07977		10.9995	0.000457018	0.03833	0.01771	-0.03413	0.00875	0.00767		5.56575	5.71705e-05	-0.05684	-0.10817	-0.0632	0.05146	-0.04419		4.8753	7.04466e-05	-0.07051	0.0294	0.08881	0.0479	0.0239
12.0583	-0.000125174	-0.09466	-0.04945	0.03242	-0.02201	-0.03342		12.2217	-0.000464493	-0.01398	0.01781	0.02779	-0.00384	0.00694		6.18417	1.73412e-06	0.0566	-0.10401	-0.17519	0.05961	-0.04075		5.417	-2.98694e-05	-0.05861	0.0256	0.09316	0.06803	0.03204
13.2642	-2.72998e-05	-0.11042	-0.02825	0.03725	-0.02344	-0.03121		13.4438	0.000408639	0.01458	0.0544	0.00176	-0.01622	0.01363		6.80258	-1.24836e-06	0.04674	-0.07199	-0.15868	0.02746	-0.03912		5.9587	-3.19884e-05	-0.05326	0.03924	0.08879	0.05685	0.0329
14.47	3.42787e-05	-0.06794	-0.04772	0.00579	-0.08065	-0.04763		14.666	0.000297475	0.01246	0.03979	0.01626	0.00755	0.01901		7.421	3.8675e-05	-0.02817	-0.05684	-0.01716	0.04603	-0.01404		6.5004	-6.7656e-05	-0.06263	0.0485	0.10508	0.04801	0.03474
15.6758	7.16611e-06	-0.13783	0.01685	0.02405	-0.09106	-0.047		15.8882	0.00017513	0.02898	0.03649	0.00191	0.01065	0.01951		8.03942	-3.81666e-05	-0.07187	-0.06641	-0.02889	0.04447	-0.03068		7.0421	3.52232e-05	-0.04786	0.02519	0.09418	0.03295	0.02611
16.8817	-1.13396e-05	-0.07393	0.02018	-0.03928	-0.05707	-0.03753		17.1103	0.000606943	0.02835	0.03607	-0.01049	0.00879	0.01568		8.65783	8.96269e-05	-0.08571	-0.02219	-0.0209	-0.00543	-0.03356		7.5838	-2.679e-05	-0.05743	0.02299	0.14761	0.04866	0.04045
18.0875	-0.000197671	-0.11986	0.015	-0.02729	-0.05795	-0.04753		18.3325	0.000158555	0.04738	0.02727	-0.03645	0.01971	0.01448		9.27625	4.82122e-05	-0.1702	-0.10156	0.06435	0.06291	-0.03613		8.1255	-3.09656e-05	-0.05275	-0.000807888	0.16888	0.09729	0.05315
19.2933	-2.43164e-05	-0.0981	-0.000616817	-0.064	-0.05759	-0.05508		19.5547	0.00014706	0.06548	0.01261	-0.05485	0.02991	0.01329		9.89467	3.84265e-05	-0.15347	-0.119	0.069	0.07364	-0.03246		8.6672	-3.01327e-05	-0.02672	0.00552	0.15726	0.08128	0.05434
20.4992	0.000278339	-0.0974	-0.02484	0.06508	0.02721	-0.00749		20.7768	-0.000200691	0.04396	-0.00195	-0.03312	-0.00109	0.00195		10.5131	3.72408e-06	-0.08708	-0.10884	-0.01924	0.09144	-0.03093		9.2089	-3.297e-05	-0.02767	0.03173	0.13479	0.03545	0.04357
21.705	7.40704e-05	-0.08757	0.01451	0.07312	0.02204	0.00552		21.999	0.00362	0.03257	-0.03279	-0.02335	0.01577	-0.00195		11.1315	1.09494e-05	-0.08091	-0.14448	-0.03949	0.09234	-0.04313		9.7506	6.77967e-05	-0.04413	0.04271	0.117	-0.00881	0.02669
22.9108	-9.13419e-05	-0.087	0.09955	0.11239	-0.0253	0.02491		23.2212	-0.000306449	0.04689	-0.00821	-0.03847	-0.02829	-0.00702		11.7499	9.02647e-05	-0.04908	-0.11942	-0.05509	0.07766	-0.03648		10.2923	1.69612e-06	-0.05568	0.03632	0.08347	-0.041	0.00578
24.1167	3.45624e-05	-0.03631	0.05735	0.09423	0.07836	0.04841		24.4433	-0.00076014	0.05845	-0.02209	-0.0536	-0.01916	-0.0091		12.3683	5.81035e-05	-0.04592	-0.11918	-0.0604	0.08598	-0.03488		10.834	-3.38335e-05	-0.06942	0.02333	0.11046	-0.02752	0.00921
25.3225	4.32338e-05	-0.04351	-0.01926	0.09182	0.12978	0.03971		25.6655	-7.50762e-05	0.05904	-0.01777	-0.0128	-0.04371	-0.00381		12.9868	-3.17974e-06	-0.04988	-0.07849	-0.06207	0.05404	-0.0341		11.3757	-3.20617e-05	-0.05831	0.05086	0.12513	-0.00538	0.02807
26.5283	0.000169858	-0.04947	0.03538	0.09053	0.03332	0.02744		26.8877	-0.00119	0.0408	0.00375	-0.00651	-0.07506	-0.00925		13.6052	0.0001301	-0.04896	-0.04855	-0.06287	0.04848	-0.02797		11.9174	-6.13977e-05	-0.02224	0.07359	0.12091	0.03307	0.05133
27.7342	0.00053935	-0.03523	-0.09658	0.04973	0.05708	-0.00625		28.1098	0.000435048	0.06544	-0.01566	-0.0343	-0.08411	-0.01716		14.2236	8.63071e-05	-0.05958	-0.0395	-0.05112	0.0557	-0.02363		12.4591	-2.3473e-05	-0.00171	0.07112	0.13475	0.04085	0.06125
28.94	3.576e-05	-0.03524	-0.08742	0.0461	0.05313	-0.00586		29.332	-0.000132	0.07547	0.00111	-0.05895	-0.1727	-0.03877		14.842	1.84205e-06	-0.00483	0.03834	0.0399	0.04841	0.03045		13.0008	6.13072e-06	0.0345	0.10304	0.15098	0.028	0.07913
30.1458	1.74821e-05	-0.04118	-0.08762	0.00403	0.01507	-0.02742		30.5542	0.00045816	0.06757	-0.01205	-0.03017	-0.127	-0.02541		15.4604	2.17856e-06	-0.04964	0.03481	-0.01546	0.01136	-0.00473		13.5425	-6.05703e-05	0.05743	0.11144	0.17699	0.0418	0.09691
31.3517	0.000539319	-0.07155	-0.07354	0.04591	0.02123	-0.01949		31.7763	-0.000555903	0.04361	-0.01793	0.00536	-0.11846	-0.02186		16.0788	8.08442e-05	-0.03426	0.01502	-0.02633	0.0348	-0.00269		14.0842	-6.50096e-05	0.07435	0.15415	0.17258	0.0114	0.10312
32.5575	0.000638796	-0.06876	-0.07255	0.0718	0.05424	-0.00382		32.9985	0.000986447	0.03499	-0.00836	-0.00689	-0.12385	-0.02603		16.6973	8.5199e-05	-0.04662	0.00995	-0.02803	0.05033	-0.00359		14.6259	-6.55318e-05	0.07922	0.1515	0.15618	0.03324	0.10503
33.7633	0.000529582	-0.08369	-0.06279	0.07887	0.00169	-0.01648		34.2207	0.00090666	0.04129	0.000596464	-0.00855	-0.11838	-0.02126		17.3157	0.000103847	-0.03242	0.02795	-0.0258	0.06061	0.00758		15.1676	-6.27902e-05	0.10575	0.11321	0.13407	0.05531	0.10208
34.9692	0.00062335	-0.10854	-0.10721	0.11221	0.09695	-0.00165		35.4428	0.00195	0.0291	-0.00536	-0.00429	-0.09361	-0.01854		17.9341	0.000128156	-0.01931	0.04061	-0.01487	0.02862	0.00876		15.7093	3.70774e-05	0.10049	0.10995	0.1392	0.03814	0.09695
36.175	0.000344337	-0.07323	-0.03555	0.10113	0.05595	0.01207		36.665	0.00105	0.0358	0.0102	-0.00485	-0.04698	-0.00146		18.5525	3.32536e-05	0.09497	0.08642	0.08623	0.01238	0.07		16.251	-3.39514e-05	0.08549	0.13423	0.18015	0.05061	0.11262
37.3808	0.000126367	-0.04553	-0.03567	0.08625	0.03705	0.01053		37.8872	0.00242	0.05973	-0.0212	-0.03379	-0.00575	-0.000251848		19.1709	-7.65827e-06	0.08127	0.05945	0.0961	0.05876	0.0739		16.7927	-9.57378e-05	0.141	0.15653	0.23072	0.10712	0.15884
38.5867	0.000264895	-0.03673	-0.03713	0.03752	-0.06068	-0.02425		39.1093	0.00132	0.05486	-0.02515	-0.02173	-0.05174	-0.01094		19.7893	0.000137996	0.09625	0.09171	0.0816	0.06462	0.08354		17.3344	1.69612e-06	0.15305	0.16027	0.24292	0.14262	0.17472
39.7925	0.000309192	-0.04805	-0.07441	0.01288	-0.02614	-0.03393		40.3315	0.000799033	0.04392	0.00939	-0.01333	-0.0016	0.0096		20.4078	0.000145356	0.11166	0.08787	0.07323	0.09617	0.09223		17.8761	-6.76359e-05	0.1054	0.14025	0.21319	0.10843	0.14182
40.9983	0.000351569	-0.07983	-0.10734	0.04587	0.00571	-0.0339		41.5537	0.00019222	0.08065	-0.01688	-0.0476	0.04128	0.01436		21.0262	4.00236e-05	0.08654	0.07625	0.06603	0.05411	0.07073		18.4178	2.41099e-06	0.05459	0.08589	0.17056	0.07386	0.09623
42.2042	0.000252148	-0.03364	-0.03187	0.03219	-0.011	-0.01108		42.7758	0.000557931	0.08571	-0.04361	-0.06237	0.06555	0.01132		21.6446	0.000193974	0.05591	0.03077	0.07633	0.04239	0.05135		18.9595	-6.27902e-05	0.04574	0.07677	0.1285	0.09247	0.08587
43.41	-8.7934e-05	-0.04297	-0.02795	0.04347	-0.00244	-0.00747		43.998	0.00131	0.08066	-0.01845	-0.05121	0.05927	0.01757		22.263	0.000119276	-0.01343	0.03521	-0.01292	-0.01299	-0.00103		19.5012	-6.50096e-05	0.06184	0.08798	0.08042	0.13663	0.09172
44.6158	0.000238496	-0.06117	-0.04096	0.07322	0.03502	0.00153		45.2202	0.000897655	0.07477	-0.01033	-0.03632	0.04537	0.01837		22.8814	0.000148108	-0.03708	0.0176	-0.05423	0.01097	-0.01568		20.0429	-6.82096e-05	0.06389	0.11262	0.10756	0.1511	0.10879
45.8217	0.000330882	-0.02686	-0.08208	0.03525	0.05026	-0.00586		46.4423	-0.000967394	0.06355	-0.00371	-0.01668	0.0364	0.01989		23.4998	8.45115e-05	-0.04376	0.04769	-0.04558	0.02227	-0.00484		20.5846	-6.62467e-05	0.06291	0.10529	0.14608	0.16241	0.11917
47.0275	0.000133516	-0.00696	-0.03413	0.0242	0.03984	0.00574		47.6645	0.00148	0.0634	-0.01023	-0.0275	0.03945	0.01628		24.1182	6.47641e-06	-0.04486	0.07756	-0.03124	0.0391	0.01014		21.1263	1.98295e-06	0.08917	0.10091	0.19667	0.18473	0.14287
48.2333	2.16703e-05	0.06472	-0.000194369	-0.05611	0.00497	0.00335		48.8867	-0.00441	0.06964	-0.03265	-0.03122	0.000273654	0.00151		24.7367	4.11583e-05	0.00558	0.03669	-0.0298	0.02865	0.01028		21.668	-3.09924e-05	0.16004	0.11478	0.19092	0.16061	0.15659
49.4392	-1.80083e-05	0.03173	0.04483	-0.02247	-0.02803	0.00651		50.1088	-8.01806e-05	0.05248	0.02287	-0.00195	-0.09277	-0.00484		25.3551	-3.69148e-05	0.0337	0.03815	-0.06091	-0.00516	0.00145		22.2097	3.47063e-05	0.1714	0.10541	0.15285	0.13922	0.14222
50.645	0.000341934	0.03319	0.04987	0.02834	-0.00797	0.02585		51.331	-8.01806e-05	0.03374	0.00167	0.00467	-0.01518	0.00622		25.9735	1.10988e-05	-0.01035	0.03155	-0.07287	-0.02708	-0.01969		22.7514	1.42961e-06	0.14497	0.12557	0.1931	0.13668	0.15008
51.8508	0.000151464	0.06991	0.04769	-0.0128	-0.01092	0.02347		52.5532	-8.01806e-05	0.04243	0.02063	0.008	-0.03592	0.00878		26.5919	5.71335e-05	-0.02118	0.02871	-0.08468	-0.06275	-0.03497		23.2931	-6.27902e-05	0.14675	0.18114	0.21681	0.11755	0.16556
53.0567	2.7253e-05	0.04763	0.05175	-0.000792061	-0.02506	0.01838		53.7753	-8.01806e-05	0.03539	0.01709	-0.00191	-0.00428	0.01157		27.2103	1.06733e-05	0.05093	0.02917	-0.15579	-0.03885	-0.02863		23.8348	-6.05703e-05	0.16264	0.18135	0.22884	0.14847	0.18033
54.2625	-7.47368e-05	0.03254	0.04618	-0.03777	-0.02059	0.00509		54.9975	-8.01806e-05	0.04273	0.03279	0.00508	-0.03583	0.01119		27.8287	-4.59953e-05	0.02926	0.04415	-0.07031	-0.02874	-0.00641		24.3765	-6.13764e-05	0.20456	0.14015	0.20316	0.18368	0.18289
55.4683	0.000414084	0.0288	-0.00235	-0.01886	-0.00442	0.000793668		56.2197	-8.01806e-05	0.05698	0.03296	-0.00196	-0.09651	-0.00213		28.4472	5.28411e-05	-0.06236	0.000763709	-0.0313	0.02183	-0.01777		24.9182	-2.56934e-05	0.17302	0.13694	0.22193	0.17451	0.1766
56.6742	0.000304538	0.03115	-0.02845	-0.00137	0.03357	0.00873		57.4418	-8.01806e-05	0.05009	0.02467	0.00696	-0.02993	0.01295		29.0656	9.11995e-06	0.000410525	0.02352	-7.51692e-05	0.02723	0.01277		25.4599	7.25402e-06	0.17043	0.13541	0.25244	0.14313	0.17535
57.88	0.000257601	0.08294	0.00335	0.01643	0.04097	0.03592		58.664	-8.01806e-05	0.0601	0.02916	-0.02246	-0.01525	0.01289		29.684	5.53668e-05	0.04895	-0.01475	0.06836	0.05874	0.04032		26.0016	-6.27634e-05	0.16641	0.13683	0.21785	0.11788	0.15974
59.0858	0.00060311	-0.03431	-0.06112	0.03977	0.06545	0.00245		59.8862	-8.01806e-05	0.05102	0.01168	-0.02313	-0.02537	0.00355		30.3024	4.87668e-05	-0.02144	-0.000615501	-0.03326	-0.03007	-0.02135		26.5433	-9.54204e-05	0.16994	0.14629	0.19999	0.10615	0.15559
60.2917	0.000314065	-0.03639	-0.10798	0.06642	0.15288	0.01873		61.1083	-8.01806e-05	0.04055	0.0056	-0.00156	-0.02337	0.00531		30.9208	-5.46463e-06	-0.08453	-0.04219	-0.02761	-0.04418	-0.04963		27.085	-6.05703e-05	0.16411	0.17569	0.17989	0.10209	0.15544
61.4975	-1.31022e-05	-0.02535	0.00942	0.04958	0.04103	0.01867		62.3305	-8.72186e-05	0.1075	0.03785	-0.06564	-0.07494	0.00119		31.5392	9.46521e-05	-0.18247	-0.02477	0.07956	-0.00376	-0.03286		27.6267	-6.27902e-05	0.17256	0.21818	0.18276	0.12524	0.17469
62.7033	1.9077e-05	-0.03516	-0.00254	0.03801	0.04828	0.01214		63.5527	-5.25285e-07	0.11549	0.0234	-0.07627	-0.04901	0.0034		32.1577	3.85259e-05	-0.18108	0.0464	0.08635	0.0044	-0.01098		28.1684	7.14744e-07	0.19842	0.23838	0.16863	0.11345	0.17972
63.9092	7.16371e-06	-0.05271	-0.01698	0.09775	0.09189	0.02999		64.7748	-0.000729168	0.07686	-0.00189	-0.0478	0.00412	0.00782		32.7761	4.31034e-05	-0.09536	0.00873	-0.02298	0.0255	-0.02102		28.7101	1.69612e-06	0.17926	0.22876	0.15278	0.13273	0.17338
65.115	0.000389188	-0.04163	0.01572	0.09648	0.07852	0.03727		65.997	0.00277	0.0611	0.00364	-0.03304	-0.01939	0.00308		33.3945	5.66671e-05	-0.08137	0.07092	-0.02296	-0.064	-0.02435		29.2518	2.41099e-06	0.13536	0.18062	0.15666	0.08535	0.1395
66.3208	0.000426435	-0.07822	-0.01068	0.10175	0.05333	0.01655		67.2192	-0.000846501	0.09773	0.00502	-0.04817	0.0166	0.0178		34.0129	4.76867e-06	-0.07901	0.0915	-0.02574	0.00406	-0.0023		29.7935	3.56676e-05	0.14732	0.19895	0.14461	0.07957	0.14261
67.5267	0.000636112	-0.08201	0.01306	0.14365	0.08608	0.0402		68.4413	0.000190065	0.10717	0.01635	-0.02352	0.00153	0.02538		34.6313	-8.64206e-05	-0.06694	0.10952	-0.01939	0.02905	0.01306		30.3352	2.68048e-08	0.17268	0.20928	0.12305	0.07666	0.14542
68.7325	0.000603914	-0.04053	0.0479	0.09872	0.08007	0.04654		69.6635	0.000455063	0.09994	-0.0079	-0.03392	0.02429	0.0206		35.2497	5.21355e-05	-0.06379	0.12883	0.02993	0.06242	0.03935		30.8769	-3.09656e-05	0.20314	0.23885	0.14309	0.11871	0.17595
69.9383	0.000244498	0.12394	0.14352	0.02284	0.09381	0.09603		70.8857	-0.00028337	0.11728	0.02121	-0.06082	-0.00317	0.01862		35.8682	6.42245e-06	-0.04026	0.09662	0.11289	0.12051	0.07244		31.4186	4.17469e-06	0.21575	0.22424	0.18262	0.12824	0.18771
71.1442	-0.000367859	0.36331	0.44701	0.35691	0.35214	0.37984		72.1078	-8.01806e-05	0.07083	0.03364	-0.01194	-0.00131	0.02281		36.4866	-9.19103e-05	-0.02739	0.09687	0.11134	0.10353	0.07109		31.9603	-6.69386e-05	0.18565	0.19284	0.21002	0.14875	0.18431
72.35	-0.000445651	0.5489	0.55423	0.52067	0.46875	0.52314		73.33	-8.01806e-05	0.0669	0.04943	-0.01081	-0.01379	0.02293		37.105	-3.76208e-05	-0.00749	0.1125	0.09085	0.042	0.05947		32.502	-6.41767e-05	0.14399	0.20591	0.22531	0.17953	0.18869
73.5558	0.000145225	0.55619	0.50363	0.57376	0.55043	0.546		74.5522	-8.01806e-05	0.06736	0.05557	-0.00676	-0.0089	0.02682		37.7234	-4.31907e-05	0.04243	0.16244	0.13465	0.04804	0.09689		33.0437	-3.20617e-05	0.16654	0.21075	0.23917	0.20568	0.20554
74.7617	0.000347628	0.55921	0.50333	0.57474	0.56073	0.5495		75.7743	-8.01806e-05	0.10529	0.04943	-0.00997	-0.00579	0.03474		38.3418	1.10988e-05	0.02969	0.16517	0.12582	0.05155	0.09306		33.5854	1.71619e-06	0.17092	0.21392	0.23343	0.1878	0.20152
75.9675	0.000176717	0.54526	0.50943	0.60259	0.53915	0.54911		76.9965	-8.01806e-05	0.08333	0.04858	-0.0131	-0.01291	0.02648		38.9603	5.0538e-05	0.04594	0.19377	0.13429	0.09387	0.11697		34.1271	2.41099e-06	0.1967	0.20535	0.22299	0.18589	0.20273
77.1733	0.000516328	0.57852	0.506	0.54256	0.56301	0.54752		78.2187	-8.01806e-05	0.05715	0.04707	-0.00119	-0.00538	0.02441		39.5787	-4.10918e-05	0.04038	0.22163	0.12912	0.09483	0.12149		34.6688	3.33946e-05	0.1794	0.20132	0.2401	0.14298	0.19095
78.3792	-0.000187765	0.58391	0.47423	0.54445	0.59912	0.55043		79.4408	-8.01806e-05	0.05386	0.04986	0.000104043	-0.00932	0.02363		40.1971	-4.59152e-05	0.03037	0.18227	0.11866	0.07516	0.10162		35.2105	7.04466e-05	0.15446	0.18798	0.22862	0.1301	0.17529
79.585	0.000997477	0.5853	0.45517	0.5036	0.61426	0.53958		80.663	-8.01806e-05	0.05028	0.0469	-0.00242	0.00245	0.0243		40.8155	5.79918e-06	0.00351	0.18068	0.06121	0.01806	0.06586		35.7522	3.27745e-05	0.15804	0.20557	0.22407	0.13343	0.18028
80.7908	0.000856433	0.58593	0.45432	0.50942	0.58507	0.53368		81.8852	-8.01806e-05	0.0503	0.04871	-0.00145	-0.01408	0.02087		41.4339	-8.91455e-05	0.03746	0.13379	0.0812	0.05578	0.07706		36.2939	3.69057e-05	0.13801	0.17985	0.21799	0.11707	0.16323
81.9967	0.000434393	0.61079	0.44039	0.47693	0.61613	0.53606		83.1073	-8.01806e-05	0.04896	0.05452	0.00393	-0.01026	0.02429		42.0523	9.26571e-05	0.00321	0.14668	0.05256	0.0413	0.06093		36.8356	3.12598e-06	0.11318	0.13489	0.18055	0.15632	0.14623
83.2025	8.98958e-05	0.61468	0.51312	0.47906	0.53822	0.53627		84.3295	-8.01806e-05	0.03938	0.03931	0.0134	0.00891	0.02525		42.6707	-4.85193e-05	-0.01956	0.12274	0.05615	0.04036	0.04992		37.3773	-2.92543e-07	0.09357	0.13748	0.18348	0.14412	0.13966
84.4083	-0.000407133	0.76135	0.45454	0.34379	0.59995	0.53991		85.5517	-8.01806e-05	0.04413	0.04541	0.01219	0.00337	0.02628		43.2892	1.34786e-05	0.01599	0.15749	0.06583	0.08165	0.08024		37.919	3.5362e-05	0.08722	0.13719	0.19119	0.17101	0.14665
85.6142	-5.87668e-05	0.62807	0.53202	0.43709	0.52932	0.53162		86.7738	-8.01806e-05	0.04384	0.03915	0.01112	0.0087	0.0257		43.9076	1.1259e-05	-0.01768	0.20214	0.04663	0.04965	0.07019		38.4607	6.84794e-05	0.1083	0.12529	0.16517	0.1447	0.13586
86.82	-0.000240755	0.63465	0.53793	0.44252	0.52386	0.53474		87.996	-8.01806e-05	0.04848	0.03979	0.02435	0.01669	0.03233		44.526	5.24885e-05	-0.02938	0.1507	0.01014	0.09948	0.05773		39.0024	1.6823e-06	0.12259	0.10212	0.1437	0.15675	0.13129
88.0258	-0.000191688	0.58874	0.51708	0.48902	0.55099	0.53646		89.2182	-8.01806e-05	0.03733	0.0504	0.02765	0.00149	0.02922		45.1444	8.06851e-06	-0.02736	0.17325	0.03996	0.0252	0.05276		39.5441	-2.1135e-06	0.13745	0.13311	0.18306	0.17068	0.15607
89.2317	-0.000103817	0.58855	0.49026	0.48401	0.55958	0.5306		90.4403	-8.01806e-05	0.05015	0.05519	0.00983	0.00988	0.03126		45.7628	4.85344e-05	-0.00578	0.15987	0.03337	0.01734	0.0512		40.0858	6.86042e-05	0.47951	0.34334	0.39865	0.41037	0.40796
90.4375	0.000553838	0.59297	0.54024	0.52643	0.51982	0.54487		91.6625	-8.01806e-05	0.04875	0.05554	0.00191	0.01666	0.03072		46.3813	-4.275e-05	-0.00187	0.16871	0.04873	0.01802	0.0584		40.6275	6.55493e-05	0.6748	0.57851	0.72859	0.62419	0.65152
91.6433	-1.68865e-05	0.6057	0.52547	0.48742	0.55868	0.54431		92.8847	-8.01806e-05	0.0459	0.06131	0.000792819	0.01009	0.02952		46.9997	6.29017e-06	0.00566	0.09859	0.04213	0.1036	0.06249		41.1692	1.69612e-06	0.67589	0.62893	0.77879	0.68251	0.69153
92.8492	-0.000129973	0.59781	0.50418	0.47758	0.53842	0.5295		94.1068	-8.01806e-05	0.04482	0.05859	0.01403	0.000482281	0.02948		47.6181	6.0097e-06	0.06089	0.15809	0.04414	0.08874	0.08796		41.7109	3.63624e-05	0.64568	0.61813	0.76431	0.66424	0.67309
94.055	-0.000225897	0.60132	0.53892	0.48193	0.51754	0.53493		95.329	-8.01806e-05	0.05097	0.06362	0.02191	-0.00339	0.03328		48.2365	3.20463e-07	0.06875	0.14717	0.07147	0.09251	0.09498		42.2526	-3.25419e-05	0.64336	0.59823	0.77133	0.6617	0.66865
95.2608	0.000331604	0.60428	0.50185	0.48057	0.55161	0.53458		96.5512	-8.01806e-05	0.0603	0.06121	0.00715	-0.002	0.03166		48.8549	4.07136e-06	0.01828	0.18862	0.10806	0.02717	0.08553		42.7943	-2.98694e-05	0.63834	0.60633	0.74967	0.65483	0.66229
96.4667	0.000140639	0.5882	0.50765	0.49569	0.54622	0.53444		97.7733	-8.01806e-05	0.04113	0.07211	0.00769	-0.00503	0.02897		49.4733	5.32504e-05	0.05294	0.20672	0.1337	0.04638	0.10993		43.336	-3.01504e-05	0.65465	0.6032	0.7361	0.63742	0.65784
97.6725	0.000198661	0.60492	0.52703	0.49724	0.54031	0.54238		98.9955	-8.01806e-05	0.03538	0.06665	0.00665	-0.00451	0.02604		50.0917	2.24403e-06	0.09459	0.17726	0.13055	0.1196	0.1305		43.8777	-6.65133e-05	0.6564	0.59155	0.73476	0.63317	0.65397
98.8783	5.54943e-05	0.62115	0.55764	0.475	0.48349	0.53432		100.218	-8.01806e-05	0.03508	0.06709	0.00917	-0.00241	0.02723		50.7102	4.93169e-06	0.0699	0.14233	0.13287	0.13384	0.11974		44.4194	2.12453e-06	0.6476	0.58419	0.71666	0.63951	0.64699
100.084	-7.16713e-05	0.59837	0.56228	0.47846	0.5134	0.53813		101.44	-8.01806e-05	0.03768	0.07657	0.0087	-0.00645	0.02912		51.3286	-4.55029e-05	0.05794	0.15262	0.11376	0.1113	0.10891		44.9611	-6.58425e-05	0.65424	0.56071	0.71796	0.63524	0.64204
101.29	-2.77164e-05	0.59074	0.52217	0.53667	0.55134	0.55023		102.662	-8.01806e-05	0.03836	0.07888	0.02998	-0.00897	0.03456		51.947	8.53411e-06	0.01953	0.06573	0.09308	0.20397	0.09558		45.5028	-3.28945e-05	0.67427	0.55653	0.71145	0.63409	0.64408
102.496	-0.000222648	0.64441	0.55735	0.43525	0.50438	0.53535		103.884	-8.01806e-05	0.01433	-6.19318	-0.00725	0.00964	-1.54412		52.5654	1.98968e-06	0.01699	0.14434	0.11374	0.1446	0.10492		46.0445	6.83335e-05	0.68832	0.51942	0.70818	0.64332	0.63981
103.702	-0.000175512	0.71129	0.55473	0.47964	0.56517	0.57771		105.106	-8.01806e-05	0.32725	0.01888	-0.1708	0.09349	0.0672		53.1838	-9.7279e-05	0.02892	0.17937	0.11021	0.09428	0.1032		46.5862	7.27453e-05	0.6906	0.56009	0.70827	0.651	0.65249
104.907	2.3539e-05	0.62441	0.54721	0.47263	0.55944	0.55092		106.329	-8.01806e-05	0.30347	-0.05709	-0.20997	0.13878	0.0438		53.8023	-4.00653e-05	0.02338	0.17925	0.10637	0.05333	0.09058		47.1279	7.04466e-05	0.70225	0.55832	0.67923	0.63269	0.64312
106.113	-9.16689e-05	0.5814	0.52439	0.48452	0.54465	0.53374		107.551	-8.01806e-05	0.29713	-0.06261	-0.19578	0.11641	0.03879		54.4207	9.7811e-05	0.00482	0.21565	0.10959	0.00274	0.0832		47.6696	2.41099e-06	0.70454	0.52971	0.68689	0.62558	0.63668
107.319	2.93195e-06	0.52778	0.50674	0.46562	0.53355	0.50842		108.773	-8.01806e-05	0.29023	-0.05617	-0.21744	0.071	0.02191		55.0391	8.48676e-07	0.02588	0.18627	0.11812	-0.000302807	0.08249		48.2113	-3.01504e-05	0.7263	0.52422	0.75003	0.63769	0.65956
108.525	-3.86905e-05	0.56106	0.504	0.46169	0.5518	0.51964		109.995	-8.01806e-05	0.29035	-0.07489	-0.21232	0.08621	0.02234		55.6575	-9.36884e-05	0.01746	0.20042	0.1675	-0.01437	0.09276		48.753	-3.15604e-05	0.73635	0.53775	0.75073	0.63063	0.66387
109.731	-5.66565e-05	0.60046	0.51612	0.50023	0.56454	0.54534		111.217	-8.01806e-05	0.29986	-0.07404	-0.21976	0.04463	0.01267		56.2759	-4.83992e-05	-0.02082	0.18313	0.12957	-0.03316	0.06468		49.2947	-3.08655e-05	0.74476	0.56177	0.7369	0.61012	0.66339
110.937	-0.000117229	0.56778	0.53018	0.49956	0.57304	0.54264		112.439	-8.01806e-05	0.29842	-0.08255	-0.22614	0.0163	0.00151		56.8943	-9.71989e-05	0.01002	0.14192	0.14798	0.08963	0.09739		49.8364	-3.15805e-05	0.74891	0.56311	0.73761	0.63049	0.67003
112.142	-0.000167681	0.56656	0.53979	0.51721	0.56477	0.54709		113.662	-8.01806e-05	0.29667	-0.06205	-0.21546	0.00855	0.00693		57.5127	-4.81948e-05	0.03352	0.13316	0.15643	0.15279	0.11898		50.3781	3.83254e-05	0.74251	0.56001	0.73291	0.64238	0.66945
113.348	-0.000331333	0.57792	0.54808	0.52785	0.55563	0.55237		114.884	-8.01806e-05	0.27487	-0.07295	-0.18695	0.02173	0.00917		58.1312	1.63674e-06	0.03412	0.13494	0.14966	0.12812	0.11171		50.9198	2.12453e-06	0.75291	0.55082	0.74815	0.65711	0.67725
114.554	0.00034755	0.58136	0.48032	0.52428	0.61538	0.55034		116.106	-8.01806e-05	0.28888	-0.07858	-0.19485	0.03365	0.01227		58.7496	5.27834e-05	0.03885	0.10491	0.14136	0.12389	0.10225		51.4615	6.75064e-05	0.74536	0.5642	0.76526	0.66203	0.68421
115.76	0.000238948	0.5805	0.54593	0.56181	0.54426	0.55812		117.328	-8.01806e-05	0.28024	-0.08646	-0.1868	0.05895	0.01648		59.368	5.28331e-05	-0.01612	0.11958	0.15566	0.10181	0.09023		52.0032	0.000103565	0.73946	0.61667	0.75955	0.68282	0.69963
116.966	0.000222086	0.58627	0.48833	0.55563	0.5943	0.55613		118.55	-8.01806e-05	0.30286	-0.07623	-0.20126	0.0739	0.02482		59.9864	-4.77732e-05	-0.02592	0.08204	0.13063	0.0986	0.07134		52.5449	3.76506e-05	0.73745	0.62485	0.76866	0.65575	0.69668
118.172	-9.59228e-05	0.60201	0.47736	0.55383	0.60843	0.56041		119.772	-8.01806e-05	0.30864	-0.07197	-0.18284	0.09215	0.0365		60.6048	-5.10031e-05	0.05052	0.07097	0.1086	0.11334	0.08586		53.0866	3.29639e-05	0.70806	0.61072	0.7768	0.653	0.68715
119.377	6.04371e-06	0.59719	0.4793	0.54359	0.61672	0.5592		120.995	-8.01806e-05	0.30798	-0.07605	-0.18635	0.11591	0.04037		61.2233	1.87364e-06	0.04633	0.07066	0.13152	0.15036	0.09972		53.6283	3.1059e-06	0.68642	0.61399	0.7665	0.6549	0.68045
120.583	0.000635962	0.5797	0.51687	0.57911	0.57701	0.56317		122.217	-8.01806e-05	0.27705	-0.08046	-0.19985	0.12433	0.03027		61.8417	-4.54556e-05	0.01457	0.07155	0.15254	0.12832	0.09175		54.17	3.77925e-05	0.68529	0.62156	0.77205	0.65858	0.68437
121.789	0.000309192	0.55723	0.51732	0.588	0.5646	0.55679		123.439	-8.01806e-05	0.31682	-0.07982	-0.21811	0.13295	0.03796		62.4601	-9.12693e-05	0.06178	0.08765	0.16647	0.12801	0.11098		54.7117	2.5463e-05	0.7052	0.61296	0.78301	0.66149	0.69067
122.995	0.000177271	0.57977	0.5034	0.60023	0.60194	0.57133		124.661	-8.01806e-05	0.29768	-0.08095	-0.20466	0.1428	0.03872		63.0785	0.000192277	0.41264	0.40813	0.52962	0.34047	0.42271		55.2534	3.12598e-06	0.7171	0.62538	0.78953	0.66323	0.69881
124.201	0.00047196	0.56887	0.52073	0.60214	0.60761	0.57484		125.883	-8.01806e-05	0.30038	-0.08581	-0.21158	0.15204	0.03876		63.6969	0.000141813	0.36577	0.44851	0.44268	0.40695	0.41598		55.7951	2.41099e-06	0.73214	0.62403	0.78872	0.67155	0.70411
125.407	5.17025e-05	0.58361	0.55425	0.59269	0.58774	0.57957		127.105	-8.01806e-05	0.29021	-0.09103	-0.22716	0.15088	0.03072		64.3153	5.6446e-06	0.44404	0.49246	0.54821	0.3723	0.46425		56.3368	-3.08455e-05	0.70909	0.62251	0.79973	0.66508	0.6991
126.612	0.000124166	0.58543	0.54536	0.59128	0.59618	0.57956		128.327	-8.01806e-05	0.28885	-0.09095	-0.23862	0.15554	0.02871		64.9338	0.000104257	0.45224	0.49014	0.51021	0.40718	0.46494		56.8785	-3.04166e-05	0.70456	0.65437	0.80053	0.66119	0.70516
127.818	0.000331923	0.57957	0.56222	0.60334	0.58334	0.58212		129.55	-8.01806e-05	0.28871	-0.088	-0.25905	0.15564	0.02433		65.5522	8.80036e-05	0.46852	0.51242	0.53707	0.36568	0.47092		57.4202	3.59543e-05	0.69945	0.64605	0.79892	0.66379	0.70205
129.024	0.000310707	0.57915	0.47503	0.59133	0.67904	0.58114		130.772	-8.01806e-05	0.29914	-0.09836	-0.29261	0.16569	0.01847		66.1706	0.000199298	0.46984	0.49351	0.53542	0.39753	0.47408		57.9619	3.83454e-05	0.70997	0.64648	0.78612	0.67425	0.7042
130.23	-3.70924e-06	0.57798	0.48543	0.59276	0.68261	0.58469		131.994	-8.01806e-05	0.26845	-0.10083	-0.25705	0.15712	0.01692		66.789	0.000373578	0.46884	0.51751	0.5378	0.38925	0.47835		58.5036	-3.39514e-05	0.7017	0.65297	0.78863	0.67313	0.70411
131.436	0.000238013	0.57455	0.48469	0.59179	0.66605	0.57927		133.216	-8.01806e-05	0.28157	-0.09841	-0.2636	0.1589	0.01961		67.4074	-4.82389e-05	0.47095	0.5362	0.53954	0.4007	0.48685		59.0453	-2.98426e-05	0.70342	0.66169	0.79567	0.65756	0.70459
132.642	1.0151e-05	0.53376	0.50249	0.54885	0.64794	0.55826		134.438	-8.01806e-05	0.26768	-0.10495	-0.24759	0.15985	0.01875		68.0258	-4.33358e-05	0.46369	0.52632	0.54773	0.38428	0.4805		59.587	3.80789e-05	0.72409	0.65985	0.82082	0.66882	0.71839
133.847	0.000269036	0.56466	0.53027	0.56837	0.61571	0.56975		135.661	-8.01806e-05	0.26761	-0.10967	-0.24443	0.16106	0.01864		68.6442	-1.76273e-06	0.45983	0.53052	0.53553	0.37236	0.47456		60.1287	3.70974e-05	0.71819	0.66828	0.82484	0.6757	0.72175
135.053	8.25199e-06	0.58129	0.54205	0.56222	0.61105	0.57415		136.883	-8.01806e-05	0.27597	-0.11014	-0.31068	0.16212	0.00432		69.2627	-0.000193877	0.46152	0.54302	0.53709	0.39249	0.48353		60.6704	-3.15604e-05	0.72208	0.67074	0.81424	0.67909	0.72154
136.259	-0.000450533	0.56367	0.58378	0.58741	0.57179	0.57666		138.105	-8.01806e-05	0.27779	-0.11273	-0.32791	0.17532	0.00312		69.8811	0.000313634	0.45822	0.53228	0.54701	0.40418	0.48542		61.2121	-2.98639e-05	0.7169	0.65315	0.80894	0.69632	0.71883
137.465	-0.000688957	0.58271	0.56934	0.57974	0.56759	0.57484		139.327	-8.01806e-05	0.27373	-0.08919	-0.38303	0.17743	-0.00526		70.4995	0.000125508	0.46213	0.54642	0.55655	0.40359	0.49217		61.7538	-2.76229e-05	0.72369	0.66394	0.81609	0.69628	0.725
138.671	-0.000702142	0.56709	0.58654	0.59865	0.56665	0.57973		140.549	-8.01806e-05	0.27892	-0.09441	-0.31522	0.18442	0.01343		71.1179	-0.000336764	0.47953	0.54549	0.54714	0.42411	0.49907		62.2955	7.20503e-05	0.70603	0.66195	0.81902	0.71795	0.72624
								141.771	-8.01806e-05	0.28454	-0.1043	-0.28459	0.19066	0.02158		71.7363	-4.10615e-05	0.48718	0.53953	0.55101	0.41588	0.4984
								142.994	-8.01806e-05	0.26319	-0.10053	-0.21968	0.19894	0.03548		72.3547	5.5608e-05	0.49457	0.52975	0.54829	0.44103	0.50341
								144.216	-8.01806e-05	0.26408	-0.10352	-0.22412	0.19299	0.03236		72.9732	-4.49537e-05	0.49478	0.52463	0.5464	0.4256	0.49785
								145.438	-8.01806e-05	0.28837	-0.1038	-0.256	0.1919	0.03012		73.5916	-0.000154933	0.48649	0.52613	0.55349	0.43675	0.50072
								146.66	-8.01806e-05	0.26179	-0.12076	-0.22226	0.21339	0.03304		74.21	0.000281874	0.49289	0.52409	0.54919	0.45176	0.50448
								147.882	-8.01806e-05	0.30056	-0.09359	-0.259	0.19174	0.03493		74.8284	0.000143775	0.49124	0.54177	0.54227	0.42956	0.50121
								149.104	-8.01806e-05	0.27262	-0.10382	-0.21627	0.1992	0.03793		75.4468	-0.000145986	0.49462	0.56131	0.54542	0.44384	0.5113
								150.327	-8.01806e-05	0.26024	-0.09967	-0.21298	0.20258	0.03754		76.0653	-0.000219934	0.49479	0.52802	0.53742	0.44878	0.50225
								151.549	-8.01806e-05	0.26081	-0.09848	-0.21104	0.20244	0.03843		76.6837	-0.000131948	0.50286	0.53776	0.52984	0.47895	0.51235
								152.771	-8.01806e-05	0.26603	-0.10086	-0.21916	0.2037	0.03743		77.3021	5.08006e-05	0.49399	0.58095	0.54168	0.45076	0.51684
								153.993	-8.01806e-05	0.26661	-0.11354	-0.22288	0.20473	0.03373		77.9205	5.60693e-05	0.49658	0.55569	0.53697	0.45574	0.51124
																78.5389	9.03492e-06	0.49718	0.56483	0.53634	0.4513	0.51241
																79.1573	-8.85937e-05	0.49246	0.61598	0.53976	0.43487	0.52077
																79.7758	0.000354153	0.50482	0.5951	0.54539	0.42656	0.51797
																80.3942	0.000187377	0.48441	0.61067	0.5489	0.43436	0.51959
																81.0126	4.94529e-05	0.4842	0.57978	0.54541	0.44106	0.51261
																81.631	0.000301551	0.49157	0.58273	0.52225	0.4205	0.50426
																82.2494	0.0002037	0.49397	0.54663	0.53111	0.421	0.49818
																82.8678	0.000152893	0.47593	0.55458	0.54898	0.41063	0.49753
																83.4862	-3.76438e-05	0.47768	0.56568	0.54688	0.41879	0.50226
																84.1047	0.000255303	0.47903	0.60787	0.54661	0.42288	0.5141
																84.7231	0.000257757	0.48632	0.62148	0.53861	0.41997	0.51659
																85.3415	0.000311333	0.48798	0.60017	0.53251	0.43177	0.51311
																85.9599	0.000216092	0.48298	0.58346	0.54212	0.43227	0.51021
																86.5783	0.000309228	0.48516	0.60104	0.53741	0.40466	0.50707
																87.1967	0.000406234	0.47386	0.60925	0.53737	0.39967	0.50504
																87.8152	0.00021073	0.48131	0.58031	0.54126	0.41271	0.5039
																88.4336	0.000112412	0.48095	0.55693	0.52954	0.40201	0.49236
																89.052	0.000108519	0.47801	0.5743	0.53187	0.39609	0.49507
																89.6704	1.67069e-05	0.39868	0.5433	0.44672	0.39685	0.44639
																90.2888	6.45809e-05	0.44937	0.56308	0.51964	0.39245	0.48113
																90.9073	6.29722e-05	0.46958	0.54601	0.53826	0.41016	0.491
																91.5257	0.000210857	0.47035	0.56877	0.51771	0.40021	0.48926
																92.1441	0.000496167	0.44771	0.56126	0.53244	0.39785	0.48482
																92.7625	0.000258857	0.44274	0.5725	0.52982	0.40262	0.48692
																93.3809	0.000263754	0.47945	0.56247	0.53525	0.40023	0.49435
																93.9993	0.000302976	0.49065	0.58077	0.53164	0.3866	0.49742
																94.6178	0.000357047	0.48998	0.55943	0.52289	0.39538	0.49192
																95.2362	0.000162166	0.49445	0.57399	0.53478	0.39264	0.49897
																95.8546	0.000111934	0.49862	0.57409	0.5345	0.39787	0.50127
																96.473	0.000307537	0.50179	0.56748	0.53653	0.3964	0.50055
																97.0914	0.000205875	0.49235	0.55198	0.52996	0.39766	0.49299
																97.7098	5.56208e-05	0.48692	0.55883	0.52105	0.39292	0.48993
																98.3282	0.000160329	0.49281	0.56293	0.53018	0.39703	0.49574
																98.9467	0.00011254	0.49282	0.55391	0.5366	0.3927	0.49401
																99.5651	0.00030707	0.48562	0.56852	0.53335	0.38935	0.49421
																100.183	0.000162094	0.4814	0.57396	0.52179	0.39776	0.49373
																100.802	0.00030944	0.47838	0.56069	0.53924	0.39152	0.49246
																101.42	-3.84054e-05	0.46313	0.56255	0.55679	0.3934	0.49397
																102.039	0.000116789	0.41579	0.56498	0.6251	0.39685	0.50068
																102.657	0.000307705	0.47068	0.56712	0.55546	0.40209	0.49884
																103.276	0.000207216	0.49158	0.58921	0.52708	0.38968	0.49939
																103.894	0.000160613	0.48801	0.59264	0.54488	0.38955	0.50377
																104.512	0.00016551	0.48529	0.57774	0.54348	0.40826	0.50369
																105.131	0.000310104	0.49285	0.58477	0.54154	0.40443	0.5059
																105.749	0.000104902	0.48935	0.5717	0.53438	0.4087	0.50103
																106.368	0.000204984	0.4904	0.57525	0.54354	0.41281	0.5055
																106.986	0.000406965	0.48791	0.58185	0.55	0.41396	0.50843
																107.605	0.000303027	0.48637	0.58003	0.55271	0.4207	0.50995
																108.223	0.000167965	0.49069	0.57724	0.55567	0.42196	0.51139
																108.841	0.000114106	0.48658	0.57314	0.5576	0.4296	0.51173
																109.46	0.000146342	0.49157	0.5698	0.55186	0.43539	0.51215
																110.078	0.000105972	0.50134	0.58615	0.54421	0.42746	0.51479
																110.697	6.48642e-05	0.49971	0.59029	0.54628	0.43123	0.51688
																111.315	0.000108519	0.49064	0.59303	0.55212	0.42389	0.51492
																111.933	0.00015892	0.48782	0.58782	0.55174	0.41643	0.51095
																112.552	0.000163055	0.4936	0.59383	0.55048	0.42277	0.51517
