# Supplementary material for: Distinct roles of nonmuscle myosin II isoforms for establishing tension and elasticity during cell morphodynamics
Source: eLife journal article supplement (doi:10.7554/elife.71888), 2021-08-10
Supplement: data1 [file Figure 5B_source data.xlsx]

## Sheet: Initial forces
WT	NM llA-KO	NM llB-KO	NM llC-KO
Force [nN]	Force [nN]	Force [nN]	Force [nN]
92.5639	29.4408	-0.5377	109.86
49.241	2.47899	87.1433	50.3354
131.406	5.82297	72.5323	82.456
169.683	-0.69888	107.091	98.6924
196.882	26.2143	54.1805	139.801
159.948	12.2649	97.8673	97.5744
73.3143	9.76711	56.1713	91.5411
139.218	40.6292	64.7163	33.989
95.6001	2.29095	197.985	114.748
72.8392	16.839	149.543	16.0488
120.486	3.13087	133.585	89.0796
79.0009	4.55527	45.7572	83.3515
30.2989	0.88536	138.175	159.116
41.9987	5.30743	14.3585	53.7224
29.5386		40.1579	124.452
65.489		234.015	73.7101
11.3503		79.5739	123.357
70.8966		126.694	111.406
118.625		146.414	217.419
77.6626		167.78	117.01
71.688		175.008	123.208
19.0207		182.128	169.1
42.8305		67.1493	95.322
153.003		108.91	152.169
132.933		66.7652	2.78391
68.8627		86.4392	79.1953
124.408		129.891	74.843
36.229		103.702	167.001
72.0007		179.718	65.843
111.428		162.087	143.196
65.6185		160.788	131.433
115.136		200.832	191.812
52.2897		60.2008	211.79
46.2289		40.299	82.2747
206.082		205.638	106.719
79.1243			60.0235
79.086			130.251
232.762			103.557
120.365			171.156
56.5671			43.5093
63.3856			88.3069
124.688			127.464
130.669			204.209
90.3166			132.234
			66.59
			69.9155
