# Supplementary material for: Distinct roles of nonmuscle myosin II isoforms for establishing tension and elasticity during cell morphodynamics
Source: eLife journal article supplement (doi:10.7554/elife.71888), 2021-08-10
Supplement: data1 [file Figure 5D-G and Figure 5_figure supplement 2_source data.xlsx]

## Sheet: Tabelle1
WT								NM IIA-KO								NM IIB-KO								NM IIC-KO
Time	Reference	Top	Right	Bottom	Left	Average		Time	Reference	Top	Right	Bottom	Left	Average		Time	Reference	Top	Right	Bottom	Left	Average		Time	Reference	Top	Right	Bottom	Left	Average
1.1837	0	0	0	0	0	0		0.5895	0	0	0	0	0	0		1.70812	0	0	0	0	0	0		0.66753	0	0	0	0	0	0
2.3674	-0.00202	-0.01914	-0.14282	0.08465	0.16189	0.02115		1.179	0.0002282	0.00033171	0.00416	0.00374	0.00178	0.0025		3.41623	-0.000391417	0.03492	0.08425	0.000546721	0.00789	0.0319		1.33507	0.00115	0.03351	0.01856	-0.02629	-0.01709	0.00217
3.5511	-0.000792238	-0.05976	-0.05069	0.16627	0.15056	0.05159		1.7685	0.00044184	-0.0289	-0.00207	0.00412	0.02319	-0.000914164		5.12435	-0.00117	0.10154	0.03818	0.05622	0.0581	0.06351		2.0026	0.00911	0.01671	0.02498	-0.01936	-0.03538	-0.00327
4.7348	-0.00794	0.04845	0.09154	0.05909	0.02013	0.0548		2.358	-0.000265049	-0.01774	-0.00261	-0.04487	0.000450902	-0.01619		6.83247	-0.00148	0.15491	-0.00796	0.15169	0.12055	0.1048		2.67013	0.0113	-0.01727	0.0187	-0.00758	0.04846	0.01058
5.9185	-0.00159	-0.25524	-0.09636	0.32708	0.17454	0.0375		2.9475	-0.00106	-0.03354	-0.00771	0.01362	0.01677	-0.00271		8.54058	-0.00112	0.26434	0.07329	0.27667	0.19641	0.20268		3.33767	0.01267	0.02581	0.10236	-0.05047	0.00252	0.02005
7.1022	0.00416	-0.02186	0.3067	0.1176	-0.1981	0.05109		3.537	-0.000283471	-0.02235	-0.0044	-0.03881	0.0162	-0.01234		10.2487	-0.00281	0.21137	0.06807	0.33983	0.13122	0.18762		4.0052	0.0079	0.02484	0.07382	-0.0305	0.02231	0.02262
8.2859	-0.00247	-0.09786	0.29121	0.19574	-0.22462	0.04112		4.1265	-0.00257	-0.03963	0.0257	0.01024	-0.02456	-0.00706		11.9568	-0.00314	2.85575	2.45464	3.00918	2.2398	2.63984		4.67273	-0.00154	8.53751e-05	0.08322	-0.0013	-0.00252	0.01987
9.4696	-0.00534	0.03381	0.23078	0.25574	-0.10828	0.10301		4.716	-0.0025	-0.04688	0.04025	0.02976	-0.01253	0.00265		13.6649	-0.000997886	2.93717	2.10356	2.77242	2.90853	2.68042		5.34027	0.0031	0.02093	0.05348	0.02872	-0.03016	0.01824
10.6533	0.00124	0.045	0.31664	0.23149	-0.09104	0.12552		5.3055	-0.00173	-0.04944	0.0497	0.01596	-0.02906	-0.00321		15.373	0.00225	2.74324	1.89256	2.63062	2.68329	2.48743		6.0078	0.00977	0.09168	0.06153	-0.03474	-0.0334	0.02127
11.837	0.00265	0.04716	0.32545	0.1366	-0.11001	0.0998		5.895	-0.000116894	-0.03535	0.04561	0.00797	-0.04583	-0.0069		17.0812	-0.00153	2.52876	1.71703	2.57533	2.53853	2.33991		6.67533	0.01069	0.17919	0.05698	-0.0206	-0.00925	0.05158
13.0207	-0.00492	0.15145	0.36317	0.21793	-0.07144	0.16528		6.4845	0.000633299	-0.02095	0.04029	0.00541	-0.05153	-0.0067		18.7893	-0.00257	2.42204	1.64356	2.4095	2.41521	2.22258		7.34287	0.000734515	0.14425	0.01101	-0.04391	0.04253	0.03847
14.2044	-0.009	3.22157	2.85855	3.39089	2.9197	3.09768		7.074	0.000291848	-0.0482	0.06602	0.01389	-0.06526	-0.00839		20.4974	-0.00141	2.35627	1.56515	2.29308	2.33919	2.13842		8.0104	0.00545	0.1267	0.00929	-0.08856	0.04837	0.02395
15.3881	0.00386	2.20414	2.1438	2.85859	2.49324	2.42495		7.6635	-0.00133	-0.05676	0.05234	0.02882	-0.06622	-0.01046		22.2055	0.00061764	2.30643	1.51785	2.22917	2.27265	2.08152		8.67793	0.01956	0.045	-0.00958	-0.07098	-0.00994	-0.01138
16.5718	0.00651	1.99411	2.07647	2.77169	2.4937	2.33399		8.253	0.0024	-0.11403	0.07228	0.10406	-0.08291	-0.00515		23.9136	0.000582139	2.28536	1.54206	2.15491	2.21685	2.04979		9.34547	0.01418	0.03706	0.01606	-0.09619	-0.06402	-0.02677
17.7555	0.009	1.99802	2.07365	2.61671	2.36034	2.26218		8.8425	0.000269848	-0.0218	0.08077	0.00232	-0.06083	0.000116127		25.6217	-0.00143	2.23204	1.49244	2.12115	2.24457	2.02255		10.013	0.00109	0.1129	0.06595	-0.03566	-0.05113	0.02302
18.9392	0.00441	2.03121	2.07869	2.66673	2.30602	2.27066		9.432	0.000235317	-0.00189	0.08463	-0.00772	-0.07772	-0.00067358		27.3299	-0.000798678	2.14869	1.49927	2.19925	2.26725	2.02862		10.6805	0.0064	0.11579	0.08686	0.05781	-0.09485	0.0414
20.1229	0.01859	2.02994	2.08432	2.63029	2.30139	2.26148		10.0215	-0.00173	0.00597	0.09294	-0.0053	-0.07099	0.00566		29.038	0.000378655	2.12196	1.51436	2.20634	2.25269	2.02384		11.3481	0.00727	0.09195	0.05056	0.05905	-0.05039	0.03779
21.3066	0.002	2.01961	2.04004	2.35408	2.30641	2.18004		10.611	0.000952563	0.00174	0.08358	-0.02347	-0.06043	0.00035512		30.7461	0.000676322	2.13372	1.5154	2.11345	2.24953	2.00303		12.0156	0.00451	0.06438	0.08737	0.03231	-0.14724	0.0092
22.4903	0.01164	1.84694	2.09296	2.46358	2.15703	2.14013		11.2005	0.00435	-0.00784	0.06912	-0.00834	-0.03697	0.00399		32.4542	0.000991332	2.15297	1.48142	2.08573	2.29203	2.00304		12.6831	0.00149	0.1407	0.13138	0.0108	-0.1396	0.03582
23.674	0.0135	1.71618	2.04134	2.41968	2.17579	2.08825		11.79	0.00328	-0.01925	0.07293	0.02368	-0.05379	0.00589		34.1623	0.000335114	2.1227	1.43545	2.14418	2.34075	2.01077		13.3507	0.00945	0.09106	0.13334	0.00661	-0.06035	0.04267
24.8577	0.01972	1.74722	1.98272	2.43682	2.18256	2.08733		12.3795	0.0048	-0.04214	0.06181	0.02456	-0.03733	0.00173		35.8704	-0.00415	2.11583	1.32392	2.11709	2.34926	1.97653		14.0182	0.00839	0.07145	0.11321	0.01803	0.01829	0.05524
26.0414	0.01107	1.57569	2.02304	2.41618	2.12892	2.03596		12.969	0.00297	-0.05907	0.04726	0.03114	-0.02754	-0.00205		37.5786	7.23843e-05	2.13019	1.28517	2.0915	2.33638	1.96081		14.6857	0.00664	0.04117	0.1266	0.06703	0.05184	0.07166
27.2251	0.01682	1.53024	2.03443	2.44252	2.06923	2.0191		13.5585	-0.00074148	-0.07493	0.03471	0.03791	-0.02708	-0.00735		39.2867	-0.0037	2.1218	1.26738	2.05352	2.34896	1.94791		15.3533	-0.00192	0.0663	0.08746	0.0634	0.06777	0.07123
28.4088	0.00676	1.59452	1.94642	2.31134	2.05546	1.97693		14.148	0.000458007	-0.07431	0.03858	0.04637	-0.03496	-0.00608		40.9948	-0.00199	2.08959	1.27084	2.03451	2.35633	1.93782		16.0208	-0.00154	0.13933	0.06415	0.01262	0.05554	0.06791
29.5925	0.000925022	1.66906	1.98681	2.2729	2.00627	1.98376		14.7375	-0.00241	-0.09253	0.06718	0.0573	-0.06052	-0.00715		42.7029	-0.00367	2.08248	1.26247	2.00757	2.34695	1.92487		16.6883	0.000920082	0.09828	0.04345	-0.00413	-0.02394	0.02842
30.7762	0.00824	1.5391	1.93861	2.09703	1.97621	1.88774		15.327	-0.000868597	-0.06598	0.04425	0.07414	-0.01614	0.00907		44.411	-0.00337	2.05002	1.24054	1.99023	2.29376	1.89364		17.3559	-0.000456662	0.14735	0.07813	-0.00884	-0.04848	0.04204
31.9599	0.00855	1.53798	1.85413	2.14682	1.99835	1.88432		15.9165	-0.000730327	-0.04602	0.07409	0.05041	-0.03332	0.01129		46.1191	-0.00020211	0.08091	-0.44207	-0.10046	0.11062	-0.08775		18.0234	-0.00265	0.13509	0.07521	-0.0227	-0.03147	0.03903
33.1436	0.00782	1.57015	1.8914	2.17349	1.95191	1.89674		16.506	-0.000268445	2.18952	2.03561	2.34607	2.363	2.23355		47.8273	-0.00391	-0.54667	-1.01219	-0.67712	-0.36701	-0.65075		18.6909	-0.000815924	0.09383	0.12901	-0.10243	-0.11165	0.00219
34.3273	0.01278	1.50046	1.77456	2.1274	2.0168	1.85481		17.0955	-0.00244	2.03401	1.9387	2.24677	2.20039	2.10497		49.5354	0.000251902	-0.56813	-1.04059	-0.82985	-0.42284	-0.71535		19.3585	0.000365055	0.07449	0.10787	-0.12568	-0.12206	-0.01635
35.511	0.01012	1.52317	1.81258	2.10749	1.96637	1.8524		17.685	0.000509883	1.59999	1.62056	1.82911	1.81706	1.71668		51.2435	-0.00101	-0.53598	-1.01613	-0.81869	-0.40976	-0.69514		20.026	0.00195	0.05668	0.10688	-0.06845	-0.08756	0.00189
36.6947	0.00842	1.50086	1.7956	2.11696	1.94251	1.83898		18.2745	0.000909588	1.91369	1.84105	2.10389	2.09139	1.98751		52.9516	-0.00252	-0.39768	-0.82731	-0.64161	-0.33634	-0.55073		20.6935	0.00133	0.09653	0.06237	-0.03596	-0.00689	0.02901
37.8784	0.00345	1.56209	1.84293	2.10251	1.84691	1.83861		18.864	0.000748546	1.98945	1.95398	2.33691	2.20388	2.12106		54.6597	-0.0009103	-0.26849	-0.72235	-0.52351	-0.21373	-0.43202		21.3611	0.00109	1.51514	1.33306	1.41449	1.49856	1.44031
39.0621	-0.00111	1.64214	1.75444	2.18977	1.89176	1.86952		19.4535	0.000478477	2.00826	1.99022	2.36222	2.24255	2.15081		56.3678	0.000943078	-0.26028	-0.67876	-0.47585	-0.12771	-0.38565		22.0286	0.00129	2.03669	3.03339	2.36248	2.86073	2.57332
40.2458	0.00518	1.58135	1.72608	2.16631	1.88609	1.83996		20.043	0.000921516	2.05423	2.02027	2.32049	2.26876	2.16594		58.076	0.000867812	-0.37482	-0.61194	-0.38756	-0.23321	-0.40188		22.6961	0.00224	1.92741	2.82463	2.21598	2.7597	2.43193
41.4295	0.0097	1.59143	1.77217	2.20051	1.85003	1.85354		20.6325	-0.000361905	2.08016	2.05434	2.29123	2.26567	2.17285		59.7841	0.000696373	-0.27016	-0.55336	-0.26987	-0.18932	-0.32068		23.3637	-0.00354	1.92736	2.80076	2.09722	2.67397	2.37483
42.6132	0.00319	0.36867	0.67893	0.76697	0.45922	0.56845		21.222	-0.000853801	2.0857	2.07712	2.31513	2.23703	2.17874		61.4922	-0.0036	-0.17888	-0.57301	-0.2283	-0.17554	-0.28893		24.0312	0.000711368	1.84128	2.74439	2.09059	2.58185	2.31453
43.7969	0.01089	-0.68469	-0.31565	-0.37909	-0.58994	-0.49234		21.8115	0.00319	2.1131	2.07038	2.31452	2.25527	2.18832		63.2003	-0.00326	-0.15331	-0.62656	-0.17627	-0.12121	-0.26934		24.6987	-0.00353	1.7998	2.62051	2.00746	2.47336	2.22528
44.9806	0.00708	-0.71362	-0.46505	-0.42209	-0.59752	-0.54957		22.401	0.0018	2.08828	2.04301	2.31729	2.25545	2.17601		64.9084	-0.00302	-0.01831	-0.64029	-0.19001	-0.14703	-0.24891		25.3663	-0.0023	1.72955	2.56196	1.9611	2.40522	2.16446
46.1643	0.00197	-0.71561	-0.44699	-0.38649	-0.56745	-0.52914		22.9905	-0.002	2.09799	2.03064	2.33956	2.29032	2.18963		66.6166	-0.000470075	0.16623	-0.50442	-0.12241	-0.04252	-0.12578		26.0338	0.000404948	1.71445	2.53778	1.9358	2.3636	2.13791
47.348	0.00478	-0.704	-0.42312	-0.36268	-0.5549	-0.51117		23.58	-0.0021	2.09777	2.00395	2.34252	2.29896	2.1858		68.3247	-0.00313	0.21784	-0.5508	-0.08864	-0.0851	-0.12667		26.7013	0.00109	1.68314	2.09856	1.88204	2.32677	1.99763
48.5317	0.00691	-0.68763	-0.37065	-0.36142	-0.5321	-0.48795		24.1695	0.000584881	2.08652	1.98531	2.3397	2.27967	2.1728		70.0328	-0.000100372	0.20471	-0.55867	-0.08296	-0.07735	-0.12857		27.3689	-0.00124	1.61614	2.49207	1.87501	2.30628	2.07238
49.7154	0.00349	-0.66395	-0.32246	-0.33517	-0.49799	-0.45489		24.759	-0.00139	2.12641	2.00239	2.37165	2.25841	2.18971		71.7409	0.000854324	0.25647	-0.63019	-0.11886	0.0014	-0.1228		28.0364	0.00267	1.65171	2.081	1.82687	2.30385	1.96586
50.8991	0.000172962	-0.43534	-0.25738	-0.31997	-0.51809	-0.3827		25.3485	0.000811743	2.07835	1.95385	2.34663	2.27108	2.16248		73.449	-0.00142	0.28248	-0.74232	-0.05836	0.11669	-0.10038		28.7039	-0.000119599	1.64778	2.43879	1.78685	2.26264	2.03401
52.0828	0.00357	-0.41372	-0.13134	-0.13747	-0.45932	-0.28546		25.938	0.00198	2.125	1.96531	2.41456	2.29601	2.20022		75.1571	-0.00299	0.3306	-0.5939	-0.04388	0.13925	-0.04198		29.3715	-0.000735933	1.60445	1.66587	1.74611	2.2284	1.81121
53.2665	0.00236	-0.41688	-0.05996	-0.19695	-0.43348	-0.27682		26.5275	0.00114	2.07199	1.9724	2.42253	2.28889	2.18895		76.8653	-0.000545985	0.25943	-0.30834	0.03584	0.19672	0.04591		30.039	-0.00274	1.60567	2.0788	1.71675	2.16401	1.89131
54.4502	-0.00272	-0.34688	0.06018	-0.24544	-0.46564	-0.24945		27.117	-0.00058051	2.08336	1.97459	2.34085	2.25285	2.16291		78.5734	-0.000743418	0.31038	-0.17729	0.14511	0.16727	0.11137		30.7065	0.00364	1.60206	1.6789	1.69037	2.11186	1.7708
55.6339	0.00388	-0.13339	0.07971	-0.20759	-0.46883	-0.18252		27.7065	-2.29488e-05	2.09686	1.99232	2.40892	2.23749	2.1839		80.2815	0.00225	0.29043	-0.11175	0.18678	0.18798	0.13836		31.3741	0.00259	1.58331	1.6504	1.68029	2.01051	1.73113
56.8176	0.00208	-0.2091	0.10645	-0.09902	-0.4176	-0.15482		28.296	-0.00137	2.03492	1.97792	2.30613	2.23831	2.13932		81.9896	-0.00056659	0.2304	-0.18202	0.23931	0.29074	0.14461		32.0416	-0.00385	1.5605	1.6099	1.65682	2.02659	1.71345
58.0013	-0.00033432	-0.25299	0.25378	0.02251	-0.40004	-0.09419		28.8855	-0.00325	2.04633	1.98495	2.41574	2.22803	2.16876		83.6977	0.00253	0.1893	-0.17272	0.29933	0.31097	0.15672		32.7091	-0.00306	1.53127	1.59876	1.67287	1.95044	1.68834
59.185	-0.00203	-0.09911	0.36013	0.11329	-0.34285	0.00786		29.475	-0.00281	2.05014	1.97504	2.31713	2.2422	2.14613		85.4058	0.00218	0.09621	-0.29068	0.33942	0.21129	0.08906		33.3767	-0.00576	1.4461	1.55753	1.66225	1.99378	1.66491
60.3687	0.00164	-0.16682	0.33884	0.19523	-0.32215	0.01127		30.0645	-0.00372	2.02685	1.9892	2.33712	2.2195	2.14317		87.114	0.00368	0.05194	-0.44572	0.44074	0.25164	0.07465		34.0442	-0.00537	1.43911	1.5664	1.62679	1.95207	1.64609
61.5524	0.00147	-0.30693	0.28723	0.14829	-0.28117	-0.03814		30.654	-0.000230316	2.03319	1.96135	2.3398	2.2702	2.15114		88.8221	-0.00181	0.10905	-0.52483	0.43662	0.28666	0.07688		34.7117	-0.00677	1.43763	1.55433	1.5948	1.9496	1.63409
62.7361	-0.000415986	-0.07806	0.39809	0.10291	-0.41001	0.00323		31.2435	0.00342	2.04105	2.00339	2.31485	2.22	2.14482		90.5302	-0.00369	0.04458	-0.55555	0.39112	0.25604	0.03405		35.3793	-0.00576	1.41799	1.53098	1.56321	1.91935	1.60788
63.9198	0.00358	-0.31614	0.43202	0.24062	-0.39892	-0.0106		31.833	0.00232	2.04138	1.95784	2.34567	2.25374	2.14966		92.2383	-0.0041	0.05848	-0.23565	0.36543	0.29404	0.12057		36.0468	-0.00349	1.40572	1.51882	1.5763	1.87846	1.59483
65.1035	0.02375	-0.06448	0.44385	0.09226	-0.39768	0.01849		32.4225	-0.00178	2.10024	2.01567	2.43082	2.16974	2.17912		93.9464	-0.000677078	0.07496	-0.20156	0.37987	0.24357	0.12421		36.7143	0.000428919	1.38998	1.53491	1.5407	1.80326	1.56721
66.2872	0.02757	-0.05488	0.40131	0.09975	-0.37036	0.01896		33.012	-0.00391	2.04774	1.98167	2.35365	2.18933	2.1431		95.6545	-0.00357	0.02134	-0.21574	0.37477	0.31918	0.12489		37.3819	-0.00257	1.38001	1.54097	1.47918	1.75688	1.53926
67.4709	-0.00874	-0.11068	0.5801	0.20185	-0.39024	0.07026		33.6015	-0.00161	2.02669	1.97969	2.32375	2.17707	2.1268		97.3627	-0.00225	0.0723	-0.26055	0.37493	0.33996	0.13166		38.0494	-0.00317	1.36918	1.51882	1.44804	1.73357	1.5174
68.6546	-0.000423726	-0.21124	0.6398	0.34197	-0.39429	0.09406		34.191	-0.0007202	2.04289	1.95161	2.38076	2.19223	2.14187		99.0708	-0.0014	0.1109	-0.31509	0.38172	0.35816	0.13392		38.7169	-0.00372	1.34504	1.49939	1.4502	1.66362	1.48956
69.8383	-0.00403	-0.20384	0.69155	0.44027	-0.38291	0.13626		34.7805	-0.00133	2.11235	1.93924	2.19779	2.21223	2.1154										39.3845	-0.00547	1.31967	1.50552	1.4488	1.64115	1.47878
71.022	-0.00597	-0.1688	0.71202	0.47139	-0.28824	0.18159		35.37	0.000965849	2.0445	1.93685	2.29237	2.20838	2.12053										40.052	0.00528	1.27794	1.44555	1.46042	1.64299	1.45673
72.2057	-0.00704	-0.21215	0.73328	0.39268	-0.32529	0.14713		35.9595	0.000191125	2.08315	1.92903	2.2772	2.20135	2.12268										40.7195	0.00050928	1.2916	1.4239	1.43777	1.5953	1.43714
73.3894	-0.01433	-0.19804	0.73528	0.43697	-0.32836	0.16146		36.549	-0.00402	2.10629	1.92367	2.18524	2.21955	2.10869										41.3871	0.00152	1.30027	1.40236	1.39406	1.5907	1.42185
74.5731	-0.033	-0.16244	0.73099	0.57964	-0.31809	0.20753		37.1385	-0.00213	2.13891	1.91516	2.18153	2.22012	2.11393										42.0546	0.00494	1.27885	1.35769	1.38998	1.59438	1.40523
75.7568	-0.0117	-0.19569	0.66613	0.54978	-0.25152	0.19217		37.728	-0.00152	2.06581	1.94702	2.28193	2.20118	2.12398										42.7221	0.00411	1.25729	1.3473	1.37507	1.6109	1.39764
								38.3175	0.000580602	2.07041	1.94216	2.35269	2.20712	2.1431										43.3897	0.00915	1.20867	1.33174	1.3734	1.59436	1.37704
								38.907	-6.51259e-05	2.10651	1.96702	2.19798	2.20337	2.11872										44.0572	0.00993	1.21435	1.30456	1.371	1.60914	1.37476
								39.4965	0.000451248	2.05841	1.94751	2.20633	2.1907	2.10074										44.7247	0.00506	1.23373	1.26501	1.34446	1.5968	1.36
								40.086	-0.000208359	2.0512	1.96954	2.20265	2.18582	2.1023										45.3923	0.008	1.17366	1.30562	1.36381	1.57164	1.35368
								40.6755	0.00179	2.0734	1.99267	2.34539	2.17415	2.1464										46.0598	0.00632	1.16413	1.3323	1.3617	1.5414	1.34988
								41.265	-0.00194	2.09979	1.96233	2.38524	2.20359	2.16274										46.7273	0.0078	1.19045	1.34689	1.31446	1.51692	1.34218
								41.8545	-0.00229	2.02768	1.93354	2.30695	2.22994	2.12453										47.3949	0.00102	1.19737	1.3393	1.2847	1.47562	1.32425
								42.444	-0.00332	2.00712	1.92927	2.33177	2.21275	2.12023										48.0624	-7.40737e-05	1.12612	1.29072	1.25515	1.48163	1.2884
								43.0335	-0.00673	1.99682	1.92908	2.33958	2.22624	2.12293										48.7299	-0.00332	1.12341	1.27455	1.2573	1.50504	1.29008
								43.623	-0.00327	1.98757	1.9396	2.34107	2.21973	2.12199										49.3975	0.00361	1.1441	1.22054	1.23087	1.54115	1.28416
								44.2125	-0.00622	1.98044	1.94905	2.35986	2.23595	2.13132										50.065	0.00486	1.17047	1.212	1.19564	1.51865	1.27419
								44.802	-0.00569	1.97924	1.96811	2.35764	2.21934	2.13108										50.7325	0.00385	1.19238	1.18695	1.25885	1.5461	1.29607
								45.3915	-0.00611	1.99166	1.92397	2.43445	2.23387	2.14599										51.4001	0.000507366	1.25823	1.18127	1.25046	1.52558	1.30389
								45.981	-0.00625	1.9608	1.94357	2.42416	2.22226	2.1377										52.0676	0.000140125	1.23037	1.16008	1.25171	1.48103	1.2808
								46.5705	-0.00568	2.00316	1.93532	2.31588	2.22179	2.11904										52.7351	-0.0028	1.24839	1.17722	1.19443	1.42697	1.26175
								47.16	-0.00277	2.00562	1.93238	2.30496	2.21315	2.11403										53.4027	-0.00466	1.26828	1.18504	1.16435	1.48293	1.27515
								47.7495	-0.00128	1.99973	1.93499	2.30271	2.22035	2.11444										54.0702	-0.00255	1.32663	1.21284	1.14709	1.5175	1.30102
								48.339	-0.000484687	2.0122	1.94114	2.30027	2.23237	2.12149										54.7377	-0.00221	1.34834	1.19795	1.15647	1.54484	1.3119
								48.9285	-0.00347	1.97618	1.93596	2.35549	2.22119	2.12221										55.4053	-0.00176	1.29415	1.18869	1.16147	1.51601	1.29008
								49.518	-0.01044	2.01014	1.95407	2.29565	2.21433	2.11855										56.0728	-0.00121	1.27308	1.19863	1.17476	1.47588	1.28059
								50.1075	-0.00939	1.94914	1.94704	2.37154	2.22409	2.12295										56.7403	-0.00385	1.27428	1.18966	1.14018	1.47377	1.26947
								50.697	-0.00861	2.00286	1.93896	2.28297	2.22449	2.11232										57.4079	-0.00514	1.25598	1.21729	1.15787	1.4617	1.27321
								51.2865	-0.00461	1.98846	1.95294	2.28302	2.21803	2.11061										58.0754	-0.00525	1.25555	1.24857	1.14405	1.43603	1.27105
								51.876	-0.00822	1.98603	1.95505	2.25227	2.19477	2.09703										58.7429	-0.00973	1.23998	1.21582	1.147	1.47187	1.26867
								52.4655	-0.01055	1.98497	1.9246	2.28921	2.2279	2.10667										59.4105	0.00521	1.25102	1.18564	1.12617	1.41917	1.2455
								53.055	-0.00515	1.99089	1.92696	2.28315	2.24177	2.11069										60.078	0.00275	1.29863	1.19235	1.09941	1.44068	1.25777
								53.6445	-0.00517	1.97454	1.9402	2.30292	2.23022	2.11197										60.7455	-0.00232	1.29635	1.15994	1.10707	1.50336	1.26668
								54.234	-0.00791	1.93726	2.01421	2.28688	2.16732	2.10142										61.4131	0.000727484	1.30018	1.16607	1.11916	1.49003	1.26886
								54.8235	-0.00684	1.88209	2.02075	2.27681	2.17503	2.08867										62.0806	-0.00166	1.32337	1.16622	1.13504	1.46865	1.27332
								55.413	-0.00522	1.96512	2.0347	2.3106	2.13888	2.11232										62.7481	0.00228	1.33826	1.1321	1.2215	1.48398	1.29396
								56.0025	-0.00388	1.88318	2.04906	2.3316	2.12944	2.09832										63.4157	0.00138	-0.36121	-0.49913	-0.95366	-0.58245	-0.59911
								56.592	-0.00365	1.94459	2.02127	2.31305	2.13163	2.10263										64.0832	-0.00559	-0.50443	-0.56621	-0.40761	-0.62178	-0.52501
								57.1815	-0.00642	1.86576	2.01686	2.3344	2.12916	2.08655										64.7507	0.000161621	-0.50138	-0.59611	-0.88388	-0.56704	-0.6371
								57.771	-0.00395	1.85702	2.0394	2.43162	2.11398	2.1105										65.4183	0.000403475	-0.48954	-0.64168	-0.90262	-0.52093	-0.63869
								58.3605	-0.00521	1.88376	1.9884	2.35492	2.16025	2.09683										66.0858	-0.000411795	-0.49913	-0.66169	-0.92556	-0.49514	-0.64538
								58.95	-0.00168	1.83806	2.00126	2.43869	2.15426	2.10807										66.7533	0.00642	-0.4925	-0.57747	-0.90119	-0.55377	-0.63123
								59.5395	-0.00798	1.87528	1.9873	2.36073	2.15538	2.09467										67.4209	0.00124	-0.35981	-0.49339	-0.8827	-0.51929	-0.5638
								60.129	0.00186	1.83955	2.01672	2.3606	2.1039	2.08019										68.0884	-0.00163	-0.255	-0.49896	-0.79278	-0.45768	-0.5011
								60.7185	-0.00707	1.88419	2.00172	2.34811	2.13224	2.09157										68.7559	-0.00382	-0.31245	-0.46962	-0.78011	-0.48684	-0.51226
								61.308	-0.00535	1.85821	2.02545	2.32518	2.11935	2.08205										69.4235	-0.00884	-0.36213	-0.46079	-0.76106	-0.49843	-0.5206
								61.8975	-0.00808	1.8548	2.02975	2.35854	2.13755	2.09516										70.091	-0.00321	-0.32069	-0.4641	-0.3251	-0.47043	-0.39508
								62.487	-0.01043	1.82096	2.02515	2.45633	2.17202	2.11861										70.7585	-0.000813873	-0.30882	-0.4632	-0.36742	-0.51593	-0.41384
								63.0765	-0.00265	1.89256	2.04125	2.36902	2.17674	2.11989										71.4261	-0.0065	-0.29582	-0.43769	-0.82849	-0.51938	-0.52035
								63.666	0.000710785	1.89665	2.04187	2.36946	2.1647	2.11817										72.0936	0.0014	-0.35464	-0.52019	-0.80471	-0.47111	-0.53766
								64.2555	0.000760153	1.84678	2.06748	2.36768	2.12819	2.10254										72.7611	-0.00399	-0.23038	-0.55019	-0.35468	-0.40953	-0.38619
								64.845	-0.00248	1.87912	2.07105	2.35458	2.13171	2.10911										73.4287	0.00879	-0.19822	-0.53267	-0.31925	-0.38737	-0.35938
								65.4345	0.00222	1.8682	2.04852	2.37328	2.15976	2.11244										74.0962	0.01554	-0.2221	-0.47657	-0.81907	-0.43826	-0.489
								66.024	-0.000285469	1.85822	2.04736	2.35777	2.17954	2.11072										74.7637	0.01693	-0.24918	-0.47627	-0.82934	-0.48636	-0.51029
								66.6135	-0.000529121	1.80554	2.05925	2.37837	2.17764	2.1052										75.4313	0.01135	-0.24963	-0.46949	-0.8435	-0.509	-0.5179
								67.203	-0.00252	1.81175	2.06936	2.38989	2.13454	2.10138										76.0988	0.01534	-0.22092	-0.49594	-0.33658	-0.46462	-0.37951
								67.7925	-0.0047	1.82266	2.08135	2.38288	2.12841	2.10382										76.7663	0.01295	-0.29446	-0.51361	-0.7669	-0.51541	-0.5226
								68.382	-0.00095331	1.81981	2.07946	2.38178	2.13364	2.10367										77.4339	0.01279	-0.32107	-0.52551	-0.73141	-0.46362	-0.5104
								68.9715	-0.00209	1.78375	2.11362	2.3933	2.10724	2.09948										78.1014	0.01514	-0.2952	-0.49492	-0.77645	-0.47368	-0.51006
								69.561	0.000974579	1.82612	2.0949	2.39864	2.10946	2.10728										78.7689	0.0125	-0.28158	-0.52899	-0.79522	-0.45684	-0.51566
								70.1505	-0.00236	1.76283	2.11237	2.33752	2.07759	2.07258										79.4365	0.01407	-0.25459	-0.5142	-0.76777	-0.45343	-0.4975
								70.74	0.00257	1.81171	2.10003	2.40624	2.08716	2.10129										80.104	0.000409352	-0.27084	-0.57713	-0.7426	-0.35611	-0.48667
								71.3295	0.00111	1.77992	2.08962	2.31929	2.08227	2.06777										80.7715	0.01722	-0.24512	-0.56511	-0.75521	-0.44241	-0.50196
								71.919	-0.00161	1.80071	2.11531	2.40831	2.06495	2.09732										81.4391	0.00528	-0.20579	-0.54988	-0.80048	-0.51595	-0.51802
								72.5085	-0.00279	1.82466	2.11028	2.38131	2.04103	2.08932										82.1066	-0.000174365	-0.1931	-0.60362	-0.80974	-0.44199	-0.51211
								73.098	-0.00125	1.75993	2.09711	2.30161	2.04207	2.05018										82.7741	0.01315	-0.23364	-0.59728	-0.73135	-0.43323	-0.49888
								73.6875	-0.00223	1.74789	2.09518	2.35856	2.05333	2.06374										83.4417	0.00805	-0.27006	-0.58293	-0.77913	-0.57667	-0.5522
								74.277	-0.00212	1.74828	2.08447	2.3635	2.07928	2.06888										84.1092	0.00886	-0.26089	-0.62605	-0.77412	-0.4953	-0.53909
								74.8665	0.00155	1.76866	2.05965	2.40937	2.07571	2.07835										84.7767	-0.00955	-0.21063	-0.54937	-0.78427	-0.58329	-0.53189
								75.456	-0.0026	1.71949	2.08136	2.32042	2.06202	2.04582										85.4443	-0.00708	-0.21314	-0.51656	-0.72369	-0.52151	-0.49372
								76.0455	-0.00713	1.78626	2.06021	2.39745	2.11013	2.08851										86.1118	-0.00762	-0.26528	-0.44548	-0.70711	-0.55673	-0.49365
								76.635	-0.00603	1.80606	2.0527	2.38996	2.13497	2.09592										86.7793	0.00529	-0.2429	-0.36112	-0.78336	-0.68779	-0.51879
								77.2245	-0.00375	1.81087	2.02956	2.38566	2.16478	2.09772										87.4469	0.00352	-0.22198	-0.43273	-0.75969	-0.59749	-0.50297
								77.814	0.00168	1.76378	2.08948	2.38847	2.08763	2.08234										88.1144	0.01148	-0.24827	-0.42769	-0.69338	-0.53288	-0.47555
								78.4035	0.001	1.74977	2.08746	2.31905	2.07758	2.05847										88.7819	-0.000492141	-0.27462	-0.40331	-0.66992	-0.61168	-0.48988
								78.993	-0.00128	1.81282	2.08447	2.35929	2.07295	2.08238										89.4495	-0.00043907	-0.35022	-0.44211	-0.63778	-0.70842	-0.53463
								79.5825	-0.000424823	1.74767	2.0969	2.31537	2.04856	2.05212										90.117	0.000510899	-0.27427	-0.46826	-0.72191	-0.79428	-0.56468
								80.172	-0.000843721	1.8136	2.10253	2.29008	2.04475	2.06274										90.7845	0.01497	-0.24187	-0.44957	-0.77698	-0.80666	-0.56877
								80.7615	-0.0015	1.7638	2.11606	2.28679	2.0174	2.04601										91.4521	0.00549	-0.26179	-0.45208	-0.76246	-0.79892	-0.56881
								81.351	-0.00207	1.801	2.10483	2.30613	2.02699	2.05974										92.1196	-0.00503	-0.31083	-0.44372	-0.74367	-0.7352	-0.55836
								81.9405	-0.00223	1.81497	2.12148	2.28829	2.02337	2.06203										92.7871	-0.000611914	-0.31805	-0.41164	-0.73108	-0.76315	-0.55598
								82.53	-0.00113	1.81353	2.10223	2.30318	2.03364	2.06315										93.4547	0.00486	-0.21179	-0.37624	-0.76113	-0.815	-0.54104
								83.1195	0.00045497	1.77526	2.1001	2.29074	2.01883	2.04623										94.1222	0.00858	-0.26292	-0.46366	-0.78472	-0.83277	-0.58602
								83.709	0.00372	1.77029	2.10302	2.28396	2.017	2.04357										94.7897	0.00191	-0.25392	-0.44494	-0.7491	-0.80187	-0.56246
								84.2985	0.00293	1.8064	2.12832	2.278	2.00338	2.05402										95.4573	0.00373	-0.33093	-0.39196	-0.7998	-0.8695	-0.59805
								84.888	0.00116	1.82276	2.12253	2.25501	1.98977	2.04752										96.1248	0.00826	-0.34921	-0.40133	-0.81841	-0.82981	-0.59969
								85.4775	0.00209	1.83438	2.1016	2.27875	2.01611	2.05771
								86.067	0.00196	1.82238	2.08877	2.27397	2.02698	2.05303
								86.6565	0.00163	1.78511	2.07853	2.26972	2.01763	2.03775
								87.246	0.00589	1.85841	2.06881	2.15789	2.05633	2.03536
								87.8355	-0.000847935	1.85345	2.07964	2.1618	2.04252	2.03435
								88.425	0.01583	1.89084	2.29687	2.20151	1.91275	2.07549
								89.0145	-0.000280306	-0.17649	0.40561	0.31069	-0.03989	0.12498
								89.604	0.00149	-0.39271	0.16705	0.14949	-0.35659	-0.10819
								90.1935	0.000995492	-0.45335	0.11399	0.15868	-0.28115	-0.11546
								90.783	-0.000239185	-0.40257	0.12944	0.17148	-0.24701	-0.08717
								91.3725	-0.00135	-0.41067	0.1568	0.13367	-0.26718	-0.09684
								91.962	0.00226	-0.40047	0.17919	0.13127	-0.2739	-0.09098
								92.5515	0.00337	-0.40397	0.18032	0.12669	-0.27965	-0.09415
								93.141	0.00272	-0.40256	0.19811	0.1183	-0.27604	-0.09055
								93.7305	0.00204	-0.39159	0.16688	0.08671	-0.25052	-0.09713
								94.32	-0.00194	-0.37038	0.16281	0.09784	-0.24259	-0.08808
								94.9095	3.53836e-05	-0.37446	0.16351	0.11312	-0.23092	-0.08219
								95.499	0.0013	-0.37056	0.13077	0.09757	-0.19544	-0.08441
								96.0885	0.00248	-0.29961	0.1516	0.14319	-0.20526	-0.05252
								96.678	-0.00173	-0.34658	0.13135	0.0709	-0.19853	-0.08571
								97.2675	-0.000400461	-0.31189	0.11838	0.11799	-0.17733	-0.06321
								97.857	-0.00117	-0.2805	0.13955	0.14152	-0.18502	-0.04611
								98.4465	-0.000683387	-0.34192	0.15812	0.12802	-0.1758	-0.05789
								99.036	-0.00043286	-0.30526	0.15555	0.15073	-0.17893	-0.04448
								99.6255	-0.00174	-0.29647	0.14158	0.16462	-0.16981	-0.04002
								100.215	-0.00288	-0.32867	0.14669	0.16359	-0.16938	-0.04694
								100.805	0.000169913	-0.35049	0.16231	0.20528	-0.17093	-0.03846
								101.394	0.00212	-0.37216	0.14114	0.22997	-0.14879	-0.03746
								101.984	-0.000813178	-0.36759	0.16738	0.21271	-0.17352	-0.04026
								102.573	0.000616577	-0.36551	0.11884	0.21132	-0.13122	-0.04164
								103.162	0.00043423	-0.36671	0.18499	0.22278	-0.17339	-0.03308
								103.752	0.00273	-0.3763	0.16063	0.2073	-0.13308	-0.03536
								104.341	0.00186	-0.39498	0.17944	0.19972	-0.16332	-0.04479
								104.931	-0.00155	-0.35613	0.11924	0.16958	-0.11115	-0.04461
								105.52	4.96171e-05	-0.37605	0.10187	0.15522	-0.12054	-0.05988
								106.11	-3.03576e-05	-0.36597	0.13435	0.23387	-0.12154	-0.02982
								106.7	-0.00301	-0.40344	0.13332	0.21279	-0.12017	-0.04437
								107.289	-1.73722e-05	-0.37957	0.13669	0.19952	-0.12602	-0.04234
								107.879	-0.00103	-0.35348	0.13772	0.26138	-0.11356	-0.01698
								108.468	-0.000359215	-0.40508	0.19103	0.19285	-0.1747	-0.04897
								109.058	-0.00137	-0.36242	0.18325	0.19429	-0.18015	-0.04126
								109.647	0.00184	-0.36889	0.16112	0.19281	-0.15665	-0.0429
								110.237	0.00171	-0.38294	0.17177	0.21123	-0.16407	-0.041
								110.826	-0.007	-0.41861	0.18059	0.18379	-0.18381	-0.05951
								111.415	-0.00133	-0.36023	0.20703	0.26292	-0.1898	-0.02002
								112.005	-0.00204	-0.37263	0.20558	0.25867	-0.1805	-0.02222
								112.594	-0.000950973	-0.39041	0.22531	0.25784	-0.19511	-0.02559
								113.184	-0.00117	-0.38861	0.2564	0.27814	-0.21032	-0.0161
								113.773	-0.000444138	-0.38722	0.23056	0.29024	-0.1992	-0.0164
								114.363	-0.000233918	-0.34173	0.20601	0.23811	-0.19278	-0.0226
								114.953	-0.00223	-0.3541	0.21765	0.24931	-0.2123	-0.02486
								115.542	-0.000299177	-0.36549	0.23504	0.25974	-0.21939	-0.02252
								116.132	-0.00722	-0.38536	0.21013	0.27986	-0.18708	-0.02061
								116.721	0.00404	-0.36325	0.20597	0.23848	-0.19097	-0.02744
								117.311	0.00388	-0.3526	0.23083	0.18509	-0.22675	-0.04086
								117.9	0.00115	-0.31589	0.21568	0.21656	-0.20783	-0.02287
								118.49	0.00691	-0.32691	0.18542	0.17972	-0.2156	-0.04434
								119.079	0.02361	-0.29139	0.22727	0.17537	-0.24717	-0.03398
								119.668	0.02164	-0.27094	0.1969	0.16764	-0.22968	-0.03402
								120.258	0.0387	-0.26731	0.16922	0.14743	-0.19774	-0.0371
								120.847	0.03515	-0.28168	0.17606	0.12816	-0.22121	-0.04967
								121.437	-0.0007141	-0.32076	0.13713	0.07912	-0.19327	-0.07445
								122.026	-0.00227	-0.29697	0.14855	0.03689	-0.22056	-0.08302
								122.616	-0.00266	-0.25193	0.12261	0.12045	-0.17454	-0.04585
								123.206	0.000547046	-0.31865	0.12735	0.07574	-0.15821	-0.06844
								123.795	0.000547046	-0.25519	0.11438	0.14258	-0.16001	-0.03956
								124.385	0.000547046	-0.26269	0.12119	0.12082	-0.15925	-0.04498
								124.974	0.00867	-0.23866	0.15581	0.14028	-0.19174	-0.03358
								125.564	-0.004	-0.26056	0.20452	0.10717	-0.25019	-0.04977
								126.153	-0.00212	-0.22251	0.21466	0.117	-0.26947	-0.04008
								126.743	0.00103	-0.25293	0.23007	0.10821	-0.28471	-0.04984
								127.332	0.01514	-0.26329	0.20575	0.11873	-0.25649	-0.04882
								127.921	0.0387	-0.32293	0.17417	0.09174	-0.22886	-0.07147
								128.511	0.0387	-0.31611	0.17193	0.08264	-0.22182	-0.07084
								129.101	0.000286412	-0.30437	0.16826	0.06567	-0.22498	-0.07385
								129.69	0.00058951	-0.2294	0.16862	0.03241	-0.23371	-0.06552
								130.28	0.00302	-0.25293	0.15139	0.07147	-0.22632	-0.0641
								130.869	0.00285	-0.19327	0.10464	0.06798	-0.18887	-0.05238
								131.458	-0.00785	-0.28555	0.06915	0.10254	-0.09977	-0.05341
								132.048	0.00881	0.07309	0.15962	0.12226	-0.06492	0.07251
								132.637	0.0103	0.08056	0.18017	0.13459	-0.11364	0.07042
								133.227	0.00819	0.08225	0.22778	0.16396	-0.1532	0.0802
								133.816	0.00897	0.02941	0.2382	0.07118	-0.18532	0.03837
								134.406	0.00528	0.0576	0.22096	0.20055	-0.15673	0.0806
								134.995	-0.00187	0.04259	0.23607	0.23583	-0.15363	0.09022
								135.585	-0.00464	0.05089	0.22507	0.21799	-0.1459	0.08701
								136.174	-0.00207	0.08083	0.20978	0.1928	-0.1427	0.08518
								136.764	0.000994443	0.11591	0.28442	0.18969	-0.12386	0.11654
								137.353	-0.0027	0.10782	0.29302	0.24127	-0.10558	0.13413
								137.943	-0.00135	0.21407	0.29477	0.15576	-0.09894	0.14141
								138.532	-0.00282	0.16484	0.30256	0.23474	-0.0966	0.15139
								139.122	-0.00318	0.28491	0.33167	0.2456	-0.10682	0.18884
								139.712	-0.00242	0.32595	0.3321	0.22243	-0.06888	0.2029
								140.301	0.000395862	0.39445	0.32483	0.20568	-0.03694	0.222
