# Supplementary material for: Distinct roles of nonmuscle myosin II isoforms for establishing tension and elasticity during cell morphodynamics
Source: eLife journal article supplement (doi:10.7554/elife.71888), 2021-08-10
Supplement: data1 [file Figure 5I_source data.xlsx]

## Sheet: Force increase
WT	NM IIA-KO	NM IIB-KO	NM IIC-KO
Force increase [nN]	Force increase [nN]	Force increase [nN]	Force increase [nN]
87.858	-0.73642	98.9842	13.9448
63.7323	6.26823	-18.2323	39.1224
78.4808	-18.2394	119.776	87.1809
74.2205	5.24989	-29.6895	56.9992
61.9223	11.0655	32.7737	6.10407
28.4275	-7.82524	83.5841	131.764
65.7179	-10.3615	-19.0001	-13.624
125.024	-14.6296	3.4549	55.2698
51.2413	5.98134	67.0796	-17.9303
83.3534	-6.67669	47.3929	48.0407
78.0599	11.2774	59.8711	31.2172
126.994	5.38682	125.642	43.4593
32.7018	9.48901	19.4945	35.641
56.3096	-5.61431	43.3566	27.8224
99.0557	10.6904	93.3953	13.846
29.1096	9.94341	-28.1599	40.5228
69.9693	12.3405	31.371	16.132
53.6914	7.71703	37.6919	-5.49372
73.4547		35.7384	73.6593
57.4871		92.9953	39.1795
40.1975		19.9955	35.9194
59.9669		141.737	-12.7837
54.1758		58.0718	155.263
90.7344		21.2037	-20.2637
24.1295		22.0918	125.124
34.7958		60.141	30.1434
83.3463		27.2668	39.2332
-5.00394		12.4776	-14.82
47.9323		66.4539	97.9893
116.901		85.3338	160.825
63.7748		-13.887	195.429
103.872		56.7564	119.266
54.7536		29.1742	34.8196
61.255		-32.8226	88.0152
81.2781		68.4405	230.658
127.705		75.3276	34.4288
37.2668		5.07827	114.881
58.2805		44.7251	-9.84247
46.6672		43.8461	184.178
37.1204		31.3973	23.781
105.425		68.3033	271.337
162.982		52.2756	15.4435
39.1532		58.5302	90.4642
36.6098		56.0576	-6.5913
140.302		54.805	39.1648
83.1875		2.13498	178.823
60.5508		110.79	218.444
-0.21701		120.251	19.7032
92.4343		39.7368	84.2785
74.4682		54.0543	219.229
69.4153		-56.9648	142.778
154.512		75.5129	148.286
119.826		4.11632	228.141
76.9197		59.1733	264.765
147.935		76.4952	21.7972
38.7902		38.7363
71.2738		48.7291
112.312		18.0945
7.32776		7.85316
103.269		21.9764
109.619		-15.0854
94.23		38.2136
98.223		71.0818
136.449		43.4796
146.243		79.2307
89.8135		26.014
60.9477		62.6731
57.4581		24.8327
37.0526		48.7695
19.7448		20.8065
160.071		84.5639
33.9792		34.8573
21.7292		40.7079
-19.7327		38.0611
117.14		21.4383
85.6269		-1.48382
134.252		-3.04882
		31.9042
		25.5521
		16.2752
		14.8631
		15.3478
